# Supplementary material for: Ezrin Inhibition Overcomes Acquired Resistance to Vemurafenib in BRAFV600E-Mutated Colon Cancer and Melanoma Cells In Vitro
Source: MDPI journal article supplement (doi:10.3390/ijms241612906), 2023-08-17
Supplement: s1 [file s1]

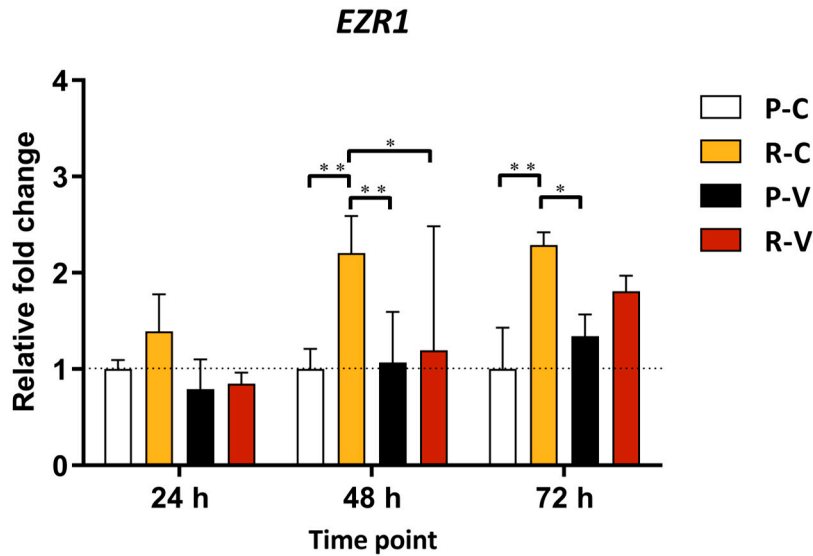

**Figure S1.** Ezrin gene expression analysis by real-time quantitative PCR in vemurafenib-sensitive and resistant RKO cells in the absence and in the presence of vemurafenib (3  $\mu$ M) for indicated time periods. Data represent mean and standard deviations from two independent biological experiments carried out in technical duplicates, where statistical significance is denoted with an asterisk. P (parental RKO cells), R (vemurafenib-resistant RKO cells), C – untreated cells (control), V- treatment with vemurafenib. Statistical significance ( $p < 0.05$ ) is denoted with an asterisk, ( $p < 0.01$ ) is denoted with two asterisks.

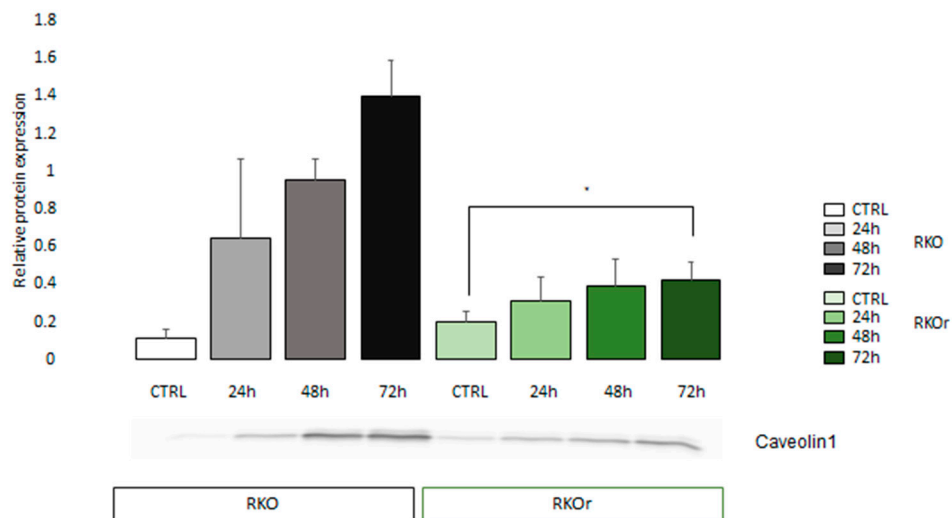

**Figure S2.** Western blot analysis of caveolin-1 expression in vemurafenib-sensitive (parental) and resistant RKO colon cancer cells in the absence and in the presence of vemurafenib (3  $\mu$ M) for indicated time periods. Relative protein expression was measured by densitometry analysis using Quantity One software. Data represent mean and standard deviation obtained from three independent biological experiments. Statistical significance ( $p < 0.05$ ) is denoted with an asterisk. CTRL indicates untreated (control) cells.
