# Supplementary material for: Ezrin Inhibition Overcomes Acquired Resistance to Vemurafenib in BRAFV600E-Mutated Colon Cancer and Melanoma Cells In Vitro
Source: Int J Mol Sci. 2023 Aug 17;24(16):12906. doi: 10.3390/ijms241612906 (PMC10454476; doi:10.3390/ijms241612906)
Supplement: Supplementary file 1 [file ijms-24-12906-s001.zip › Supplementary Table S1.xlsx]

## Sheet: Sheet1
Table S1. List of differentially expressed proteins between vemurafenib-sensitive and vemuraf-enib-resistant RKO colon cancer cells with BRAFV600E mutation identified by 2-DE/MALDI TOF/TOF mass spectrometry analysis. Only proteins with significant changes (p<0.05) in the abundance and peptide matches > 4 were taken into consideration
Expression status (­in resistant cells)	p-value	Fold Change	Uniprot ID	Accession number	Protein name	Gene	MW	pI	MASCOT Score	Peptide Matches	Protein sequence coverage (%)
↑	0.049	3.1	ACTB_HUMAN	P60709	Actin, cytoplasmic 1	ACTB	42052	5.29	102	13	32
↑	0.049	3.1	ACTG_HUMAN	P63261	Actin, cytoplasmic 2	ACTG1	42108	5.31	102	13	32
↑	0.025	1.9	RBM26_HUMAN	Q5T8P6	RNA-binding protein 26	RBM26	113927	9.21	28	4	3
↑	0.007	1.8	D11L8_HUMAN	A8MPP1	Putative ATP-dependent RNA helicase DDX11-like protein 8	DDX11L8	102944	7.28	31	4	6
↑	0.012	1.7	ZN879_HUMAN	B4DU55	Zinc finger protein 879	ZNF879	66132	9.63	25	4	10
↑	0.047	1.6	ACSS3_HUMAN	Q9H6R3	Acyl-CoA synthetase short-chain family member 3, mitochondrial	ACSS3	75358	8.84	30	5	11
↑	0.013	1.6	TIM21_HUMAN	Q9BVV7	Mitochondrial import inner membrane translocase subunit Tim21	TIMM21	28527	9.73	42	4	27
↑	0.037	1.6	EF1A1_HUMAN	P68104	Elongation factor 1-alpha 1	EEF1A1	50451	9.1	45	7	23
↑	0.013	1.6	PDE9A_HUMAN	O76083	High affinity cGMP-specific 3',5'-cyclic phosphodiesterase 9A	PDE9A	69475	5.85	50	8	16
↑	0.009	1.6	PPIE_HUMAN	Q9UNP9	Peptidyl-prolyl cis-trans isomerase E	PPIE	33695	5.41	44	4	16
↑	0.027	1.4	TOM34_HUMAN	Q15785	Mitochondrial import receptor subunit TOM34	TOMM34	34937	9.12	57	5	28
↑	0.036	1.4	CQ100_HUMAN	A8MU93	Uncharacterized protein C17orf100	C17orf100	13050	11.57	53	5	66
↑	0.02	1.4	COF1_HUMAN	P23528	Cofilin-1	CFL1	18719	8.22	60	6	50
↑	0.03	1.4	ALDOA_HUMAN	P04075	Fructose-bisphosphate aldolase A	ALDOA	39851	8.3	135	18	58
↑	0.04	1.3	CBR1_HUMAN	P16152	Carbonyl reductase [NADPH] 1	CBR1	30641	8.55	87	9	39
↑	0.049	1.3	NDKB_HUMAN	P22392	Nucleoside diphosphate kinase B	NME2	17401	8.52	51	6	41
↑	0.003	1.3	AK1A1_HUMAN	P14550	Aldo-keto reductase family 1 member A1	AKR1A1	36892	6.32	80	10	39
↑	0.003	1.3	PDE1A_HUMAN	P54750	Calcium/calmodulin-dependent 3',5'-cyclic nucleotide phosphodiesterase 1A	PDE1A	61441	5.72	60	9	27
↑	0.049	1.3	HPRT_HUMAN	P00492	Hypoxanthine-guanine phosphoribosyltransferase	HPRT1	24792	6.21	77	11	50
↑	0.025	1.3	KCNH5_HUMAN	Q8NCM2	Potassium voltage-gated channel subfamily H member 5	KCNH5	112946	7.51	41	8	15
↑	0.046	1.3	AMPL_HUMAN	P28838	Cytosol aminopeptidase	LAP3	56530	8.03	123	19	39
↑	0.044	1.2	MPP2_HUMAN	Q14168	MAGUK p55 subfamily member 2	MPP2	64882	6.32	47	7	19
↑	0.002	1.2	SIAS_HUMAN	Q9NR45	Sialic acid synthase	NANS	40738	6.29	77	8	33
↑	0.032	1.2	PP1B_HUMAN	P62140	Serine/threonine-protein phosphatase PP1-beta catalytic subunit	PPP1CB	37961	5.84	120	13	40
↑	0.037	1.2	TPIS_HUMAN	P60174	Triosephosphate isomerase	TPI1	31057	5.65	73	8	29
↑	0.034	1.2	ANXA1_HUMAN	P04083	Annexin A1	ANXA1	38918	6.57	122	17	56
↑	0.043	1.2	CH60_HUMAN	P10809	60 kDa heat shock protein, mitochondrial	HSPD1	61187	5.7	176	20	39
↑	0.036	1.1	BIP_HUMAN	P11021	Endoplasmic reticulum chaperone BiP	HSPA5	72402	5.07	264	31	47
↑	0.047	1.6	CNN3_HUMAN	Q15417	Calponin-3	CNN3	36562	5.69	42	5	24
↑	0.043	1.2	CH60_HUMAN	P10809	60 kDa heat shock protein, mitochondrial	HSPD1	61187	5.7	93	14	31
↑	0.043	1.2	FAKD3_HUMAN	Q14CZ7	FAST kinase domain-containing protein 3, mitochondrial	FASTKD3	76895	8.63	60	9	22
↑	0.036	1.1	BIP_HUMAN	P11021	Endoplasmic reticulum chaperone BiP	HSPA5	72402	5.07	247	33	53
↑	0.002	1.7	ARL1_HUMAN	P40616	ADP-ribosylation factor-like protein 1	ARL1	20518	5.63	39	4	40
↑	0.002	1.5	TET5C_HUMAN	Q5VWP2	Terminal nucleotidyltransferase 5C	TENT5C	45486	5.45	42	9	28
↑	0.004	1.4	ANX10_HUMAN	Q9UJ72	Annexin A10	ANXA10	37823	5.13	36	7	22
↑	0.005	1.4	FKB1B_HUMAN	P68106	Peptidyl-prolyl cis-trans isomerase FKBP1B	FKBP1B	11889	8.62	40	6	52
↑	0.007	1.3	HNRH1_HUMAN	P31943	Heterogeneous nuclear ribonucleoprotein H	HNRNPH1	49484	5.89	94	16	59
↑	0.008	1.3	UAP1L_HUMAN	Q3KQV9	UDP-N-acetylhexosamine pyrophosphorylase-like protein 1	UAP1L1	57565	5.94	90	19	39
↑	0.014	1.4	K1C9_HUMAN	P35527	Keratin, type I cytoskeletal 9	KRT9	62255	8.72	81	15	44
↑	0.017	1.5	EZRI_HUMAN	P15311	Ezrin	EZR	69484	5.94	150	34	46
↑	0.018	1.5	DJB11_HUMAN	Q9UBS4	DnaJ homolog subfamily B member 11	DNAJB11	40774	5.81	53	12	32
↑	0.02	1.3	K2C1_HUMAN	P04264	Keratin, type II cytoskeletal 1	KRT1	66170	8.15	43	12	23
↑	0.02	1.6	SUH_HUMAN	Q06330	Recombining binding protein suppressor of hairless	RBPJ	56343	6.8	43	9	24
↑	0.02	1.5	SSAS1_HUMAN	Q7Z2R9	Putative uncharacterized protein SSBP3-AS1	SSBP3-AS1	10988	12.15	48	6	61
↑	0.025	1.7	CC28B_HUMAN	Q9BUN5	Coiled-coil domain-containing protein 28B	CCDC28B	22251	5.23	29	4	24
↑	0.025	1.5	LYAR_HUMAN	Q9NX58	Cell growth-regulating nucleolar protein	LYAR	44044	9.57	38	6	25
↑	0.026	1.5	KIF28_HUMAN	B7ZC32	Kinesin-like protein KIF28P	KIF28P	109098	8.68	66	21	25
↑	0.027	1.4	LIPA3_HUMAN	O75145	Liprin-alpha-3	PPFIA3	133984	5.53	64	22	30
↑	0.028	1.7	K1C9_HUMAN	P35527	Keratin, type I cytoskeletal 9	KRT9	62255	5.14	40	8	29
↑	0.03	1.3	K2C1_HUMAN	P04264	Keratin, type II cytoskeletal 1	KRT1	66170	8.15	68	15	34
↑	0.031	1.4	TBB5_HUMAN	P07437	Tubulin beta chain	TUBB	50095	4.78	189	27	57
↑	0.032	1.3	PSME2_HUMAN	Q9UL46	Proteasome activator complex subunit 2	PSME2	27555	5.54	112	16	58
↑	0.035	1.3	MYH4_HUMAN	Q9Y623	Myosin-4	MYH4	223902	5.65	64	24	20
↑	0.04	1.3	PP14B_HUMAN	Q96C90	Protein phosphatase 1 regulatory subunit 14B	PPP1R14B	16015	4.75	41	5	51
↑	0.041	1.2	SARNP_HUMAN	P82979	SAP domain-containing ribonucleoprotein	SARNP	23713	6.1	32	5	25
↓	0.001	1.5	F227A_HUMAN	F5H4B4	Protein FAM227A	FAM227A	67002	9.39	33	9	28
↓	0.004	1.2	CP3A7_HUMAN	P24462	Cytochrome P450 3A7	CYP3A7	57776	9.16	44	13	31
↓	0.006	1.3	FABPH_HUMAN	P05413	Fatty acid-binding protein, heart	FABP3	14906	6.29	47	5	64
↓	0.006	1.6	MPPB_HUMAN	O75439	Mitochondrial-processing peptidase subunit beta	PMPCB	55073	6.38	41	7	23
↓	0.007	1.4	ATG12_HUMAN	O94817	Ubiquitin-like protein ATG12	ATG12	15218	5.01	42	4	18
↓	0.008	1.4	HNRPK_HUMAN	P61978	Heterogeneous nuclear ribonucleoprotein K	HNRNPK	51230	5.39	86	19	41
↓	0.008	1.5	FABPH_HUMAN	P05413	Fatty acid-binding protein, heart	FABP3	14906	6.29	43	4	54
↓	0.008	1.8	KIF28_HUMAN	B7ZC32	Kinesin-like protein KIF28P	KIF28P	109098	8.68	46	15	20
↓	0.011	1.4	SYHM_HUMAN	P49590	Histidine--tRNA ligase, mitochondrial	HARS2	57593	8.52	40	10	21
↓	0.017	1.5	DB108_HUMAN	A8MXU0	Putative beta-defensin 108A	DEFB108A	8726	8.9	24	3	34
↓	0.017	1.7	MIC60_HUMAN	Q16891	MICOS complex subunit MIC60	IMMT	84025	6.08	35	6	12
↓	0.018	1.5	THIL_HUMAN	P24752	Acetyl-CoA acetyltransferase, mitochondrial	ACAT1	45456	8.98	35	7	31
↓	0.022	1.2	SMAD2_HUMAN	Q15796	Mothers against decapentaplegic homolog 2	SMAD2	53185	6.13	52	8	31
↓	0.024	1.4	ACTB_HUMAN	P60709	Actin, cytoplasmic 1	ACTB	42052	5.29	110	17	44
↓	0.031	1.2	GCP2_HUMAN	Q9BSJ2	Gamma-tubulin complex component 2	TUBGCP2	103096	6.38	48	15	29
↓	0.036	1.5	HSPB1_HUMAN	P04792	Heat shock protein beta-1	HSPB1	22826	5.98	51	9	53
↓	0.039	1.6	HSPB3_HUMAN	Q12988	Heat shock protein beta-3	HSPB3	17069	5.66	38	5	44
↓	0.041	1.6	CF298_HUMAN	P57076	Cilia- and flagella-associated protein 298	CFAP298	33374	6.99	34	8	26
↓	0.043	1.2	ETDC_HUMAN	A0A1B0GVM5	Embryonic testis differentiation protein homolog C	ETDC	6853	10.18	36	4	62
↓	0.045	1.4	MIC60_HUMAN	Q16891	MICOS complex subunit MIC60	IMMT	84025	6.08	29	5	10
↓	0.043	1.9	K1C9_HUMAN	P35527	Keratin, type I cytoskeletal 9	KRT9	62255	5.14	60	10	26
↓	0.022	1.7	EXOS6_HUMAN	Q5RKV6	Exosome complex component MTR3	EXOSC6	28503	6.06	40	4	22
↓	0.017	1.7	RLP24_HUMAN	Q9UHA3	Probable ribosome biogenesis protein RLP24	RSL24D1	19893	9.99	35	4	19
↓	0.029	1.7	FICD_HUMAN	Q9BVA6	Protein adenylyltransferase FICD	FICD	51916	7.31	24	4	9
↓	0.006	1.7	ZRAB3_HUMAN	Q5FWF4	DNA annealing helicase and endonuclease ZRANB3	ZRANB3	124823	8.74	33	6	10
↓	0.028	1.7	TOM34_HUMAN	Q15785	Mitochondrial import receptor subunit TOM34	TOMM34	34937	9.12	46	5	27
↓	0.018	1.7	KIF12_HUMAN	Q96FN5	Kinesin-like protein KIF12	KIF12	71813	9.19	30	5	15
↓	0.048	1.7	F227A_HUMAN	F5H4B4	Protein FAM227A	FAM227A	67002	9.39	39	6	19
↓	0.038	1.6	TEX51_HUMAN	A0A1B0GUA7	Testis-expressed protein 51	TEX51	19229	7.59	50	4	33
↓	0.016	1.6	SPB9_HUMAN	P50453	Serpin B9	SERPINB9	43004	5.61	27	6	20
↓	0.006	1.5	AP1M2_HUMAN	Q9Y6Q5	AP-1 complex subunit mu-2	AP1M2	48192	8.22	41	7	18
↓	0.012	1.4	CBR1_HUMAN	P16152	Carbonyl reductase [NADPH] 1	CBR1	30641	8.55	115	12	60
↓	0.029	1.4	K1C9_HUMAN	P35527	Keratin, type I cytoskeletal 9	KRT9	62255	5.14	58	9	24
↓	0.024	1.4	K1C9_HUMAN	P35527	Keratin, type I cytoskeletal 9	KRT9	62255	5.14	61	9	25
↓	0.01	1.4	MRP1_HUMAN	P33527	Multidrug resistance-associated protein 1	ABCC1	172907	6.71	41	10	10
↓	0.011	1.4	SEM4A_HUMAN	Q9H3S1	Semaphorin-4A	SEMA4A	84661	6.38	30	4	7
↓	0.014	1.4	XAGE3_HUMAN	Q8WTP9	X antigen family member 3	XAGE3	12352	4.4	35	4	34
↓	0.025	1.4	ACADM_HUMAN	P11310	Medium-chain specific acyl-CoA dehydrogenase, mitochondrial	ACADM	47015	8.61	51	7	21
↓	0.042	1.4	TWF2_HUMAN	Q6IBS0	Twinfilin-2	TWF2	39751	6.37	68	8	34
↓	0.031	1.4	PSD13_HUMAN	Q9UNM6	26S proteasome non-ATPase regulatory subunit 13	PSMD13	43203	5.53	105	12	36
↓	0.044	1.4	GFPT1_HUMAN	Q06210	Glutamine--fructose-6-phosphate aminotransferase [isomerizing] 1	GFPT1	79555	6.66	50	12	21
↓	0.02	1.3	ROA3_HUMAN	P51991	Heterogeneous nuclear ribonucleoprotein A3	HNRNPA3	39799	9.1	100	15	34
↓	0.031	1.3	SYDC_HUMAN	P14868	Aspartate--tRNA ligase, cytoplasmic	P14868	57499	6.11	70	8	20
↓	0.049	1.3	CPNE3_HUMAN	O75131	Copine-3	CPNE3	60947	5.6	85	12	19
↓	0.006	1.3	MIC60_HUMAN	Q16891	MICOS complex subunit MIC60	IMMT	84026	6.08	142	16	30
↓	0.038	1.3	FSCN1_HUMAN	Q16658	Fascin	FSCN1	55123	6.84	153	19	45
↓	0.003	1.3	APT_HUMAN	P07741	Adenine phosphoribosyltransferase	APRT	19766	5.78	93	8	62
↓	0.017	1.3	TRM44_HUMAN	Q8IYL2	Probable tRNA (uracil-O(2)-)-methyltransferase	TRMT44	85944	6.98	40	6	10
↓	0.027	1.3	TBB5_HUMAN	P07437	Tubulin beta chain	TUBB	50095	4.78	80	12	30
↓	0.014	1.3	IPYR_HUMAN	Q15181	Inorganic pyrophosphatase	PPA1	33095	5.54	44	7	35
↓	0.022	1.3	ECHM_HUMAN	P30084	Enoyl-CoA hydratase, mitochondrial	ECHS1	31823	8.34	137	15	50
↓	0.033	1.3	LASP1_HUMAN	Q14847	LIM and SH3 domain protein 1	LASP1	30097	6.61	79	12	33
↓	0.035	1.2	GLU2B_HUMAN	P14314	Glucosidase 2 subunit beta	PRKCSH	60357	4.33	168	21	36
↓	0.041	1.2	PHB_HUMAN	Q99623	Prohibitin	PHB2	29843	5.57	145	14	67
↓	0.046	1.2	PRDX3_HUMAN	P30048	Thioredoxin-dependent peroxide reductase, mitochondrial	PRDX3	28017	7.67	48	4	24
↓	0.002	1.2	FA50A_HUMAN	Q14320	Protein FAM50A	FAM50A	40216	6.39	64	10	31
↓	0.041	1.2	INT1_HUMAN	Q8N201	Integrator complex subunit 1	INTS1	246366	5.77	43	11	6
↓	0.047	1.2	PDIA1_HUMAN	P07237	Protein disulfide-isomerase	P4HB	57480	4.76	100	12	28
↓	0.019	1.1	PITH1_HUMAN	Q9GZP4	PITH domain-containing protein 1	PITHD1	24391	5.47	126	9	45
↓	0.047	1.1	PRDX2_HUMAN	P32119	Peroxiredoxin-2	PRDX2	22049	5.66	162	11	51
↓	0.025	1.1	HSPB1_HUMAN	P04792	Heat shock protein beta-1	HSPB1	22826	5.98	206	16	67
↓	0.042	1.1	LDHA_HUMAN	P00338	L-lactate dehydrogenase A chain	LDHA	36950	8.44	96	20	44
↓	0.042	1.1	ANXA2_HUMAN	P07355	Annexin A2	ANXA2	38808	7.57	92	16	43
↓	0.012	1.7	DC1L1_HUMAN	Q9Y6G9	Cytoplasmic dynein 1 light intermediate chain 1	DYNC1LI1	56829	6.01	37	7	24
↓	0.047	1.2	AMERL_HUMAN	Q6DCA0	AMMECR1-like protein	AMMECR1L	35048	9.18	51	6	26
