# Supplementary material for: Ezrin Inhibition Overcomes Acquired Resistance to Vemurafenib in BRAFV600E-Mutated Colon Cancer and Melanoma Cells In Vitro
Source: Int J Mol Sci. 2023 Aug 17;24(16):12906. doi: 10.3390/ijms241612906 (PMC10454476; doi:10.3390/ijms241612906)
Supplement: Supplementary file 1 [file ijms-24-12906-s001.zip › Supplementary Table S2.xlsx]

## Sheet: UpReg 5-7
Table S2. List of differentially expressed proteins between vemurafenib-sensitive and vemuraf-enib-resistant RKO colon cancer cells with BRAFV600E mutation identified by label-free quantita-tive LC-MS/MS analysis. Only proteins with statistically significant changes (p<0.05, log2(FC)>1) in the abundance were taken into consideration
	ProteinName	TopProteinName	nrPeptides	Fasta.headers	RKO	RKOR	proteinID	log2FC	CI.L	CI.R	AveExpr	t	P.Value	adj.P.Val	nrNAs	003_S211427_cell_5_RKO.raw	006_S211425_cell_3_RKO.raw	010_S211423_cell_1_RKO.raw	013_S211428_cell_6_RKO.raw	016_S211429_cell_7_RKO.raw	017_S211426_cell_4_RKO.raw	019_S211424_cell_2_RKO.raw	002_S211433_cell_11_RKO.R.raw	004_S211430_cell_8_RKO.R.raw	005_S211436_cell_14_RKO.R.raw	009_S211434_cell_12_RKO.R.raw	011_S211435_cell_13_RKO.R.raw	012_S211432_cell_10_RKO.R.raw	018_S211431_cell_9_RKO.R.raw	003_S211427_cell_5_RKO.transformed	006_S211425_cell_3_RKO.transformed	010_S211423_cell_1_RKO.transformed	013_S211428_cell_6_RKO.transformed	016_S211429_cell_7_RKO.transformed	017_S211426_cell_4_RKO.transformed	019_S211424_cell_2_RKO.transformed	002_S211433_cell_11_RKO.R.transformed	004_S211430_cell_8_RKO.R.transformed	005_S211436_cell_14_RKO.R.transformed	009_S211434_cell_12_RKO.R.transformed	011_S211435_cell_13_RKO.R.transformed	012_S211432_cell_10_RKO.R.transformed	018_S211431_cell_9_RKO.R.transformed	pseudo.RKO	pseudo.RKOR	pseudo.log2FC	pseudo.P.Value	pseudo.adj.P.Val
1167	sp|P35754|GLRX1_HUMAN	sp|P35754|GLRX1_HUMAN	4	sp|P35754|GLRX1_HUMAN Glutaredoxin-1 OS=Homo sapiens OX=9606 GN=GLRX PE=1 SV=2	-2.84337	NA	sp|P35754|GLRX1_HUMAN	NA	NA	NA	-2.84337	NA	NA	NA	7	39388000	13161000	5850400	26832000	29681000	8393200	26609000	NA	NA	NA	NA	NA	NA	NA	-2.06559	-2.75246	-3.99342	-1.49975	-3.10353	-4.24103	-2.24782	NA	NA	NA	NA	NA	NA	NA	-2.84337	-3.88332	-1.03995	0	0
2243	sp|Q15833|STXB2_HUMAN	sp|Q15833|STXB2_HUMAN	7	sp|Q15833|STXB2_HUMAN Syntaxin-binding protein 2 OS=Homo sapiens OX=9606 GN=STXBP2 PE=1 SV=2	-2.23833	NA	sp|Q15833|STXB2_HUMAN	NA	NA	NA	-2.23833	NA	NA	NA	7	11429000	14631000	18463000	55858000	159480000	15948000	23471000	NA	NA	NA	NA	NA	NA	NA	-3.85103	-2.60137	-2.37294	-0.437729	-0.661207	-3.31698	-2.42707	NA	NA	NA	NA	NA	NA	NA	-2.23833	-3.88332	-1.64499	0	0
2093	sp|Q14627|I13R2_HUMAN	sp|Q14627|I13R2_HUMAN	11	sp|Q14627|I13R2_HUMAN Interleukin-13 receptor subunit alpha-2 OS=Homo sapiens OX=9606 GN=IL13RA2 PE=1 SV=1	-1.26446	3.03062	sp|Q14627|I13R2_HUMAN	4.29508	3.52869	5.06146	0.883079	12.0167	8.88461e-09	8.61836e-06	0	77657000	67177000	29763000	15457000	99548000	205010000	24706000	1502500000	1401500000	1884300000	1335500000	1272600000	1166900000	1162700000	-1.08602	-0.426524	-1.69966	-2.29861	-1.34576	0.359179	-2.35382	2.96628	2.89605	3.3997	3.05311	3.13149	3.05729	2.71041	-1.26446	3.03062	4.29508	8.88461e-09	8.61836e-06
2401	sp|Q5SVZ6|ZMYM1_HUMAN	sp|Q5SVZ6|ZMYM1_HUMAN	3	sp|Q5SVZ6|ZMYM1_HUMAN Zinc finger MYM-type protein 1 OS=Homo sapiens OX=9606 GN=ZMYM1 PE=1 SV=1	-3.92491	-0.308541	sp|Q5SVZ6|ZMYM1_HUMAN	3.61637	2.22268	5.01005	-1.81536	5.65142	0.000105619	0.00472568	2	18406000	NA	3196400	NA	4227900	50632000	7657100	143070000	133540000	168390000	92406000	59086000	133590000	394190000	-3.16341	NA	-4.84576	NA	-5.93425	-1.65397	-4.02715	-0.445259	-0.519842	-0.166841	-0.794496	-1.33176	-0.0538852	1.1523	-3.92491	-0.308541	3.61637	0.000105619	0.00472568
1639	sp|P62328|TYB4_HUMAN	sp|P62328|TYB4_HUMAN	5	sp|P62328|TYB4_HUMAN Thymosin beta-4 OS=Homo sapiens OX=9606 GN=TMSB4X PE=1 SV=2	-3.73961	-0.222174	sp|P62328|TYB4_HUMAN	3.51743	2.55571	4.47915	-1.8456	7.89877	2.51641e-06	0.000295552	1	17566000	4294500	1929600	11543000	51259000	8240200	NA	216890000	240890000	130310000	146250000	118450000	113360000	104350000	-3.23081	-4.35046	-5.55742	-2.72153	-2.30988	-4.26752	NA	0.158339	0.337349	-0.545446	-0.133087	-0.320571	-0.289602	-0.762199	-3.73961	-0.222174	3.51743	2.51641e-06	0.000295552
4144	sp|Q9NZQ7|PD1L1_HUMAN	sp|Q9NZQ7|PD1L1_HUMAN	5	sp|Q9NZQ7|PD1L1_HUMAN Programmed cell death 1 ligand 1 OS=Homo sapiens OX=9606 GN=CD274 PE=1 SV=1	-2.74919	0.603882	sp|Q9NZQ7|PD1L1_HUMAN	3.35307	2.71154	3.99461	-1.07265	11.2068	2.16992e-08	1.27429e-05	0	17013000	11694000	18187000	17152000	85774000	20135000	8021600	284120000	323020000	379190000	236410000	204630000	231550000	191560000	-3.27697	-2.92109	-2.39418	-2.1479	-1.56208	-2.98139	-3.96072	0.550053	0.763626	1.03197	0.558753	0.4743	0.735662	0.112813	-2.74919	0.603882	3.35307	2.16992e-08	1.27429e-05
1805	sp|Q03135|CAV1_HUMAN	sp|Q03135|CAV1_HUMAN	5	sp|Q03135|CAV1_HUMAN Caveolin-1 OS=Homo sapiens OX=9606 GN=CAV1 PE=1 SV=4	-3.33459	-0.15167	sp|Q03135|CAV1_HUMAN	3.18292	2.38318	3.98266	-1.74313	8.53372	6.26593e-07	0.00011322	0	18655000	7034500	14551000	5289300	8820200	26021000	22103000	286190000	265540000	137990000	141850000	166810000	103250000	76113000	-3.14402	-3.64631	-2.70868	-3.85189	-4.86614	-2.61223	-2.51286	0.560585	0.47891	-0.460877	-0.177093	0.177196	-0.423698	-1.21671	-3.33459	-0.15167	3.18292	6.26593e-07	0.00011322
3607	sp|Q9BV73|CP250_HUMAN	sp|Q9BV73|CP250_HUMAN	21	sp|Q9BV73|CP250_HUMAN Centrosome-associated protein CEP250 OS=Homo sapiens OX=9606 GN=CEP250 PE=1 SV=2	-2.84941	0.169996	sp|Q9BV73|CP250_HUMAN	3.0194	1.78374	4.25507	-1.33971	5.23939	0.000124005	0.00518876	0	44534000	5890400	10889000	8766300	281520000	8388700	8712000	287110000	284930000	347790000	143550000	179490000	114630000	108120000	-1.8884	-3.89958	-3.11746	-3.12009	0.164252	-4.2418	-3.84278	0.565241	0.581315	0.904313	-0.159931	0.283716	-0.273609	-0.711076	-2.84941	0.169996	3.0194	0.000124005	0.00518876
2928	sp|Q8NC26|ZN114_HUMAN	sp|Q8NC26|ZN114_HUMAN	6	sp|Q8NC26|ZN114_HUMAN Zinc finger protein 114 OS=Homo sapiens OX=9606 GN=ZNF114 PE=1 SV=1	-4.05686	-1.16756	sp|Q8NC26|ZN114_HUMAN	2.88929	1.45229	4.3263	-2.61221	4.31117	0.000713103	0.0157646	0	48485000	23490000	9821700	1561700	18187000	1481700	3202900	107860000	94771000	81313000	60403000	76543000	57785000	65250000	-1.76575	-1.92584	-3.26291	-5.61886	-3.81499	-6.73751	-5.27217	-0.855099	-1.01814	-1.24193	-1.40696	-0.955405	-1.25689	-1.43853	-4.05686	-1.16756	2.88929	0.000713103	0.0157646
3043	sp|Q8WTS1|ABHD5_HUMAN	sp|Q8WTS1|ABHD5_HUMAN	6	sp|Q8WTS1|ABHD5_HUMAN 1-acylglycerol-3-phosphate O-acyltransferase ABHD5 OS=Homo sapiens OX=9606 GN=ABHD5 PE=1 SV=1	-3.05864	-0.202061	sp|Q8WTS1|ABHD5_HUMAN	2.85657	2.15267	3.56048	-1.63035	8.70144	4.96608e-07	9.33226e-05	0	40767000	6196800	6140000	4871400	59799000	18015000	23206000	162690000	128500000	192950000	158240000	160850000	129110000	115500000	-2.01594	-3.82723	-3.9253	-3.9711	-2.08605	-3.14154	-2.44329	-0.258818	-0.575743	0.0342239	-0.0195758	0.124298	-0.102851	-0.615963	-3.05864	-0.202061	2.85657	4.96608e-07	9.33226e-05
508	sp|O94851|MICA2_HUMAN	sp|O94851|MICA2_HUMAN	18	sp|O94851|MICA2_HUMAN [F-actin]-monooxygenase MICAL2 OS=Homo sapiens OX=9606 GN=MICAL2 PE=1 SV=1	-1.77682	1.00314	sp|O94851|MICA2_HUMAN	2.77996	2.27559	3.28433	-0.386838	11.8182	1.10069e-08	8.61836e-06	0	58610000	38524000	42924000	20262000	37911000	51880000	26220000	304290000	578610000	337910000	334760000	278970000	297260000	313220000	-1.49208	-1.21995	-1.18335	-1.90654	-2.74804	-1.61891	-2.26886	0.649553	1.61061	0.861753	1.05985	0.924869	1.09426	0.821098	-1.77682	1.00314	2.77996	1.10069e-08	8.61836e-06
148	sp|O00592|PODXL_HUMAN	sp|O00592|PODXL_HUMAN	7	sp|O00592|PODXL_HUMAN Podocalyxin OS=Homo sapiens OX=9606 GN=PODXL PE=1 SV=2	-1.75344	0.873681	sp|O00592|PODXL_HUMAN	2.62713	2.02278	3.23147	-0.439882	9.32083	2.16164e-07	5.64188e-05	0	61482000	37359000	34094000	29012000	24691000	64111000	31484000	309910000	357820000	443510000	274850000	292690000	261700000	265350000	-1.42305	-1.26376	-1.5081	-1.38661	-3.3709	-1.31419	-2.00751	0.676103	0.912293	1.26336	0.775788	0.994671	0.91137	0.582188	-1.75344	0.873681	2.62713	2.16164e-07	5.64188e-05
2583	sp|Q6WCQ1|MPRIP_HUMAN	sp|Q6WCQ1|MPRIP_HUMAN	14	sp|Q6WCQ1|MPRIP_HUMAN Myosin phosphatase Rho-interacting protein OS=Homo sapiens OX=9606 GN=MPRIP PE=1 SV=3	-2.04342	0.468327	sp|Q6WCQ1|MPRIP_HUMAN	2.51174	1.84726	3.17622	-0.787545	8.105	1.15216e-06	0.000193315	0	31873000	23428000	19430000	10869000	109340000	92400000	16902000	290310000	368170000	226810000	215190000	172430000	134650000	322720000	-2.37108	-1.92961	-2.30096	-2.80868	-1.20948	-0.788027	-2.89609	0.581321	0.953725	0.272997	0.423272	0.225373	-0.0425399	0.864138	-2.04342	0.468327	2.51174	1.15216e-06	0.000193315
4527	sp|Q9Y446|PKP3_HUMAN	sp|Q9Y446|PKP3_HUMAN	13	sp|Q9Y446|PKP3_HUMAN Plakophilin-3 OS=Homo sapiens OX=9606 GN=PKP3 PE=1 SV=1	-1.82668	0.374325	sp|Q9Y446|PKP3_HUMAN	2.201	1.54164	2.86037	-0.726176	7.15741	4.7952e-06	0.000459752	0	91286000	24248000	35275000	25955000	22969000	55778000	30454000	224540000	339110000	212410000	218350000	223710000	147280000	213190000	-0.852696	-1.88052	-1.46008	-1.54788	-3.47591	-1.51463	-2.05503	0.208627	0.834258	0.176127	0.444272	0.603912	0.0861611	0.266918	-1.82668	0.374325	2.201	4.7952e-06	0.000459752
2407	sp|Q5T0N5|FBP1L_HUMAN	sp|Q5T0N5|FBP1L_HUMAN	7	sp|Q5T0N5|FBP1L_HUMAN Formin-binding protein 1-like OS=Homo sapiens OX=9606 GN=FNBP1L PE=1 SV=3	-3.91106	-1.72423	sp|Q5T0N5|FBP1L_HUMAN	2.18683	1.1315	3.24216	-2.81765	4.44312	0.000552765	0.0134311	0	6160900	14473000	8035500	9129400	29425000	2567200	6115800	87550000	71968000	85046000	44234000	29394000	15952000	87802000	-4.74271	-2.61686	-3.54594	-3.06131	-3.11611	-5.94631	-4.34821	-1.15776	-1.41807	-1.17564	-1.85577	-2.34689	-3.10457	-1.01092	-3.91106	-1.72423	2.18683	0.000552765	0.0134311
2259	sp|Q16527|CSRP2_HUMAN	sp|Q16527|CSRP2_HUMAN	7	sp|Q16527|CSRP2_HUMAN Cysteine and glycine-rich protein 2 OS=Homo sapiens OX=9606 GN=CSRP2 PE=1 SV=3	-1.94097	0.173865	sp|Q16527|CSRP2_HUMAN	2.11483	1.6039	2.62576	-0.883552	8.87515	3.91629e-07	9.33226e-05	0	22307000	17426000	20856000	24482000	110780000	52706000	38273000	159510000	212610000	257380000	230380000	129880000	145410000	248240000	-2.88603	-2.35192	-2.2011	-1.63251	-1.19047	-1.59618	-1.72858	-0.287456	0.155895	0.459726	0.521532	-0.186637	0.0678181	0.486175	-1.94097	0.173865	2.11483	3.91629e-07	9.33226e-05
2088	sp|Q14554|PDIA5_HUMAN	sp|Q14554|PDIA5_HUMAN	4	sp|Q14554|PDIA5_HUMAN Protein disulfide-isomerase A5 OS=Homo sapiens OX=9606 GN=PDIA5 PE=1 SV=1	-3.98357	-1.99577	sp|Q14554|PDIA5_HUMAN	1.9878	1.09667	2.87894	-2.98967	4.7829	0.000289384	0.00867902	0	24747000	4684800	1781600	2574000	32323000	14609000	8170200	53677000	34575000	53629000	20358000	47461000	45752000	60519000	-2.73624	-4.22634	-5.66994	-4.89509	-2.97967	-3.44322	-3.9345	-1.86751	-2.48326	-1.8566	-2.97369	-1.65029	-1.59207	-1.54696	-3.98357	-1.99577	1.9878	0.000289384	0.00867902
2517	sp|Q6NZI2|CAVN1_HUMAN	sp|Q6NZI2|CAVN1_HUMAN	11	sp|Q6NZI2|CAVN1_HUMAN Caveolae-associated protein 1 OS=Homo sapiens OX=9606 GN=CAVIN1 PE=1 SV=1	-0.029216	1.95428	sp|Q6NZI2|CAVN1_HUMAN	1.9835	1.5675	2.39949	0.962532	10.2236	6.90225e-08	2.70223e-05	0	117230000	89491000	137970000	86891000	143430000	178680000	157610000	773180000	1046200000	622830000	651420000	555790000	479230000	582880000	-0.491743	-0.0172823	0.463	0.202253	-0.81528	0.161298	0.293243	2.00243	2.47122	1.76481	2.01891	1.92703	1.77981	1.71574	-0.029216	1.95428	1.9835	6.90225e-08	2.70223e-05
776	sp|P10586|PTPRF_HUMAN	sp|P10586|PTPRF_HUMAN	12	sp|P10586|PTPRF_HUMAN Receptor-type tyrosine-protein phosphatase F OS=Homo sapiens OX=9606 GN=PTPRF PE=1 SV=2	-2.95878	-1.03683	sp|P10586|PTPRF_HUMAN	1.92195	0.988593	2.8553	-1.99781	4.41526	0.000583218	0.0138382	0	7048300	24669000	16554000	3059900	66456000	38379000	14150000	127190000	84304000	96762000	58755000	66973000	79990000	83566000	-4.54854	-1.85596	-2.52683	-4.64462	-1.93273	-2.05282	-3.14995	-0.615944	-1.18819	-0.985037	-1.44681	-1.14959	-0.790109	-1.08215	-2.95878	-1.03683	1.92195	0.000583218	0.0138382
159	sp|O14578|CTRO_HUMAN	sp|O14578|CTRO_HUMAN	11	sp|O14578|CTRO_HUMAN Citron Rho-interacting kinase OS=Homo sapiens OX=9606 GN=CIT PE=1 SV=2	-3.25639	-1.36043	sp|O14578|CTRO_HUMAN	1.89596	0.973808	2.81811	-2.30841	4.40847	0.000590894	0.0139499	0	3897100	8940300	12624000	5590500	39986000	39307000	19157000	68162000	127960000	91666000	37081000	41980000	48095000	95071000	-5.40359	-3.30422	-2.90899	-3.77167	-2.67064	-2.01843	-2.71719	-1.52092	-0.581862	-1.06494	-2.10987	-1.82871	-1.52037	-0.896345	-3.25639	-1.36043	1.89596	0.000590894	0.0139499
994	sp|P23634|AT2B4_HUMAN	sp|P23634|AT2B4_HUMAN	12	sp|P23634|AT2B4_HUMAN Plasma membrane calcium-transporting ATPase 4 OS=Homo sapiens OX=9606 GN=ATP2B4 PE=1 SV=2	-1.20297	0.610583	sp|P23634|AT2B4_HUMAN	1.81356	1.0196	2.60751	-0.296196	4.89776	0.000233238	0.00777128	0	129230000	47393000	51144000	24172000	162340000	99504000	13273000	311570000	329370000	176780000	236700000	210820000	250780000	346130000	-0.351113	-0.924304	-0.936297	-1.65097	-0.635389	-0.6814	-3.24135	0.683853	0.791913	-0.095034	0.560519	0.517629	0.850185	0.965013	-1.20297	0.610583	1.81356	0.000233238	0.00777128
4139	sp|Q9NZM1|MYOF_HUMAN	sp|Q9NZM1|MYOF_HUMAN	79	sp|Q9NZM1|MYOF_HUMAN Myoferlin OS=Homo sapiens OX=9606 GN=MYOF PE=1 SV=1	2.65081	4.43153	sp|Q9NZM1|MYOF_HUMAN	1.78072	1.32378	2.23767	3.54117	8.35587	8.0462e-07	0.000140004	0	1895700000	537420000	701150000	334440000	902250000	1208200000	919220000	3867400000	5287600000	3043600000	3401600000	2967900000	3046100000	4176400000	3.52444	2.54062	2.75526	2.15447	1.85601	2.91265	2.81221	4.3379	4.8254	4.10781	4.39997	4.36265	4.43465	4.55234	2.65081	4.43153	1.78072	8.0462e-07	0.000140004
200	sp|O15021|MAST4_HUMAN	sp|O15021|MAST4_HUMAN	3	sp|O15021|MAST4_HUMAN Microtubule-associated serine/threonine-protein kinase 4 OS=Homo sapiens OX=9606 GN=MAST4 PE=1 SV=4	-5.10777	-3.37467	sp|O15021|MAST4_HUMAN	1.7331	1.10614	2.36006	-4.17456	5.96987	4.60673e-05	0.0027053	1	11465000	1919600	1727100	1789100	NA	3236400	5302100	14279000	20922000	17582000	19200000	11426000	17448000	17157000	-3.8465	-5.49942	-5.71375	-5.42196	NA	-5.61285	-4.55215	-3.7886	-3.21315	-3.50356	-3.05806	-3.72069	-2.97589	-3.36274	-5.10777	-3.37467	1.7331	4.60673e-05	0.0027053
1418	sp|P51159|RB27A_HUMAN;sp|O00194|RB27B_HUMAN	sp|P51159|RB27A_HUMAN	4	sp|P51159|RB27A_HUMAN Ras-related protein Rab-27A OS=Homo sapiens OX=9606 GN=RAB27A PE=1 SV=3;sp|O00194|RB27B_HUMAN Ras-related protein Rab-27B OS=Homo sapiens OX=9606 GN=RAB27B PE=1 SV=4	-3.19679	-1.47123	sp|P51159|RB27A_HUMAN	1.72556	0.964308	2.48682	-2.26764	4.89536	0.000289755	0.00867902	1	27526000	4816900	5332900	NA	16822000	36224000	27074000	74828000	60719000	87400000	60669000	48885000	43084000	65801000	-2.58267	-4.18666	-4.12401	NA	-3.92831	-2.13601	-2.22308	-1.38556	-1.66503	-1.13532	-1.40063	-1.60731	-1.67832	-1.42642	-3.19679	-1.47123	1.72556	0.000289755	0.00867902
2853	sp|Q8N1G2|CMTR1_HUMAN	sp|Q8N1G2|CMTR1_HUMAN	11	sp|Q8N1G2|CMTR1_HUMAN Cap-specific mRNA (nucleoside-2-O-)-methyltransferase 1 OS=Homo sapiens OX=9606 GN=CMTR1 PE=1 SV=1	-0.096473	1.6108	sp|Q8N1G2|CMTR1_HUMAN	1.70727	0.936838	2.47771	0.757163	4.75147	0.000307068	0.00879639	0	267240000	68076000	86084000	49676000	84531000	314930000	175990000	514580000	527580000	783840000	533200000	407330000	687850000	304160000	0.697307	-0.407555	-0.202127	-0.607617	-1.58328	0.977156	0.450808	1.41174	1.47646	2.10438	1.73042	1.4752	2.29858	0.778818	-0.096473	1.6108	1.70727	0.000307068	0.00879639
2377	sp|Q5GLZ8|HERC4_HUMAN	sp|Q5GLZ8|HERC4_HUMAN	14	sp|Q5GLZ8|HERC4_HUMAN Probable E3 ubiquitin-protein ligase HERC4 OS=Homo sapiens OX=9606 GN=HERC4 PE=1 SV=1	-0.664732	0.990624	sp|Q5GLZ8|HERC4_HUMAN	1.65536	1.24879	2.06192	0.162946	8.73014	4.77386e-07	9.33226e-05	0	122450000	58483000	78664000	59723000	156580000	47830000	90064000	388120000	433340000	356800000	303500000	263050000	319460000	318120000	-0.428878	-0.624284	-0.329224	-0.340821	-0.687863	-1.73592	-0.506132	1.00257	1.19053	0.942085	0.918631	0.839437	1.19765	0.843458	-0.664732	0.990624	1.65536	4.77386e-07	9.33226e-05
2796	sp|Q8IWW6|RHG12_HUMAN	sp|Q8IWW6|RHG12_HUMAN	8	sp|Q8IWW6|RHG12_HUMAN Rho GTPase-activating protein 12 OS=Homo sapiens OX=9606 GN=ARHGAP12 PE=1 SV=1	-2.12074	-0.533271	sp|Q8IWW6|RHG12_HUMAN	1.58747	1.26529	1.90965	-1.32701	10.565	4.57423e-08	1.95361e-05	0	30366000	12836000	23639000	18665000	81677000	38354000	34443000	140310000	142590000	115390000	112500000	101740000	92431000	127420000	-2.44097	-2.78814	-2.02448	-2.02546	-1.63317	-2.05376	-1.8792	-0.473519	-0.424565	-0.725024	-0.511045	-0.541668	-0.582594	-0.474483	-2.12074	-0.533271	1.58747	4.57423e-08	1.95361e-05
3965	sp|Q9NRA2|S17A5_HUMAN	sp|Q9NRA2|S17A5_HUMAN	2	sp|Q9NRA2|S17A5_HUMAN Sialin OS=Homo sapiens OX=9606 GN=SLC17A5 PE=1 SV=2	-4.15427	-2.60735	sp|Q9NRA2|S17A5_HUMAN	1.54691	0.97569	2.11814	-3.32131	5.84849	5.62508e-05	0.00312081	1	13471000	2970100	5169500	NA	17174000	15423000	3864700	24354000	30797000	24647000	27348000	29759000	26233000	35548000	-3.61383	-4.87661	-4.16789	NA	-3.89823	-3.36517	-5.00386	-3.01403	-2.65139	-3.00472	-2.54848	-2.32895	-2.39051	-2.31339	-4.15427	-2.60735	1.54691	5.62508e-05	0.00312081
2073	sp|Q14244|MAP7_HUMAN	sp|Q14244|MAP7_HUMAN	10	sp|Q14244|MAP7_HUMAN Ensconsin OS=Homo sapiens OX=9606 GN=MAP7 PE=1 SV=1	-1.92299	-0.408572	sp|Q14244|MAP7_HUMAN	1.51441	1.09533	1.9335	-1.16578	7.74818	1.94519e-06	0.000261099	0	47504000	15098000	23992000	21781000	60277000	43845000	49260000	117900000	189460000	116500000	165850000	78183000	102500000	165150000	-1.79524	-2.55654	-2.00358	-1.80183	-2.07448	-1.86115	-1.36808	-0.725977	-0.0116107	-0.710886	0.0480896	-0.924583	-0.434164	-0.100876	-1.92299	-0.408572	1.51441	1.94519e-06	0.000261099
3299	sp|Q96GA3|LTV1_HUMAN	sp|Q96GA3|LTV1_HUMAN	5	sp|Q96GA3|LTV1_HUMAN Protein LTV1 homolog OS=Homo sapiens OX=9606 GN=LTV1 PE=1 SV=1	-3.11905	-1.60566	sp|Q96GA3|LTV1_HUMAN	1.51339	0.595202	2.43157	-2.36236	3.53411	0.00328966	0.0376947	0	11806000	14063000	4466500	10346000	83499000	7754700	28274000	64745000	72697000	102960000	46389000	25191000	38731000	79298000	-3.8042	-2.65787	-4.374	-2.88011	-1.60112	-4.35493	-2.16112	-1.59553	-1.40342	-0.893347	-1.78724	-2.57123	-1.83121	-1.15766	-3.11905	-1.60566	1.51339	0.00328966	0.0376947
325	sp|O43852|CALU_HUMAN	sp|O43852|CALU_HUMAN	15	sp|O43852|CALU_HUMAN Calumenin OS=Homo sapiens OX=9606 GN=CALU PE=1 SV=2	2.05702	3.54174	sp|O43852|CALU_HUMAN	1.48471	1.05488	1.91454	2.79938	7.40641	3.26047e-06	0.000343428	0	724660000	406910000	346190000	360980000	961920000	611060000	604330000	2967500000	2702800000	3144800000	1757400000	1425700000	850970000	1987600000	2.13678	2.14368	1.76016	2.26508	1.94903	1.93134	2.2131	3.95365	3.85031	4.15611	3.4486	3.29665	2.60406	3.48276	2.05702	3.54174	1.48471	3.26047e-06	0.000343428
750	sp|P09493|TPM1_HUMAN	sp|P09493|TPM1_HUMAN	18	sp|P09493|TPM1_HUMAN Tropomyosin alpha-1 chain OS=Homo sapiens OX=9606 GN=TPM1 PE=1 SV=2	-1.50784	-0.0285829	sp|P09493|TPM1_HUMAN	1.47926	0.886697	2.07182	-0.768211	5.35268	0.000100906	0.00455822	0	33295000	40216000	25645000	31828000	135070000	63478000	39180000	128210000	141010000	300560000	113530000	192130000	101340000	292400000	-2.3081	-1.15861	-1.90963	-1.25243	-0.902511	-1.32847	-1.69512	-0.604356	-0.440755	0.688771	-0.497915	0.382658	-0.450502	0.722018	-1.50784	-0.0285829	1.47926	0.000100906	0.00455822
1096	sp|P30530|UFO_HUMAN	sp|P30530|UFO_HUMAN	12	sp|P30530|UFO_HUMAN Tyrosine-protein kinase receptor UFO OS=Homo sapiens OX=9606 GN=AXL PE=1 SV=4	-0.577641	0.870743	sp|P30530|UFO_HUMAN	1.44838	1.02378	1.87299	0.146551	7.31411	3.75813e-06	0.000367827	0	102290000	63751000	69820000	25336000	239220000	139160000	90276000	399940000	322220000	369530000	296340000	228170000	318990000	265470000	-0.688461	-0.501216	-0.497391	-1.58285	-0.0722513	-0.198544	-0.502774	1.04609	0.760023	0.993857	0.884238	0.632613	1.19554	0.582839	-0.577641	0.870743	1.44838	3.75813e-06	0.000367827
2612	sp|Q712K3|UB2R2_HUMAN	sp|Q712K3|UB2R2_HUMAN	5	sp|Q712K3|UB2R2_HUMAN Ubiquitin-conjugating enzyme E2 R2 OS=Homo sapiens OX=9606 GN=UBE2R2 PE=1 SV=1	-3.01762	-1.59332	sp|Q712K3|UB2R2_HUMAN	1.4243	0.604122	2.24447	-2.30547	3.72353	0.00225835	0.0304003	0	20859000	20526000	4244200	15524000	29952000	34833000	7797900	83043000	67147000	76112000	48037000	66391000	19432000	69873000	-2.98288	-2.1183	-4.44598	-2.29235	-3.09033	-2.19238	-4.00112	-1.23444	-1.51882	-1.33954	-1.73695	-1.16228	-2.82129	-1.33993	-3.01762	-1.59332	1.4243	0.00225835	0.0304003
701	sp|P07311|ACYP1_HUMAN	sp|P07311|ACYP1_HUMAN	5	sp|P07311|ACYP1_HUMAN Acylphosphatase-1 OS=Homo sapiens OX=9606 GN=ACYP1 PE=1 SV=2	-1.46151	-0.06484	sp|P07311|ACYP1_HUMAN	1.39667	1.00146	1.79188	-0.763175	7.57753	2.51284e-06	0.000295552	0	67138000	28516000	30633000	18949000	102520000	80082000	50743000	164000000	183640000	298850000	127460000	108570000	127240000	186220000	-1.29606	-1.64918	-1.65903	-2.00358	-1.30303	-0.993989	-1.32571	-0.247183	-0.0569457	0.680344	-0.331189	-0.447201	-0.123794	0.072088	-1.46151	-0.06484	1.39667	2.51284e-06	0.000295552
567	sp|O95486|SC24A_HUMAN	sp|O95486|SC24A_HUMAN	10	sp|O95486|SC24A_HUMAN Protein transport protein Sec24A OS=Homo sapiens OX=9606 GN=SEC24A PE=1 SV=2	-1.4018	-0.0138801	sp|O95486|SC24A_HUMAN	1.38792	0.86732	1.90853	-0.707842	5.71636	5.26792e-05	0.00298177	0	77811000	34738000	18449000	24271000	74274000	123630000	55303000	138270000	221200000	180800000	166690000	135480000	158030000	193670000	-1.08317	-1.36755	-2.37401	-1.64505	-1.77118	-0.368885	-1.20279	-0.494767	0.213446	-0.0618273	0.0553675	-0.125263	0.18729	0.128593	-1.4018	-0.0138801	1.38792	5.26792e-05	0.00298177
1918	sp|Q13017|RHG05_HUMAN	sp|Q13017|RHG05_HUMAN	7	sp|Q13017|RHG05_HUMAN Rho GTPase-activating protein 5 OS=Homo sapiens OX=9606 GN=ARHGAP5 PE=1 SV=2	-3.81227	-2.42442	sp|Q13017|RHG05_HUMAN	1.38786	0.680125	2.09559	-3.11835	4.20471	0.000876879	0.0175301	0	12740000	4237100	7360000	5033300	11658000	37747000	5535000	33404000	50635000	27078000	40915000	32851000	19899000	27560000	-3.69433	-4.36966	-3.66975	-3.92374	-4.46095	-2.07672	-4.49074	-2.55562	-1.92892	-2.8658	-1.96813	-2.18523	-2.7872	-2.68002	-3.81227	-2.42442	1.38786	0.000876879	0.0175301
1838	sp|Q06481|APLP2_HUMAN	sp|Q06481|APLP2_HUMAN	3	sp|Q06481|APLP2_HUMAN Amyloid-like protein 2 OS=Homo sapiens OX=9606 GN=APLP2 PE=1 SV=2	-2.72327	-1.3389	sp|Q06481|APLP2_HUMAN	1.38437	0.504823	2.26392	-2.03108	3.37484	0.00451722	0.0460345	0	8485600	13459000	7359500	6300600	99015000	46849000	39763000	73857000	77032000	65553000	67518000	59175000	53201000	80457000	-4.28074	-2.72051	-3.66985	-3.59847	-1.35356	-1.76575	-1.67402	-1.40451	-1.31926	-1.5601	-1.24655	-1.32957	-1.37554	-1.13676	-2.72327	-1.3389	1.38437	0.00451722	0.0460345
2428	sp|Q5T9L3|WLS_HUMAN	sp|Q5T9L3|WLS_HUMAN	3	sp|Q5T9L3|WLS_HUMAN Protein wntless homolog OS=Homo sapiens OX=9606 GN=WLS PE=1 SV=2	-3.20858	-1.83792	sp|Q5T9L3|WLS_HUMAN	1.37066	0.518033	2.22329	-2.52325	3.44692	0.00391311	0.0419324	0	4063200	14015000	11131000	13372000	16252000	31214000	21834000	38969000	51929000	49845000	46581000	49081000	39781000	62486000	-5.34336	-2.66275	-3.08646	-2.50849	-3.97838	-2.35029	-2.53035	-2.33207	-1.89225	-1.96466	-1.78129	-1.6015	-1.79281	-1.50088	-3.20858	-1.83792	1.37066	0.00391311	0.0419324
167	sp|O14672|ADA10_HUMAN	sp|O14672|ADA10_HUMAN	6	sp|O14672|ADA10_HUMAN Disintegrin and metalloproteinase domain-containing protein 10 OS=Homo sapiens OX=9606 GN=ADAM10 PE=1 SV=1	-2.37289	-1.00587	sp|O14672|ADA10_HUMAN	1.36702	0.753597	1.98044	-1.68938	4.77834	0.000291887	0.00867902	0	31450000	15682000	15305000	5624600	64857000	63484000	31194000	108510000	110050000	107550000	79989000	51707000	59831000	99565000	-2.39036	-2.50239	-2.63745	-3.76286	-1.96811	-1.32834	-2.02073	-0.846382	-0.800952	-0.828935	-1.00238	-1.52572	-1.20694	-0.829815	-2.37289	-1.00587	1.36702	0.000291887	0.00867902
2695	sp|Q86SE8|NPM2_HUMAN	sp|Q86SE8|NPM2_HUMAN	2	sp|Q86SE8|NPM2_HUMAN Nucleoplasmin-2 OS=Homo sapiens OX=9606 GN=NPM2 PE=1 SV=1	-3.75643	-2.39425	sp|Q86SE8|NPM2_HUMAN	1.36218	0.52409	2.20027	-3.02295	3.51017	0.00382096	0.0413069	1	19747000	2682900	4258400	4521400	NA	35634000	9135900	43940000	32229000	33762000	35071000	35666000	15376000	42288000	-3.06193	-5.02172	-4.44127	-4.0791	NA	-2.15965	-3.77491	-2.15789	-2.58536	-2.54	-2.19016	-2.06569	-3.15736	-2.0633	-3.75643	-2.39425	1.36218	0.00382096	0.0413069
2325	sp|Q3KQV9|UAP1L_HUMAN	sp|Q3KQV9|UAP1L_HUMAN	14	sp|Q3KQV9|UAP1L_HUMAN UDP-N-acetylhexosamine pyrophosphorylase-like protein 1 OS=Homo sapiens OX=9606 GN=UAP1L1 PE=1 SV=2	0.374344	1.73439	sp|Q3KQV9|UAP1L_HUMAN	1.36005	0.971832	1.74826	1.05437	7.51177	2.77615e-06	0.000313574	0	346330000	143620000	136640000	84172000	205060000	253870000	120940000	628350000	629870000	565560000	573820000	442060000	502720000	619730000	1.0714	0.657683	0.449341	0.156204	-0.296061	0.666897	-0.0850571	1.70152	1.73395	1.62236	1.83619	1.59416	1.8485	1.80404	0.374344	1.73439	1.36005	2.77615e-06	0.000313574
4119	sp|Q9NYP9|MS18A_HUMAN	sp|Q9NYP9|MS18A_HUMAN	4	sp|Q9NYP9|MS18A_HUMAN Protein Mis18-alpha OS=Homo sapiens OX=9606 GN=MIS18A PE=1 SV=1	-3.07315	-1.72144	sp|Q9NYP9|MS18A_HUMAN	1.35172	0.648125	2.05531	-2.3973	4.11932	0.00103582	0.0190088	0	16193000	5434000	27448000	3746900	41979000	27779000	17262000	64345000	67592000	56852000	40645000	34472000	46689000	62088000	-3.34825	-4.01466	-1.81383	-4.35125	-2.59999	-2.51812	-2.86598	-1.60452	-1.50922	-1.77041	-1.97767	-2.1152	-1.56296	-1.51009	-3.07315	-1.72144	1.35172	0.00103582	0.0190088
772	sp|P10321|1C07_HUMAN	sp|P10321|1C07_HUMAN	15	sp|P10321|1C07_HUMAN HLA class I histocompatibility antigen, Cw-7 alpha chain OS=Homo sapiens OX=9606 GN=HLA-C PE=1 SV=3	-0.408732	0.92685	sp|P10321|1C07_HUMAN	1.33558	0.781044	1.89012	0.259059	5.16416	0.000142328	0.0055261	0	164230000	78097000	72778000	60029000	74084000	147670000	129810000	359150000	402050000	295440000	326970000	348030000	168800000	436320000	-0.00526228	-0.211605	-0.438885	-0.333419	-1.7749	-0.1131	0.016046	0.89003	1.08164	0.663397	1.02594	1.24645	0.281931	1.29857	-0.408732	0.92685	1.33558	0.000142328	0.0055261
4584	sp|Q9Y5V3|MAGD1_HUMAN	sp|Q9Y5V3|MAGD1_HUMAN	4	sp|Q9Y5V3|MAGD1_HUMAN Melanoma-associated antigen D1 OS=Homo sapiens OX=9606 GN=MAGED1 PE=1 SV=3	-3.46312	-2.15039	sp|Q9Y5V3|MAGD1_HUMAN	1.31274	0.652859	1.97262	-2.80675	4.26554	0.00077907	0.0163033	0	18044000	4142800	12279000	3204600	27409000	16248000	20608000	29809000	30438000	48452000	33513000	33559000	42074000	61035000	-3.19207	-4.40178	-2.94806	-4.5777	-3.2192	-3.29015	-2.6129	-2.72081	-2.66843	-2.00652	-2.25562	-2.15422	-1.71237	-1.53473	-3.46312	-2.15039	1.31274	0.00077907	0.0163033
2340	sp|Q4G148|GXLT1_HUMAN	sp|Q4G148|GXLT1_HUMAN	3	sp|Q4G148|GXLT1_HUMAN Glucoside xylosyltransferase 1 OS=Homo sapiens OX=9606 GN=GXYLT1 PE=1 SV=2	-3.67803	-2.36783	sp|Q4G148|GXLT1_HUMAN	1.3102	0.765277	1.85512	-3.02293	5.15541	0.000144635	0.00556965	0	19853000	6559600	5914900	5913000	8629300	14143000	16977000	32575000	29303000	37684000	30422000	31736000	28302000	45136000	-3.05421	-3.74604	-3.97796	-3.69043	-4.89792	-3.48989	-2.88976	-2.59208	-2.72365	-2.3777	-2.39502	-2.23543	-2.28153	-1.96941	-3.67803	-2.36783	1.3102	0.000144635	0.00556965
1404	sp|P50895|BCAM_HUMAN	sp|P50895|BCAM_HUMAN	8	sp|P50895|BCAM_HUMAN Basal cell adhesion molecule OS=Homo sapiens OX=9606 GN=BCAM PE=1 SV=2	-1.64656	-0.341823	sp|P50895|BCAM_HUMAN	1.30473	0.655238	1.95423	-0.994191	4.30731	0.000718461	0.0157646	0	88861000	22905000	36904000	13527000	79642000	31830000	73712000	208280000	195530000	182740000	58112000	123470000	109460000	132540000	-0.891548	-1.96182	-1.39642	-2.4918	-1.66982	-2.32216	-0.792333	0.099573	0.0342114	-0.0460654	-1.46267	-0.260224	-0.339857	-0.417735	-1.64656	-0.341823	1.30473	0.000718461	0.0157646
1537	sp|P56537|IF6_HUMAN	sp|P56537|IF6_HUMAN	9	sp|P56537|IF6_HUMAN Eukaryotic translation initiation factor 6 OS=Homo sapiens OX=9606 GN=EIF6 PE=1 SV=1	4.03526	5.33147	sp|P56537|IF6_HUMAN	1.29621	0.869949	1.72247	4.68337	6.52018	1.33607e-05	0.00112087	0	1617100000	1906300000	1875600000	1621400000	5917700000	2533200000	1441100000	7769600000	8288100000	8572700000	6846500000	5872200000	4851200000	5657800000	3.29507	4.34726	4.14267	4.44096	4.58797	3.97841	3.4545	5.35001	5.47846	5.63711	5.40765	5.35476	5.10268	4.98965	4.03526	5.33147	1.29621	1.33607e-05	0.00112087
3539	sp|Q9BRP1|PDD2L_HUMAN	sp|Q9BRP1|PDD2L_HUMAN	4	sp|Q9BRP1|PDD2L_HUMAN Programmed cell death protein 2-like OS=Homo sapiens OX=9606 GN=PDCD2L PE=1 SV=1	-2.61155	-1.31905	sp|Q9BRP1|PDD2L_HUMAN	1.2925	0.591062	1.99395	-1.9653	3.95094	0.00144115	0.0234275	0	61332000	4576200	10833000	12086000	42979000	43316000	24421000	78859000	81271000	69183000	62884000	69472000	54398000	66414000	-1.42657	-4.25981	-3.12473	-2.65495	-2.56579	-1.87862	-2.37039	-1.30944	-1.24143	-1.48051	-1.34898	-1.09633	-1.3436	-1.41306	-2.61155	-1.31905	1.2925	0.00144115	0.0234275
3461	sp|Q99519|NEUR1_HUMAN	sp|Q99519|NEUR1_HUMAN	6	sp|Q99519|NEUR1_HUMAN Sialidase-1 OS=Homo sapiens OX=9606 GN=NEU1 PE=1 SV=1	-2.21484	-0.923189	sp|Q99519|NEUR1_HUMAN	1.29165	0.74426	1.83904	-1.56901	5.05951	0.00017262	0.00632015	0	26362000	13853000	29252000	21307000	106380000	29983000	16115000	118510000	119170000	132180000	78762000	52720000	59384000	102050000	-2.64501	-2.67934	-1.72408	-1.8337	-1.24934	-2.40821	-2.9642	-0.71849	-0.685268	-0.524404	-1.02464	-1.49751	-1.21771	-0.794304	-2.21484	-0.923189	1.29165	0.00017262	0.00632015
1482	sp|P53634|CATC_HUMAN	sp|P53634|CATC_HUMAN	8	sp|P53634|CATC_HUMAN Dipeptidyl peptidase 1 OS=Homo sapiens OX=9606 GN=CTSC PE=1 SV=2	-1.32378	-0.0421601	sp|P53634|CATC_HUMAN	1.28162	0.55078	2.01246	-0.682969	3.76009	0.00210057	0.0297031	0	102280000	14394000	16727000	31606000	237110000	91814000	51805000	169840000	167860000	225750000	144060000	165590000	130150000	165520000	-0.688602	-2.62467	-2.51217	-1.26257	-0.08512	-0.797186	-1.29612	-0.196421	-0.187495	0.266079	-0.154822	0.166524	-0.0913338	-0.097652	-1.32378	-0.0421601	1.28162	0.00210057	0.0297031
4589	sp|Q9Y5Y0|FLVC1_HUMAN	sp|Q9Y5Y0|FLVC1_HUMAN	3	sp|Q9Y5Y0|FLVC1_HUMAN Feline leukemia virus subgroup C receptor-related protein 1 OS=Homo sapiens OX=9606 GN=FLVCR1 PE=1 SV=1	-2.83066	-1.56672	sp|Q9Y5Y0|FLVC1_HUMAN	1.26394	0.633333	1.89455	-2.19869	4.29761	0.00073209	0.0158496	0	15698000	10776000	16817000	7901000	89394000	15906000	18259000	81014000	45815000	95949000	49984000	40964000	32096000	89712000	-3.39305	-3.03774	-2.50461	-3.27062	-1.50203	-3.32078	-2.78577	-1.27032	-2.07426	-0.997497	-1.67972	-1.86433	-2.10095	-0.97992	-2.83066	-1.56672	1.26394	0.00073209	0.0158496
1541	sp|P56945|BCAR1_HUMAN	sp|P56945|BCAR1_HUMAN	4	sp|P56945|BCAR1_HUMAN Breast cancer anti-estrogen resistance protein 1 OS=Homo sapiens OX=9606 GN=BCAR1 PE=1 SV=2	-4.14874	-2.89583	sp|P56945|BCAR1_HUMAN	1.25291	0.549357	1.95646	-3.41787	3.87859	0.00217953	0.0300071	2	8081100	NA	5730200	NA	15301000	8192000	7653400	35263000	35041000	21610000	31229000	7266700	15730000	36627000	-4.35122	NA	-4.0227	NA	-4.06597	-4.27596	-4.02784	-2.47705	-2.46381	-3.19892	-2.3573	-4.37871	-3.12469	-2.27032	-4.14874	-2.89583	1.25291	0.00217953	0.0300071
4243	sp|Q9UGJ0|AAKG2_HUMAN	sp|Q9UGJ0|AAKG2_HUMAN	8	sp|Q9UGJ0|AAKG2_HUMAN 5-AMP-activated protein kinase subunit gamma-2 OS=Homo sapiens OX=9606 GN=PRKAG2 PE=1 SV=1	-1.37741	-0.129405	sp|Q9UGJ0|AAKG2_HUMAN	1.24801	0.474252	2.02176	-0.753408	3.45839	0.00382471	0.0413069	0	122890000	30812000	45628000	10312000	85206000	99027000	46928000	218130000	225040000	366890000	122660000	78735000	97164000	126720000	-0.423702	-1.53868	-1.09721	-2.88488	-1.57173	-0.688318	-1.43736	0.16661	0.238454	0.983268	-0.386487	-0.914354	-0.510908	-0.482418	-1.37741	-0.129405	1.24801	0.00382471	0.0413069
2946	sp|Q8NDA8|MROH1_HUMAN	sp|Q8NDA8|MROH1_HUMAN	5	sp|Q8NDA8|MROH1_HUMAN Maestro heat-like repeat-containing protein family member 1 OS=Homo sapiens OX=9606 GN=MROH1 PE=2 SV=3	-3.24484	-2.00322	sp|Q8NDA8|MROH1_HUMAN	1.24162	0.584248	1.899	-2.62403	4.04983	0.00118676	0.0207263	0	21102000	16671000	3416500	12329000	20863000	16546000	14912000	60975000	38861000	46125000	39754000	28094000	30227000	69969000	-2.96616	-2.41512	-4.75187	-2.62612	-3.61559	-3.26399	-3.07502	-1.68257	-2.31346	-2.0792	-2.0096	-2.41266	-2.18708	-1.33795	-3.24484	-2.00322	1.24162	0.00118676	0.0207263
3332	sp|Q96IJ6|GMPPA_HUMAN	sp|Q96IJ6|GMPPA_HUMAN	10	sp|Q96IJ6|GMPPA_HUMAN Mannose-1-phosphate guanyltransferase alpha OS=Homo sapiens OX=9606 GN=GMPPA PE=1 SV=1	-1.07694	0.148173	sp|Q96IJ6|GMPPA_HUMAN	1.22511	0.556993	1.89323	-0.464382	3.93172	0.00149672	0.0238359	0	74797000	33980000	24396000	27974000	349270000	122970000	39574000	216540000	201970000	268880000	189150000	140090000	159450000	166940000	-1.14017	-1.39903	-1.98004	-1.43938	0.477481	-0.376591	-1.68083	0.155996	0.0812969	0.52428	0.237464	-0.0766136	0.200131	-0.0853469	-1.07694	0.148173	1.22511	0.00149672	0.0238359
3872	sp|Q9HAD4|WDR41_HUMAN	sp|Q9HAD4|WDR41_HUMAN	5	sp|Q9HAD4|WDR41_HUMAN WD repeat-containing protein 41 OS=Homo sapiens OX=9606 GN=WDR41 PE=1 SV=3	-2.13989	-0.914798	sp|Q9HAD4|WDR41_HUMAN	1.22509	0.879928	1.57025	-1.52734	7.61038	2.39131e-06	0.000295552	0	37370000	20132000	26704000	14670000	39096000	38458000	38728000	108480000	114750000	120230000	80052000	91860000	50859000	87209000	-2.14149	-2.14595	-1.85258	-2.37431	-2.70333	-2.04986	-1.7117	-0.846783	-0.740185	-0.664344	-1.00124	-0.690193	-1.44016	-1.02068	-2.13989	-0.914798	1.22509	2.39131e-06	0.000295552
1092	sp|P30466|1B18_HUMAN	sp|P30466|1B18_HUMAN	11	sp|P30466|1B18_HUMAN HLA class I histocompatibility antigen, B-18 alpha chain OS=Homo sapiens OX=9606 GN=HLA-B PE=1 SV=1	0.135332	1.34088	sp|P30466|1B18_HUMAN	1.20555	0.755429	1.65566	0.738105	5.74274	5.02884e-05	0.00291673	0	174440000	137470000	98876000	49280000	301280000	306360000	103760000	420430000	473590000	416740000	387260000	482500000	315310000	540320000	0.0817696	0.595235	-0.00677824	-0.61921	0.262787	0.93744	-0.303918	1.11858	1.31959	1.17141	1.26972	1.72143	1.17888	1.60652	0.135332	1.34088	1.20555	5.02884e-05	0.00291673
3521	sp|Q9BQ75|CMS1_HUMAN	sp|Q9BQ75|CMS1_HUMAN	5	sp|Q9BQ75|CMS1_HUMAN Protein CMSS1 OS=Homo sapiens OX=9606 GN=CMSS1 PE=1 SV=2	-1.09623	0.094696	sp|Q9BQ75|CMS1_HUMAN	1.19093	0.634214	1.74764	-0.500768	4.58685	0.000419718	0.0112036	0	63379000	19683000	37279000	50432000	258880000	89657000	49559000	217730000	197200000	188670000	195810000	172090000	136330000	173020000	-1.3792	-2.17814	-1.38217	-0.58574	0.0424721	-0.831409	-1.35944	0.163947	0.0465688	0.00109666	0.287314	0.222503	-0.0247405	-0.0338175	-1.09623	0.094696	1.19093	0.000419718	0.0112036
739	sp|P08962|CD63_HUMAN	sp|P08962|CD63_HUMAN	3	sp|P08962|CD63_HUMAN CD63 antigen OS=Homo sapiens OX=9606 GN=CD63 PE=1 SV=2	-0.323093	0.857458	sp|P08962|CD63_HUMAN	1.18055	0.891729	1.46937	0.267183	8.76426	4.55561e-07	9.33226e-05	0	178110000	65927000	62796000	60668000	199900000	162090000	81829000	346750000	275840000	338800000	301730000	264270000	301760000	328820000	0.111814	-0.453325	-0.646895	-0.318082	-0.333079	0.0210232	-0.643107	0.839056	0.534205	0.865637	0.910205	0.846164	1.11583	0.891112	-0.323093	0.857458	1.18055	4.55561e-07	9.33226e-05
2485	sp|Q69YQ0|CYTSA_HUMAN	sp|Q69YQ0|CYTSA_HUMAN	5	sp|Q69YQ0|CYTSA_HUMAN Cytospin-A OS=Homo sapiens OX=9606 GN=SPECC1L PE=1 SV=2	-3.32543	-2.14554	sp|Q69YQ0|CYTSA_HUMAN	1.17989	0.721925	1.63785	-2.63716	5.61127	0.00011258	0.00489725	2	16556000	NA	10107000	6939700	NA	10968000	18411000	36009000	48986000	44110000	44919000	24355000	26701000	57095000	-3.31626	NA	-3.22254	-3.45853	NA	-3.85587	-2.77393	-2.44668	-1.97702	-2.14517	-1.83363	-2.6203	-2.36513	-1.63085	-3.32543	-2.14554	1.17989	0.00011258	0.00489725
2171	sp|Q15149|PLEC_HUMAN	sp|Q15149|PLEC_HUMAN	297	sp|Q15149|PLEC_HUMAN Plectin OS=Homo sapiens OX=9606 GN=PLEC PE=1 SV=3	6.00291	7.17808	sp|Q15149|PLEC_HUMAN	1.17517	0.887185	1.46315	6.59049	8.74976	4.64706e-07	9.33226e-05	0	10848000000	6733900000	8245700000	3841700000	11326000000	10841000000	10620000000	26307000000	35480000000	22093000000	23142000000	19392000000	19428000000	25393000000	6.0416	6.14798	6.23058	5.69042	5.53089	6.07127	6.30762	7.11938	7.59137	7.03517	7.16215	7.09165	7.0944	7.15242	6.00291	7.17808	1.17517	4.64706e-07	9.33226e-05
526	sp|O95070|YIF1A_HUMAN	sp|O95070|YIF1A_HUMAN	2	sp|O95070|YIF1A_HUMAN Protein YIF1A OS=Homo sapiens OX=9606 GN=YIF1A PE=1 SV=2	-2.40404	-1.24662	sp|O95070|YIF1A_HUMAN	1.15742	0.528369	1.78647	-1.82533	3.94518	0.00145761	0.0236132	0	45898000	21112000	21886000	20330000	22396000	14379000	34141000	82747000	98572000	104930000	47595000	53069000	49591000	91864000	-1.84487	-2.07813	-2.13312	-1.90169	-3.5126	-3.46607	-1.89178	-1.23962	-0.960998	-0.865357	-1.75027	-1.48791	-1.4764	-0.945775	-2.40404	-1.24662	1.15742	0.00145761	0.0236132
1953	sp|Q13277|STX3_HUMAN	sp|Q13277|STX3_HUMAN	4	sp|Q13277|STX3_HUMAN Syntaxin-3 OS=Homo sapiens OX=9606 GN=STX3 PE=1 SV=3	-1.87223	-0.725058	sp|Q13277|STX3_HUMAN	1.14718	0.427477	1.86688	-1.29865	3.41774	0.0041472	0.0436851	0	127800000	23887000	9692500	15655000	73691000	33664000	53481000	131500000	131200000	141190000	73214000	93840000	83875000	86998000	-0.36717	-1.90192	-3.28158	-2.28018	-1.78263	-2.24152	-1.25064	-0.567597	-0.545529	-0.42702	-1.12987	-0.659187	-0.722029	-1.02417	-1.87223	-0.725058	1.14718	0.0041472	0.0436851
2960	sp|Q8NEM2|SHCBP_HUMAN	sp|Q8NEM2|SHCBP_HUMAN	6	sp|Q8NEM2|SHCBP_HUMAN SHC SH2 domain-binding protein 1 OS=Homo sapiens OX=9606 GN=SHCBP1 PE=1 SV=3	-2.29692	-1.17799	sp|Q8NEM2|SHCBP_HUMAN	1.11893	0.529309	1.70856	-1.73746	4.06902	0.00114296	0.020414	0	24062000	30582000	29772000	10372000	36918000	20609000	46771000	92141000	63512000	72434000	70702000	89324000	79587000	65115000	-2.77675	-1.54937	-1.69923	-2.87647	-2.7866	-2.94789	-1.44215	-1.08361	-1.59968	-1.41269	-1.18017	-0.730895	-0.797359	-1.44152	-2.29692	-1.17799	1.11893	0.00114296	0.020414
440	sp|O75487|GPC4_HUMAN	sp|O75487|GPC4_HUMAN	7	sp|O75487|GPC4_HUMAN Glypican-4 OS=Homo sapiens OX=9606 GN=GPC4 PE=1 SV=4	-1.97869	-0.861496	sp|O75487|GPC4_HUMAN	1.11719	0.506955	1.72743	-1.42009	3.92545	0.00151533	0.0238973	0	40781000	31276000	33745000	9507400	38132000	34718000	70492000	88555000	113560000	121480000	73106000	69941000	77846000	130760000	-2.01544	-1.51735	-1.5226	-3.00254	-2.7396	-2.19714	-0.856138	-1.1412	-0.755332	-0.649069	-1.132	-1.08655	-0.829109	-0.437211	-1.97869	-0.861496	1.11719	0.00151533	0.0238973
2653	sp|Q7Z2K6|ERMP1_HUMAN	sp|Q7Z2K6|ERMP1_HUMAN	3	sp|Q7Z2K6|ERMP1_HUMAN Endoplasmic reticulum metallopeptidase 1 OS=Homo sapiens OX=9606 GN=ERMP1 PE=1 SV=2	-2.36673	-1.25841	sp|Q7Z2K6|ERMP1_HUMAN	1.10832	0.689157	1.52749	-1.81257	5.66946	5.72264e-05	0.00312081	0	45546000	14681000	13642000	15451000	31312000	37497000	33857000	63882000	87855000	65617000	80070000	63915000	52233000	95715000	-1.85598	-2.5965	-2.79964	-2.29918	-3.02583	-2.08629	-1.90371	-1.615	-1.12824	-1.55866	-1.00092	-1.21754	-1.40189	-0.886621	-2.36673	-1.25841	1.10832	5.72264e-05	0.00312081
4268	sp|Q9UHR4|BI2L1_HUMAN	sp|Q9UHR4|BI2L1_HUMAN	12	sp|Q9UHR4|BI2L1_HUMAN Brain-specific angiogenesis inhibitor 1-associated protein 2-like protein 1 OS=Homo sapiens OX=9606 GN=BAIAP2L1 PE=1 SV=2	-0.583217	0.49165	sp|Q9UHR4|BI2L1_HUMAN	1.07487	0.860325	1.28941	-0.0457837	10.7424	3.70883e-08	1.78567e-05	0	106610000	66629000	70947000	50526000	154190000	111350000	77108000	209400000	290860000	252160000	219920000	239780000	197090000	274260000	-0.628771	-0.438212	-0.474813	-0.583043	-0.710205	-0.519481	-0.727993	0.107353	0.611245	0.429467	0.454593	0.704772	0.504354	0.629762	-0.583217	0.49165	1.07487	3.70883e-08	1.78567e-05
778	sp|P10619|PPGB_HUMAN	sp|P10619|PPGB_HUMAN	4	sp|P10619|PPGB_HUMAN Lysosomal protective protein OS=Homo sapiens OX=9606 GN=CTSA PE=1 SV=2	-2.59551	-1.52349	sp|P10619|PPGB_HUMAN	1.07202	0.534039	1.61	-2.0595	4.27264	0.000768406	0.0162578	0	22797000	21195000	13895000	7721800	79254000	32548000	13693000	79537000	62512000	74832000	68204000	53926000	28615000	66198000	-2.85468	-2.07253	-2.77372	-3.30385	-1.67691	-2.29005	-3.19685	-1.29702	-1.62274	-1.36459	-1.23198	-1.46462	-2.26575	-1.41776	-2.59551	-1.52349	1.07202	0.000768406	0.0162578
1910	sp|Q12959|DLG1_HUMAN	sp|Q12959|DLG1_HUMAN	10	sp|Q12959|DLG1_HUMAN Disks large homolog 1 OS=Homo sapiens OX=9606 GN=DLG1 PE=1 SV=2	-1.97561	-0.904654	sp|Q12959|DLG1_HUMAN	1.07095	0.43141	1.7105	-1.44013	3.59055	0.00294044	0.0350218	0	54138000	13052000	39249000	26425000	28848000	34317000	52830000	142030000	115020000	62579000	90351000	78472000	87305000	82497000	-1.60661	-2.76432	-1.30956	-1.52189	-3.14488	-2.21386	-1.26814	-0.455843	-0.73677	-1.62867	-0.826894	-0.919218	-0.664495	-1.10069	-1.97561	-0.904654	1.07095	0.00294044	0.0350218
1956	sp|Q13303|KCAB2_HUMAN	sp|Q13303|KCAB2_HUMAN	10	sp|Q13303|KCAB2_HUMAN Voltage-gated potassium channel subunit beta-2 OS=Homo sapiens OX=9606 GN=KCNAB2 PE=1 SV=2	0.30775	1.37664	sp|Q13303|KCAB2_HUMAN	1.06889	0.675636	1.46215	0.842196	5.82799	4.33082e-05	0.00257547	0	217710000	113970000	130440000	50203000	306450000	336200000	155580000	493300000	492740000	507270000	405590000	429230000	333900000	436240000	0.401515	0.327735	0.383865	-0.592332	0.287502	1.07124	0.274725	1.35047	1.37719	1.46173	1.33634	1.55134	1.26112	1.29831	0.30775	1.37664	1.06889	4.33082e-05	0.00257547
2617	sp|Q71UM5|RS27L_HUMAN	sp|Q71UM5|RS27L_HUMAN	6	sp|Q71UM5|RS27L_HUMAN 40S ribosomal protein S27-like OS=Homo sapiens OX=9606 GN=RPS27L PE=1 SV=3	1.44883	2.51755	sp|Q71UM5|RS27L_HUMAN	1.06872	0.648855	1.48858	1.98319	5.4578	8.34692e-05	0.00404266	0	573480000	127310000	241900000	282410000	839220000	506900000	314390000	1102100000	1162300000	1217100000	782690000	714550000	936590000	944120000	1.79915	0.485678	1.25471	1.90954	1.75082	1.66232	1.27962	2.51667	2.62413	2.75421	2.28337	2.29234	2.74168	2.41043	1.44883	2.51755	1.06872	8.34692e-05	0.00404266
1990	sp|Q13509|TBB3_HUMAN	sp|Q13509|TBB3_HUMAN	22	sp|Q13509|TBB3_HUMAN Tubulin beta-3 chain OS=Homo sapiens OX=9606 GN=TUBB3 PE=1 SV=2	0.0982154	1.16256	sp|Q13509|TBB3_HUMAN	1.06434	0.705111	1.42357	0.630385	6.35287	1.76461e-05	0.00135904	0	229530000	86286000	107930000	66075000	173940000	206890000	184660000	436450000	381480000	410920000	310380000	425380000	272510000	452320000	0.477806	-0.0693219	0.116763	-0.194423	-0.535138	0.372319	0.519502	1.17283	1.00533	1.15064	0.950923	1.53824	0.969473	1.35045	0.0982154	1.16256	1.06434	1.76461e-05	0.00135904
3264	sp|Q96EB6|SIR1_HUMAN	sp|Q96EB6|SIR1_HUMAN	2	sp|Q96EB6|SIR1_HUMAN NAD-dependent protein deacetylase sirtuin-1 OS=Homo sapiens OX=9606 GN=SIRT1 PE=1 SV=2	-4.0155	-2.9638	sp|Q96EB6|SIR1_HUMAN	1.05171	0.490175	1.61324	-3.4492	4.04486	0.00138094	0.0232533	1	5683200	11798000	5166000	NA	22690000	7926600	6153100	26284000	23426000	28689000	20692000	18497000	13737000	26729000	-4.85917	-2.90846	-4.16885	NA	-3.49366	-4.32337	-4.33952	-2.90339	-3.0489	-2.78046	-2.95025	-3.02031	-3.31916	-2.72412	-4.0155	-2.9638	1.05171	0.00138094	0.0232533
4600	sp|Q9Y639|NPTN_HUMAN	sp|Q9Y639|NPTN_HUMAN	6	sp|Q9Y639|NPTN_HUMAN Neuroplastin OS=Homo sapiens OX=9606 GN=NPTN PE=1 SV=2	-1.28034	-0.233229	sp|Q9Y639|NPTN_HUMAN	1.04711	0.592298	1.50193	-0.756786	4.93649	0.000216954	0.00738586	0	32246000	42408000	33814000	28570000	139570000	96930000	62737000	198550000	163260000	179510000	141410000	118850000	108860000	123670000	-2.35429	-1.08288	-1.51972	-1.40884	-0.854907	-0.719129	-1.02262	0.0301652	-0.227869	-0.0724021	-0.181569	-0.31567	-0.347748	-0.517513	-1.28034	-0.233229	1.04711	0.000216954	0.00738586
2390	sp|Q5JVS0|HABP4_HUMAN	sp|Q5JVS0|HABP4_HUMAN	3	sp|Q5JVS0|HABP4_HUMAN Intracellular hyaluronan-binding protein 4 OS=Homo sapiens OX=9606 GN=HABP4 PE=1 SV=1	-3.72427	-2.69822	sp|Q5JVS0|HABP4_HUMAN	1.02605	0.530701	1.5214	-3.21124	4.44137	0.000554625	0.0134311	0	10744000	4566500	8611400	5706800	35847000	7383100	11699000	24873000	36288000	35498000	22538000	20509000	16029000	37663000	-3.94022	-4.26284	-3.44834	-3.74185	-2.82936	-4.42562	-3.42166	-2.98344	-2.413	-2.46595	-2.82714	-2.87019	-3.09766	-2.23014	-3.72427	-2.69822	1.02605	0.000554625	0.0134311
4625	sp|Q9Y6M7|S4A7_HUMAN	sp|Q9Y6M7|S4A7_HUMAN	5	sp|Q9Y6M7|S4A7_HUMAN Sodium bicarbonate cotransporter 3 OS=Homo sapiens OX=9606 GN=SLC4A7 PE=1 SV=2	-1.85794	-0.843651	sp|Q9Y6M7|S4A7_HUMAN	1.01429	0.644728	1.38386	-1.3508	5.88482	3.92244e-05	0.00242468	0	48517000	24577000	16864000	20452000	106060000	48848000	31068000	104200000	105750000	83367000	105720000	76678000	105850000	88778000	-1.7648	-1.86129	-2.50067	-1.89302	-1.25372	-1.7056	-2.02651	-0.905182	-0.858865	-1.20508	-0.60059	-0.952843	-0.387998	-0.994996	-1.85794	-0.843651	1.01429	3.92244e-05	0.00242468
4545	sp|Q9Y4P1|ATG4B_HUMAN	sp|Q9Y4P1|ATG4B_HUMAN	7	sp|Q9Y4P1|ATG4B_HUMAN Cysteine protease ATG4B OS=Homo sapiens OX=9606 GN=ATG4B PE=1 SV=2	-1.1778	-0.171404	sp|Q9Y4P1|ATG4B_HUMAN	1.0064	0.488297	1.5245	-0.674604	4.165	0.000947438	0.0182421	0	90696000	38760000	34530000	17462000	77751000	121210000	93206000	181710000	165110000	138990000	152030000	158470000	111410000	159550000	-0.862053	-1.21123	-1.49018	-2.12195	-1.70472	-0.397343	-0.457148	-0.0984141	-0.211496	-0.450213	-0.0772496	0.102625	-0.31451	-0.150567	-1.1778	-0.171404	1.0064	0.000947438	0.0182421
771	sp|P10316|1A69_HUMAN;sp|P30453|1A34_HUMAN;sp|P01891|1A68_HUMAN;sp|P30457|1A66_HUMAN;sp|P30450|1A26_HUMAN;sp|P18462|1A25_HUMAN	sp|P10316|1A69_HUMAN	11	sp|P10316|1A69_HUMAN HLA class I histocompatibility antigen, A-69 alpha chain OS=Homo sapiens OX=9606 GN=HLA-A PE=1 SV=2;sp|P30453|1A34_HUMAN HLA class I histocompatibility antigen, A-34 alpha chain OS=Homo sapiens OX=9606 GN=HLA-A PE=1 SV=1;sp|P01891|1A68	-2.37496	-1.37871	sp|P10316|1A69_HUMAN	0.996249	0.670553	1.32195	-1.83852	6.606	1.67237e-05	0.00130946	1	27544000	19195000	20158000	15523000	NA	27087000	24632000	72402000	77804000	77811000	51703000	69112000	36129000	92236000	-2.58172	-2.21396	-2.24909	-2.29244	NA	-2.55443	-2.3581	-1.43337	-1.30477	-1.30694	-1.63101	-1.10388	-1.93104	-0.939953	-2.37496	-1.37871	0.996249	1.67237e-05	0.00130946
663	sp|P05067|A4_HUMAN	sp|P05067|A4_HUMAN	6	sp|P05067|A4_HUMAN Amyloid-beta precursor protein OS=Homo sapiens OX=9606 GN=APP PE=1 SV=3	-1.8893	-0.896792	sp|P05067|A4_HUMAN	0.992507	0.40209	1.58292	-1.39305	3.60442	0.00286053	0.0347255	0	38509000	21961000	25734000	12098000	124110000	46704000	37673000	97525000	121690000	59666000	110090000	55051000	67494000	188340000	-2.09816	-2.02188	-1.90475	-2.65351	-1.02543	-1.77021	-1.75115	-1.00123	-0.654863	-1.69906	-0.54224	-1.4346	-1.03394	0.0883942	-1.8893	-0.896792	0.992507	0.00286053	0.0347255
1860	sp|Q08378|GOGA3_HUMAN	sp|Q08378|GOGA3_HUMAN	29	sp|Q08378|GOGA3_HUMAN Golgin subfamily A member 3 OS=Homo sapiens OX=9606 GN=GOLGA3 PE=1 SV=2	0.657483	1.64626	sp|Q08378|GOGA3_HUMAN	0.988774	0.524606	1.45294	1.15187	4.56754	0.000435471	0.0115584	0	324840000	124020000	220600000	101610000	192110000	347120000	240180000	617440000	730280000	528660000	570040000	390940000	346290000	626860000	0.97896	0.448318	1.12475	0.428916	-0.390816	1.11725	0.895007	1.67611	1.94887	1.52272	1.82667	1.41549	1.31342	1.82052	0.657483	1.64626	0.988774	0.000435471	0.0115584
603	sp|O95926|SYF2_HUMAN	sp|O95926|SYF2_HUMAN	3	sp|O95926|SYF2_HUMAN Pre-mRNA-splicing factor SYF2 OS=Homo sapiens OX=9606 GN=SYF2 PE=1 SV=1	-2.66794	-1.6855	sp|O95926|SYF2_HUMAN	0.982447	0.415619	1.54928	-2.17672	3.71636	0.00229064	0.0305722	0	18566000	7716500	13206000	10988000	47703000	34814000	37320000	62552000	35939000	95514000	40379000	51906000	46265000	56797000	-3.15092	-3.51427	-2.84544	-2.79291	-2.41432	-2.19316	-1.7646	-1.64552	-2.42704	-1.00421	-1.98713	-1.52013	-1.57606	-1.63839	-2.66794	-1.6855	0.982447	0.00229064	0.0305722
397	sp|O75122|CLAP2_HUMAN	sp|O75122|CLAP2_HUMAN	20	sp|O75122|CLAP2_HUMAN CLIP-associating protein 2 OS=Homo sapiens OX=9606 GN=CLASP2 PE=1 SV=3	-0.75093	0.225867	sp|O75122|CLAP2_HUMAN	0.976798	0.417882	1.53571	-0.262531	3.7473	0.00215444	0.0299454	0	94496000	65055000	75358000	17521000	140540000	153470000	86003000	192770000	301370000	193300000	246710000	162340000	128880000	209470000	-0.802826	-0.472324	-0.389764	-2.11707	-0.844847	-0.0576422	-0.57204	-0.0126949	0.662823	0.0369004	0.620188	0.137704	-0.10541	0.241562	-0.75093	0.225867	0.976798	0.00215444	0.0299454
3904	sp|Q9HCN4|GPN1_HUMAN	sp|Q9HCN4|GPN1_HUMAN	5	sp|Q9HCN4|GPN1_HUMAN GPN-loop GTPase 1 OS=Homo sapiens OX=9606 GN=GPN1 PE=1 SV=1	-1.10559	-0.160548	sp|Q9HCN4|GPN1_HUMAN	0.945039	0.602899	1.28718	-0.633068	5.92252	3.67388e-05	0.00230132	0	108980000	28709000	57769000	41830000	84779000	67171000	61320000	147840000	161640000	177620000	157660000	142500000	123500000	159340000	-0.597044	-1.63955	-0.764546	-0.856616	-1.57903	-1.24707	-1.05526	-0.397679	-0.242359	-0.0880333	-0.0248657	-0.0518144	-0.16662	-0.152464	-1.10559	-0.160548	0.945039	3.67388e-05	0.00230132
4377	sp|Q9UNF1|MAGD2_HUMAN	sp|Q9UNF1|MAGD2_HUMAN	19	sp|Q9UNF1|MAGD2_HUMAN Melanoma-associated antigen D2 OS=Homo sapiens OX=9606 GN=MAGED2 PE=1 SV=2	0.334049	1.26859	sp|Q9UNF1|MAGD2_HUMAN	0.934539	0.511565	1.35751	0.801319	4.73745	0.000315311	0.00897777	0	190710000	150200000	130790000	98517000	150060000	240470000	223990000	392760000	431190000	473480000	377670000	377070000	363500000	448260000	0.210447	0.721603	0.387643	0.38414	-0.749642	0.588836	0.795318	1.01981	1.18331	1.35993	1.2336	1.36297	1.38304	1.33746	0.334049	1.26859	0.934539	0.000315311	0.00897777
640	sp|P04049|RAF1_HUMAN	sp|P04049|RAF1_HUMAN	7	sp|P04049|RAF1_HUMAN RAF proto-oncogene serine/threonine-protein kinase OS=Homo sapiens OX=9606 GN=RAF1 PE=1 SV=1	-1.61258	-0.678678	sp|P04049|RAF1_HUMAN	0.933906	0.422861	1.44495	-1.14563	3.91836	0.00153664	0.0241443	0	82174000	19438000	40585000	27430000	36048000	70159000	49825000	128480000	120550000	131460000	95225000	88826000	82713000	107740000	-1.00444	-2.19601	-1.26236	-1.46782	-2.82124	-1.18442	-1.35179	-0.601304	-0.668539	-0.53247	-0.751205	-0.739024	-0.742055	-0.716147	-1.61258	-0.678678	0.933906	0.00153664	0.0241443
509	sp|O94855|SC24D_HUMAN	sp|O94855|SC24D_HUMAN	17	sp|O94855|SC24D_HUMAN Protein transport protein Sec24D OS=Homo sapiens OX=9606 GN=SEC24D PE=1 SV=2	0.555198	1.48688	sp|O94855|SC24D_HUMAN	0.931687	0.647447	1.21593	1.02104	7.02823	5.87641e-06	0.000547247	0	186860000	120760000	170400000	108450000	370700000	271470000	207160000	599480000	656060000	526130000	424310000	285050000	402420000	530280000	0.181018	0.410309	0.760674	0.523278	0.563976	0.763388	0.68374	1.63329	1.79314	1.51564	1.40135	0.956215	1.52906	1.5795	0.555198	1.48688	0.931687	5.87641e-06	0.000547247
4084	sp|Q9NX62|IMPA3_HUMAN	sp|Q9NX62|IMPA3_HUMAN	4	sp|Q9NX62|IMPA3_HUMAN Inositol monophosphatase 3 OS=Homo sapiens OX=9606 GN=IMPAD1 PE=1 SV=1	-0.0480392	0.873423	sp|Q9NX62|IMPA3_HUMAN	0.921462	0.435695	1.40723	0.412692	4.06733	0.00114674	0.020414	0	170690000	91685000	100600000	83512000	98800000	189400000	188010000	409410000	355520000	315130000	330420000	234480000	240280000	324080000	0.0504105	0.017278	0.0175951	0.144802	-1.35671	0.245171	0.545184	1.08005	0.902923	0.75868	1.04106	0.672275	0.788788	0.870196	-0.0480392	0.873423	0.921462	0.00114674	0.020414
3152	sp|Q92828|COR2A_HUMAN	sp|Q92828|COR2A_HUMAN	3	sp|Q92828|COR2A_HUMAN Coronin-2A OS=Homo sapiens OX=9606 GN=CORO2A PE=1 SV=2	-3.76901	-2.84916	sp|Q92828|COR2A_HUMAN	0.919852	0.436352	1.40335	-3.27371	4.10871	0.00122481	0.0211551	1	12169000	6505900	7920300	NA	25255000	15148000	4456500	24700000	32374000	24713000	20826000	29740000	15491000	22795000	-3.7605	-3.75777	-3.5663	NA	-3.33809	-3.39107	-4.80033	-2.99356	-2.57883	-3.00077	-2.94095	-2.32987	-3.14666	-2.95345	-3.76901	-2.84916	0.919852	0.00122481	0.0211551
2719	sp|Q86UY6|NAA40_HUMAN	sp|Q86UY6|NAA40_HUMAN	3	sp|Q86UY6|NAA40_HUMAN N-alpha-acetyltransferase 40 OS=Homo sapiens OX=9606 GN=NAA40 PE=1 SV=1	-2.88346	-1.96492	sp|Q86UY6|NAA40_HUMAN	0.918541	0.380464	1.45662	-2.42419	3.66029	0.00256013	0.0329275	0	31389000	8863700	8526600	6593100	24434000	39391000	29967000	44361000	50526000	49271000	46150000	36425000	36907000	45233000	-2.39316	-3.3165	-3.46229	-3.53274	-3.38609	-2.01535	-2.07805	-2.14406	-1.93205	-1.98176	-1.79469	-2.03508	-1.90046	-1.96632	-2.88346	-1.96492	0.918541	0.00256013	0.0329275
2529	sp|Q6P1N9|TATD1_HUMAN	sp|Q6P1N9|TATD1_HUMAN	7	sp|Q6P1N9|TATD1_HUMAN Putative deoxyribonuclease TATDN1 OS=Homo sapiens OX=9606 GN=TATDN1 PE=1 SV=2	-1.17275	-0.257456	sp|Q6P1N9|TATD1_HUMAN	0.915297	0.650109	1.18049	-0.715105	7.40062	3.28954e-06	0.000343428	0	75170000	37113000	37384000	32868000	131300000	73067000	57407000	168500000	163750000	191130000	167000000	101590000	85378000	153240000	-1.13299	-1.27319	-1.3782	-1.20586	-0.94363	-1.12596	-1.14945	-0.207912	-0.223514	0.0202278	0.0580441	-0.543814	-0.696534	-0.208693	-1.17275	-0.257456	0.915297	3.28954e-06	0.000343428
3676	sp|Q9BZ67|FRMD8_HUMAN	sp|Q9BZ67|FRMD8_HUMAN	3	sp|Q9BZ67|FRMD8_HUMAN FERM domain-containing protein 8 OS=Homo sapiens OX=9606 GN=FRMD8 PE=1 SV=1	-1.20203	-0.29222	sp|Q9BZ67|FRMD8_HUMAN	0.909807	0.465907	1.35371	-0.747124	4.39465	0.000606847	0.0141745	0	102660000	38712000	43978000	19792000	70813000	76313000	88921000	143510000	151460000	154750000	105970000	131060000	121340000	175460000	-0.683251	-1.213	-1.14915	-1.94054	-1.84049	-1.06339	-0.524377	-0.440804	-0.336878	-0.29159	-0.597187	-0.173488	-0.191949	-0.0136453	-1.20203	-0.29222	0.909807	0.000606847	0.0141745
1793	sp|Q02241|KIF23_HUMAN	sp|Q02241|KIF23_HUMAN	13	sp|Q02241|KIF23_HUMAN Kinesin-like protein KIF23 OS=Homo sapiens OX=9606 GN=KIF23 PE=1 SV=3	-0.25901	0.650292	sp|Q02241|KIF23_HUMAN	0.909302	0.577437	1.24117	0.195641	5.87498	3.99011e-05	0.00243449	0	111300000	119680000	90937000	61687000	230420000	122580000	77687000	268840000	314200000	259840000	300150000	211000000	255630000	266020000	-0.566647	0.397491	-0.124797	-0.293956	-0.126692	-0.381164	-0.717307	0.469855	0.7234	0.473775	0.902641	0.518869	0.877682	0.58582	-0.25901	0.650292	0.909302	3.99011e-05	0.00243449
2915	sp|Q8NB90|AFG2H_HUMAN	sp|Q8NB90|AFG2H_HUMAN	20	sp|Q8NB90|AFG2H_HUMAN ATPase family protein 2 homolog OS=Homo sapiens OX=9606 GN=SPATA5 PE=1 SV=3	0.237819	1.1458	sp|Q8NB90|AFG2H_HUMAN	0.907977	0.590506	1.22545	0.691807	6.13241	2.56098e-05	0.00185615	0	216180000	111940000	134240000	68860000	221250000	221460000	169480000	452710000	543300000	373560000	368230000	229230000	319670000	416210000	0.391338	0.302091	0.424355	-0.134624	-0.185681	0.470286	0.396966	1.2259	1.51912	1.00988	1.19713	0.639352	1.1986	1.2306	0.237819	1.1458	0.907977	2.56098e-05	0.00185615
346	sp|O60343|TBCD4_HUMAN	sp|O60343|TBCD4_HUMAN	21	sp|O60343|TBCD4_HUMAN TBC1 domain family member 4 OS=Homo sapiens OX=9606 GN=TBC1D4 PE=1 SV=2	-0.223928	0.669544	sp|O60343|TBCD4_HUMAN	0.893472	0.585811	1.20113	0.222808	6.22686	2.18146e-05	0.00162674	0	177380000	63012000	82343000	57442000	215910000	126550000	134140000	396730000	322120000	337730000	230510000	160450000	232240000	277930000	0.105887	-0.517853	-0.264775	-0.397226	-0.221169	-0.335281	0.0629172	1.0344	0.759572	0.860966	0.522345	0.120678	0.739933	0.64891	-0.223928	0.669544	0.893472	2.18146e-05	0.00162674
3628	sp|Q9BW60|ELOV1_HUMAN	sp|Q9BW60|ELOV1_HUMAN	3	sp|Q9BW60|ELOV1_HUMAN Elongation of very long chain fatty acids protein 1 OS=Homo sapiens OX=9606 GN=ELOVL1 PE=1 SV=1	-2.05049	-1.16514	sp|Q9BW60|ELOV1_HUMAN	0.885354	0.380167	1.39054	-1.60782	3.75773	0.00211043	0.0297031	0	78987000	20114000	22498000	11542000	38042000	56593000	29675000	82913000	100010000	77176000	73802000	65557000	77201000	61653000	-1.06152	-2.14723	-2.09424	-2.72166	-2.74303	-1.49374	-2.09204	-1.23671	-0.939954	-1.31904	-1.11835	-1.18066	-0.841053	-1.52021	-2.05049	-1.16514	0.885354	0.00211043	0.0297031
2201	sp|Q15398|DLGP5_HUMAN	sp|Q15398|DLGP5_HUMAN	10	sp|Q15398|DLGP5_HUMAN Disks large-associated protein 5 OS=Homo sapiens OX=9606 GN=DLGAP5 PE=1 SV=2	-1.35471	-0.470892	sp|Q15398|DLGP5_HUMAN	0.88382	0.373111	1.39453	-0.912802	3.71066	0.00231669	0.0307004	0	48708000	52349000	58822000	15798000	76561000	88910000	49373000	153600000	123330000	177130000	133490000	111730000	92613000	89917000	-1.75913	-0.782388	-0.739076	-2.26701	-1.72713	-0.843453	-1.36481	-0.342229	-0.635411	-0.092113	-0.264599	-0.405488	-0.57977	-0.976633	-1.35471	-0.470892	0.88382	0.00231669	0.0307004
710	sp|P07858|CATB_HUMAN	sp|P07858|CATB_HUMAN	7	sp|P07858|CATB_HUMAN Cathepsin B OS=Homo sapiens OX=9606 GN=CTSB PE=1 SV=3	-0.661811	0.220234	sp|P07858|CATB_HUMAN	0.882045	0.336422	1.42767	-0.220788	3.46624	0.00376544	0.0410442	0	150380000	38621000	36077000	28750000	217560000	188740000	91353000	168150000	223660000	228860000	189720000	185700000	171010000	227610000	-0.132395	-1.21636	-1.42838	-1.39975	-0.210111	0.240146	-0.485833	-0.210929	0.229516	0.286285	0.241798	0.333168	0.300603	0.361197	-0.661811	0.220234	0.882045	0.00376544	0.0410442
4176	sp|Q9P265|DIP2B_HUMAN	sp|Q9P265|DIP2B_HUMAN	12	sp|Q9P265|DIP2B_HUMAN Disco-interacting protein 2 homolog B OS=Homo sapiens OX=9606 GN=DIP2B PE=1 SV=3	-1.85493	-0.983258	sp|Q9P265|DIP2B_HUMAN	0.871673	0.496016	1.24733	-1.41909	4.97534	0.000201802	0.00702272	0	46932000	35398000	27425000	24715000	43414000	39795000	35266000	72381000	118760000	83205000	74331000	78756000	73861000	114840000	-1.81272	-1.3407	-1.81501	-1.61879	-2.55116	-2.00067	-1.84547	-1.43379	-0.690276	-1.20796	-1.10806	-0.913966	-0.904541	-0.624218	-1.85493	-0.983258	0.871673	0.000201802	0.00702272
838	sp|P13987|CD59_HUMAN	sp|P13987|CD59_HUMAN	3	sp|P13987|CD59_HUMAN CD59 glycoprotein OS=Homo sapiens OX=9606 GN=CD59 PE=1 SV=1	-1.321	-0.451967	sp|P13987|CD59_HUMAN	0.86903	0.35315	1.38491	-0.886482	3.61199	0.00281779	0.0344197	0	73390000	28893000	30502000	29258000	155680000	62717000	49282000	102290000	128210000	236350000	104490000	83769000	71293000	235530000	-1.16757	-1.63044	-1.66507	-1.37438	-0.696236	-1.34584	-1.36744	-0.932021	-0.579026	0.333843	-0.617449	-0.824247	-0.955338	0.410468	-1.321	-0.451967	0.86903	0.00281779	0.0344197
2209	sp|Q15436|SC23A_HUMAN	sp|Q15436|SC23A_HUMAN	21	sp|Q15436|SC23A_HUMAN Protein transport protein Sec23A OS=Homo sapiens OX=9606 GN=SEC23A PE=1 SV=2	1.71741	2.57624	sp|Q15436|SC23A_HUMAN	0.858831	0.579471	1.13819	2.14683	6.59179	1.18749e-05	0.00101433	0	616680000	334970000	350970000	234970000	528140000	533540000	526080000	1150600000	1227500000	1154200000	828930000	823700000	890810000	1033300000	1.90395	1.86607	1.77949	1.64317	1.07813	1.73605	2.01502	2.57915	2.70343	2.67584	2.36606	2.49902	2.66974	2.54045	1.71741	2.57624	0.858831	1.18749e-05	0.00101433
2684	sp|Q7Z6K3|PTAR1_HUMAN	sp|Q7Z6K3|PTAR1_HUMAN	2	sp|Q7Z6K3|PTAR1_HUMAN Protein prenyltransferase alpha subunit repeat-containing protein 1 OS=Homo sapiens OX=9606 GN=PTAR1 PE=1 SV=2	-3.92117	-3.07582	sp|Q7Z6K3|PTAR1_HUMAN	0.845346	0.386669	1.30402	-3.4985	3.95174	0.0014389	0.0234275	0	23085000	6020100	5387000	3248900	13052000	12887000	7002200	25193000	21899000	24007000	16995000	18008000	14111000	25326000	-2.83656	-3.8685	-4.10978	-4.55781	-4.29689	-3.62377	-4.15486	-2.96489	-3.14684	-3.04358	-3.2338	-3.05927	-3.2806	-2.80179	-3.92117	-3.07582	0.845346	0.0014389	0.0234275
3069	sp|Q8WVB6|CTF18_HUMAN	sp|Q8WVB6|CTF18_HUMAN	12	sp|Q8WVB6|CTF18_HUMAN Chromosome transmission fidelity protein 18 homolog OS=Homo sapiens OX=9606 GN=CHTF18 PE=1 SV=1	-1.22733	-0.384044	sp|Q8WVB6|CTF18_HUMAN	0.843288	0.363069	1.32351	-0.805687	3.76528	0.00207909	0.0297031	0	88035000	55030000	41846000	29963000	48298000	88744000	56444000	112650000	165120000	119920000	136220000	110890000	119570000	159420000	-0.905024	-0.711121	-1.21922	-1.33989	-2.39631	-0.846143	-1.17362	-0.792061	-0.211408	-0.668157	-0.235435	-0.41646	-0.213042	-0.151741	-1.22733	-0.384044	0.843288	0.00207909	0.0297031
4407	sp|Q9UPU5|UBP24_HUMAN	sp|Q9UPU5|UBP24_HUMAN	18	sp|Q9UPU5|UBP24_HUMAN Ubiquitin carboxyl-terminal hydrolase 24 OS=Homo sapiens OX=9606 GN=USP24 PE=1 SV=3	-0.0412394	0.785757	sp|Q9UPU5|UBP24_HUMAN	0.826997	0.341687	1.31231	0.372259	3.65381	0.00259327	0.0329275	0	208290000	85451000	125010000	45283000	165890000	273380000	104420000	258290000	471220000	296920000	259620000	288890000	208450000	319860000	0.337687	-0.0831974	0.323911	-0.741729	-0.603967	0.773481	-0.294861	0.411776	1.3123	0.670776	0.693666	0.975671	0.584797	0.851316	-0.0412394	0.785757	0.826997	0.00259327	0.0329275
3522	sp|Q9BQ90|KLDC3_HUMAN	sp|Q9BQ90|KLDC3_HUMAN	2	sp|Q9BQ90|KLDC3_HUMAN Kelch domain-containing protein 3 OS=Homo sapiens OX=9606 GN=KLHDC3 PE=2 SV=1	-3.34448	-2.52169	sp|Q9BQ90|KLDC3_HUMAN	0.822781	0.304735	1.34083	-2.93309	3.40546	0.0042499	0.0443424	0	18605000	8234200	8406800	6719800	17104000	13270000	24451000	45424000	46295000	30013000	26762000	29301000	25762000	16471000	-3.14789	-3.42161	-3.48225	-3.50517	-3.90416	-3.58161	-2.36864	-2.10971	-2.05912	-2.71383	-2.57968	-2.3515	-2.41652	-3.42152	-3.34448	-2.52169	0.822781	0.0042499	0.0443424
1849	sp|Q07617|SPAG1_HUMAN	sp|Q07617|SPAG1_HUMAN	8	sp|Q07617|SPAG1_HUMAN Sperm-associated antigen 1 OS=Homo sapiens OX=9606 GN=SPAG1 PE=1 SV=3	-1.17282	-0.361829	sp|Q07617|SPAG1_HUMAN	0.81099	0.495128	1.12685	-0.767324	5.50528	7.6652e-05	0.00388495	0	86693000	35646000	45791000	32709000	82055000	82308000	60871000	146870000	177270000	170940000	124240000	97037000	76410000	172480000	-0.92719	-1.33074	-1.09219	-1.21288	-1.62646	-0.954521	-1.06575	-0.407229	-0.108242	-0.144645	-0.36805	-0.610479	-0.855837	-0.0383202	-1.17282	-0.361829	0.81099	7.6652e-05	0.00388495
1097	sp|P30533|AMRP_HUMAN	sp|P30533|AMRP_HUMAN	17	sp|P30533|AMRP_HUMAN Alpha-2-macroglobulin receptor-associated protein OS=Homo sapiens OX=9606 GN=LRPAP1 PE=1 SV=1	2.19431	3.00406	sp|P30533|AMRP_HUMAN	0.809752	0.589223	1.03028	2.59918	7.8731	1.61644e-06	0.000245713	0	722080000	382460000	430290000	369710000	1414400000	649820000	632360000	1494700000	1604800000	1706900000	1078000000	1178900000	1058800000	1462200000	2.13164	2.05525	2.0668	2.29969	2.50903	2.01987	2.27786	2.95873	3.09287	3.25368	2.74454	3.02029	2.91774	3.04056	2.19431	3.00406	0.809752	1.61644e-06	0.000245713
2762	sp|Q8IU85|KCC1D_HUMAN	sp|Q8IU85|KCC1D_HUMAN	2	sp|Q8IU85|KCC1D_HUMAN Calcium/calmodulin-dependent protein kinase type 1D OS=Homo sapiens OX=9606 GN=CAMK1D PE=1 SV=1	-3.6574	-2.84784	sp|Q8IU85|KCC1D_HUMAN	0.809556	0.294733	1.32438	-3.28375	3.39604	0.00475835	0.0480747	1	8326500	7767100	6734200	7875600	24235000	14278000	8703000	33223000	29034000	NA	14127000	27028000	11787000	36417000	-4.30805	-3.50494	-3.79505	-3.27529	-3.39797	-3.47621	-3.84425	-2.5635	-2.73705	NA	-3.50006	-2.4689	-3.53893	-2.2786	-3.6574	-2.84784	0.809556	0.00475835	0.0480747
3479	sp|Q99640|PMYT1_HUMAN	sp|Q99640|PMYT1_HUMAN	3	sp|Q99640|PMYT1_HUMAN Membrane-associated tyrosine- and threonine-specific cdc2-inhibitory kinase OS=Homo sapiens OX=9606 GN=PKMYT1 PE=1 SV=1	-2.71212	-1.90319	sp|Q99640|PMYT1_HUMAN	0.808925	0.295297	1.32255	-2.30766	3.37692	0.00449857	0.0460345	0	25282000	15684000	13347000	6551000	27510000	46822000	23516000	59525000	62687000	55336000	35553000	53988000	28211000	36986000	-2.70538	-2.50221	-2.83046	-3.54202	-3.21386	-1.76658	-2.42434	-1.71749	-1.61868	-1.81032	-2.17049	-1.46295	-2.28616	-2.25627	-2.71212	-1.90319	0.808925	0.00449857	0.0460345
3184	sp|Q969H8|MYDGF_HUMAN	sp|Q969H8|MYDGF_HUMAN	5	sp|Q969H8|MYDGF_HUMAN Myeloid-derived growth factor OS=Homo sapiens OX=9606 GN=MYDGF PE=1 SV=1	2.29854	3.10623	sp|Q969H8|MYDGF_HUMAN	0.807692	0.524006	1.09138	2.70239	6.10476	2.6847e-05	0.0018825	0	752410000	510640000	524420000	368740000	1002900000	789190000	728610000	1480900000	1691700000	2200000000	1132800000	1435300000	1177400000	1244100000	2.19101	2.46768	2.34575	2.29588	2.00963	2.29959	2.48025	2.94527	3.16949	3.62846	2.81597	3.30641	3.07015	2.80788	2.29854	3.10623	0.807692	2.6847e-05	0.0018825
1501	sp|P54760|EPHB4_HUMAN	sp|P54760|EPHB4_HUMAN	6	sp|P54760|EPHB4_HUMAN Ephrin type-B receptor 4 OS=Homo sapiens OX=9606 GN=EPHB4 PE=1 SV=2	-2.78996	-1.98693	sp|P54760|EPHB4_HUMAN	0.803029	0.292419	1.31364	-2.38844	3.37212	0.0045418	0.0461848	0	20916000	21660000	20643000	6329200	34325000	14728000	24295000	42707000	66168000	53386000	40501000	33802000	26966000	49779000	-2.97894	-2.04157	-2.21557	-3.59191	-2.89238	-3.43154	-2.37778	-2.19919	-1.54016	-1.8633	-1.98278	-2.14373	-2.35095	-1.82837	-2.78996	-1.98693	0.803029	0.0045418	0.0461848
2346	sp|Q52LJ0|FA98B_HUMAN	sp|Q52LJ0|FA98B_HUMAN	7	sp|Q52LJ0|FA98B_HUMAN Protein FAM98B OS=Homo sapiens OX=9606 GN=FAM98B PE=1 SV=2	-0.623915	0.172081	sp|Q52LJ0|FA98B_HUMAN	0.795996	0.29552	1.29647	-0.225917	3.41026	0.00420946	0.0442417	0	147020000	31263000	46959000	58055000	147350000	144690000	102070000	287160000	209690000	125140000	217450000	151220000	169070000	226070000	-0.165002	-1.51795	-1.05667	-0.381851	-0.776114	-0.142447	-0.327376	0.565494	0.135801	-0.605232	0.438322	0.0345389	0.284226	0.351418	-0.623915	0.172081	0.795996	0.00420946	0.0442417
4496	sp|Q9Y3A4|RRP7A_HUMAN	sp|Q9Y3A4|RRP7A_HUMAN	10	sp|Q9Y3A4|RRP7A_HUMAN Ribosomal RNA-processing protein 7 homolog A OS=Homo sapiens OX=9606 GN=RRP7A PE=1 SV=2	0.443137	1.23245	sp|Q9Y3A4|RRP7A_HUMAN	0.789313	0.282154	1.29647	0.837794	3.33707	0.00487025	0.0484755	0	329970000	69077000	154250000	80147000	309560000	399310000	143630000	446780000	564150000	539070000	339600000	264450000	262500000	485220000	1.00157	-0.386727	0.620272	0.0852304	0.302168	1.31888	0.160562	1.20677	1.57384	1.55152	1.08053	0.847154	0.915751	1.45159	0.443137	1.23245	0.789313	0.00487025	0.0484755
2007	sp|Q13610|PWP1_HUMAN	sp|Q13610|PWP1_HUMAN	9	sp|Q13610|PWP1_HUMAN Periodic tryptophan protein 1 homolog OS=Homo sapiens OX=9606 GN=PWP1 PE=1 SV=1	0.397862	1.18458	sp|Q13610|PWP1_HUMAN	0.786719	0.30278	1.27066	0.791222	3.48569	0.00362239	0.040327	0	246200000	113620000	183680000	93422000	540070000	205460000	75193000	471900000	491090000	472710000	342900000	272940000	285850000	421990000	0.578976	0.323347	0.866491	0.307225	1.11058	0.362335	-0.763917	1.28613	1.37231	1.35752	1.09446	0.893097	1.03808	1.25047	0.397862	1.18458	0.786719	0.00362239	0.040327
1246	sp|P42696|RBM34_HUMAN	sp|P42696|RBM34_HUMAN	13	sp|P42696|RBM34_HUMAN RNA-binding protein 34 OS=Homo sapiens OX=9606 GN=RBM34 PE=1 SV=2	-0.18861	0.594002	sp|P42696|RBM34_HUMAN	0.782612	0.398528	1.1667	0.202696	4.36899	0.000637657	0.014526	0	142240000	91221000	108770000	75386000	119970000	190790000	95473000	265800000	314610000	336790000	233680000	189070000	226150000	254030000	-0.212697	0.0100384	0.127695	-0.00347331	-1.07471	0.255697	-0.42282	0.453357	0.725295	0.85685	0.542021	0.359316	0.701788	0.519387	-0.18861	0.594002	0.782612	0.000637657	0.014526
2814	sp|Q8IY37|DHX37_HUMAN	sp|Q8IY37|DHX37_HUMAN	12	sp|Q8IY37|DHX37_HUMAN Probable ATP-dependent RNA helicase DHX37 OS=Homo sapiens OX=9606 GN=DHX37 PE=1 SV=1	-1.10765	-0.335469	sp|Q8IY37|DHX37_HUMAN	0.772182	0.310966	1.2334	-0.72156	3.58985	0.00294457	0.0350218	0	84546000	51106000	41252000	18055000	90973000	126550000	70862000	140350000	175970000	154340000	138230000	96487000	97753000	162360000	-0.963377	-0.816677	-1.23938	-2.07358	-1.4766	-0.335281	-0.848659	-0.473106	-0.118937	-0.295508	-0.214334	-0.618744	-0.502233	-0.125418	-1.10765	-0.335469	0.772182	0.00294457	0.0350218
1988	sp|Q13501|SQSTM_HUMAN	sp|Q13501|SQSTM_HUMAN	14	sp|Q13501|SQSTM_HUMAN Sequestosome-1 OS=Homo sapiens OX=9606 GN=SQSTM1 PE=1 SV=1	1.4351	2.19886	sp|Q13501|SQSTM_HUMAN	0.763762	0.278581	1.24894	1.81698	3.37532	0.00451289	0.0460345	0	359350000	358380000	325790000	206330000	288210000	603490000	427140000	942240000	848330000	736330000	728030000	733880000	643850000	821570000	1.12465	1.96246	1.67452	1.4549	0.198366	1.9134	1.71741	2.28932	2.16659	2.01204	2.17908	2.33115	2.20369	2.21016	1.4351	2.19886	0.763762	0.00451289	0.0460345
556	sp|O95376|ARI2_HUMAN	sp|O95376|ARI2_HUMAN	9	sp|O95376|ARI2_HUMAN E3 ubiquitin-protein ligase ARIH2 OS=Homo sapiens OX=9606 GN=ARIH2 PE=1 SV=1	-1.2612	-0.498508	sp|O95376|ARI2_HUMAN	0.762697	0.369322	1.15607	-0.879856	4.15725	0.000961879	0.0184445	0	69300000	40017000	35707000	28265000	193870000	42000000	53711000	129320000	138320000	166780000	124690000	98694000	88319000	112700000	-1.25032	-1.16569	-1.44292	-1.42439	-0.37757	-1.92303	-1.24451	-0.59185	-0.468741	-0.181029	-0.362841	-0.585862	-0.647918	-0.651314	-1.2612	-0.498508	0.762697	0.000961879	0.0184445
3342	sp|Q96J02|ITCH_HUMAN	sp|Q96J02|ITCH_HUMAN	9	sp|Q96J02|ITCH_HUMAN E3 ubiquitin-protein ligase Itchy homolog OS=Homo sapiens OX=9606 GN=ITCH PE=1 SV=2	-1.12796	-0.370239	sp|Q96J02|ITCH_HUMAN	0.757722	0.301117	1.21433	-0.7491	3.5582	0.0031358	0.036535	0	57740000	59166000	55630000	37096000	56173000	98211000	61594000	152390000	142120000	187640000	108050000	99408000	115650000	134540000	-1.51366	-0.607716	-0.817746	-1.03058	-2.17691	-0.700229	-1.04889	-0.353703	-0.429362	-0.00698773	-0.569185	-0.575382	-0.260892	-0.396161	-1.12796	-0.370239	0.757722	0.0031358	0.036535
3247	sp|Q96CV9|OPTN_HUMAN	sp|Q96CV9|OPTN_HUMAN	7	sp|Q96CV9|OPTN_HUMAN Optineurin OS=Homo sapiens OX=9606 GN=OPTN PE=1 SV=3	-1.02333	-0.272017	sp|Q96CV9|OPTN_HUMAN	0.751317	0.266961	1.23567	-0.647676	3.32597	0.00497914	0.0493502	0	139230000	40887000	40667000	21097000	86408000	97560000	95928000	153040000	197190000	151270000	116680000	129030000	98200000	162120000	-0.243561	-1.135	-1.25952	-1.84805	-1.55138	-0.709803	-0.416028	-0.347528	0.0464951	-0.32518	-0.458489	-0.196184	-0.495684	-0.127549	-1.02333	-0.272017	0.751317	0.00497914	0.0493502
1535	sp|P56270|MAZ_HUMAN	sp|P56270|MAZ_HUMAN	3	sp|P56270|MAZ_HUMAN Myc-associated zinc finger protein OS=Homo sapiens OX=9606 GN=MAZ PE=1 SV=1	-3.61234	-2.86112	sp|P56270|MAZ_HUMAN	0.751223	0.45692	1.04553	-3.17413	5.55935	0.000122312	0.00518876	2	NA	8204600	7252900	NA	22334000	13694000	8419500	27375000	26211000	35784000	18365000	22280000	15598000	24749000	NA	-3.42675	-3.69042	NA	-3.51663	-3.53633	-3.89156	-2.84439	-2.88568	-2.4541	-3.12211	-2.74977	-3.13678	-2.83498	-3.61234	-2.86112	0.751223	0.000122312	0.00518876
4576	sp|Q9Y5P6|GMPPB_HUMAN	sp|Q9Y5P6|GMPPB_HUMAN	7	sp|Q9Y5P6|GMPPB_HUMAN Mannose-1-phosphate guanyltransferase beta OS=Homo sapiens OX=9606 GN=GMPPB PE=1 SV=2	-0.583923	0.163264	sp|Q9Y5P6|GMPPB_HUMAN	0.747187	0.29681	1.19756	-0.21033	3.55724	0.00314176	0.036535	0	151210000	35383000	85295000	30070000	222130000	122900000	89535000	216050000	203030000	275810000	197850000	157420000	147550000	160210000	-0.124452	-1.3413	-0.215111	-1.33473	-0.179915	-0.377411	-0.514547	0.152709	0.0889029	0.561861	0.302245	0.0929594	0.0887903	-0.144621	-0.583923	0.163264	0.747187	0.00314176	0.036535
635	sp|P02545|LMNA_HUMAN	sp|P02545|LMNA_HUMAN	59	sp|P02545|LMNA_HUMAN Prelamin-A/C OS=Homo sapiens OX=9606 GN=LMNA PE=1 SV=1	5.59172	6.32729	sp|P02545|LMNA_HUMAN	0.735577	0.406849	1.0643	5.9595	4.79791	0.000281319	0.00867902	0	10131000000	4556100000	5928500000	3843200000	7287000000	6869800000	7694500000	14256000000	19671000000	12848000000	11501000000	11527000000	11536000000	13620000000	5.94293	5.59051	5.76539	5.69098	4.89031	5.41456	5.84732	6.23056	6.73434	6.23463	6.15487	6.33537	6.34616	6.2551	5.59172	6.32729	0.735577	0.000281319	0.00867902
4339	sp|Q9UL25|RAB21_HUMAN	sp|Q9UL25|RAB21_HUMAN	11	sp|Q9UL25|RAB21_HUMAN Ras-related protein Rab-21 OS=Homo sapiens OX=9606 GN=RAB21 PE=1 SV=3	1.06131	1.79655	sp|Q9UL25|RAB21_HUMAN	0.735247	0.357534	1.11296	1.42893	4.1738	0.000931312	0.0180798	0	377830000	169400000	278670000	113620000	716040000	351520000	200670000	590270000	597380000	983140000	484370000	523640000	452760000	592120000	1.19702	0.893251	1.45424	0.590732	1.52025	1.13538	0.638272	1.61083	1.657	2.43895	1.59206	1.8404	1.69825	1.73839	1.06131	1.79655	0.735247	0.000931312	0.0180798
4067	sp|Q9NWT1|PK1IP_HUMAN	sp|Q9NWT1|PK1IP_HUMAN	9	sp|Q9NWT1|PK1IP_HUMAN p21-activated protein kinase-interacting protein 1 OS=Homo sapiens OX=9606 GN=PAK1IP1 PE=1 SV=2	0.611123	1.34219	sp|Q9NWT1|PK1IP_HUMAN	0.731068	0.403183	1.05895	0.976657	4.78076	0.000290555	0.00867902	0	330990000	110670000	159420000	109650000	257220000	289000000	239920000	407540000	478480000	407340000	472020000	392360000	416030000	435930000	1.00602	0.28581	0.666757	0.539217	0.033128	0.853467	0.893459	1.0734	1.33452	1.13772	1.55485	1.42076	1.5768	1.29728	0.611123	1.34219	0.731068	0.000290555	0.00867902
3313	sp|Q96GX9|MTNB_HUMAN	sp|Q96GX9|MTNB_HUMAN	5	sp|Q96GX9|MTNB_HUMAN Methylthioribulose-1-phosphate dehydratase OS=Homo sapiens OX=9606 GN=APIP PE=1 SV=1	-1.20912	-0.483733	sp|Q96GX9|MTNB_HUMAN	0.725387	0.463675	0.987099	-0.846427	5.94301	3.5457e-05	0.00225104	0	53439000	40382000	44069000	31326000	142070000	76266000	49171000	128740000	148040000	135200000	128390000	86802000	95732000	143710000	-1.62536	-1.15273	-1.14623	-1.27545	-0.829119	-1.06427	-1.37067	-0.598371	-0.370063	-0.491042	-0.320716	-0.772536	-0.532222	-0.301182	-1.20912	-0.483733	0.725387	3.5457e-05	0.00225104
1978	sp|Q13439|GOGA4_HUMAN	sp|Q13439|GOGA4_HUMAN	19	sp|Q13439|GOGA4_HUMAN Golgin subfamily A member 4 OS=Homo sapiens OX=9606 GN=GOLGA4 PE=1 SV=1	-1.27915	-0.560869	sp|Q13439|GOGA4_HUMAN	0.718282	0.307335	1.12923	-0.92001	3.74774	0.00215257	0.0299454	0	86151000	42393000	44812000	35164000	51810000	74217000	51452000	170990000	101830000	109660000	112480000	104090000	103890000	117530000	-0.93624	-1.08339	-1.12266	-1.10805	-2.29435	-1.10348	-1.30589	-0.18663	-0.91375	-0.800243	-0.511301	-0.508468	-0.414828	-0.590866	-1.27915	-0.560869	0.718282	0.00215257	0.0299454
1284	sp|P46736|BRCC3_HUMAN	sp|P46736|BRCC3_HUMAN	8	sp|P46736|BRCC3_HUMAN Lys-63-specific deubiquitinase BRCC36 OS=Homo sapiens OX=9606 GN=BRCC3 PE=1 SV=2	-1.03572	-0.318411	sp|P46736|BRCC3_HUMAN	0.717306	0.268204	1.16641	-0.677063	3.42468	0.00409029	0.043345	0	100160000	54042000	39831000	23769000	131530000	87389000	62821000	96778000	100910000	175990000	182210000	138900000	130450000	154760000	-0.718827	-0.736972	-1.2888	-1.67532	-0.941088	-0.868292	-1.02071	-1.01238	-0.926937	-0.101648	0.183614	-0.0890167	-0.0880288	-0.194475	-1.03572	-0.318411	0.717306	0.00409029	0.043345
3452	sp|Q99442|SEC62_HUMAN	sp|Q99442|SEC62_HUMAN	6	sp|Q99442|SEC62_HUMAN Translocation protein SEC62 OS=Homo sapiens OX=9606 GN=SEC62 PE=1 SV=1	0.0460686	0.761068	sp|Q99442|SEC62_HUMAN	0.714999	0.308224	1.12177	0.403568	3.76887	0.00206438	0.0296588	0	188740000	85880000	96090000	89075000	149820000	206590000	169090000	212240000	281160000	319870000	341490000	285720000	248680000	347720000	0.195463	-0.0760517	-0.0470786	0.238209	-0.751967	0.37023	0.393675	0.126897	0.561962	0.780728	1.08853	0.959629	0.838114	0.971615	0.0460686	0.761068	0.714999	0.00206438	0.0296588
3370	sp|Q96M27|PRRC1_HUMAN	sp|Q96M27|PRRC1_HUMAN	7	sp|Q96M27|PRRC1_HUMAN Protein PRRC1 OS=Homo sapiens OX=9606 GN=PRRC1 PE=1 SV=1	0.224895	0.938592	sp|Q96M27|PRRC1_HUMAN	0.713697	0.519277	0.908118	0.581743	7.87105	1.62135e-06	0.000245713	0	197910000	106490000	117700000	81361000	284250000	198800000	151880000	409290000	366740000	422100000	273030000	291090000	219450000	340320000	0.263922	0.230872	0.23895	0.107006	0.17827	0.314899	0.240343	1.07962	0.948071	1.19029	0.766217	0.986701	0.658617	0.940629	0.224895	0.938592	0.713697	1.62135e-06	0.000245713
1175	sp|P36543|VATE1_HUMAN	sp|P36543|VATE1_HUMAN	7	sp|P36543|VATE1_HUMAN V-type proton ATPase subunit E 1 OS=Homo sapiens OX=9606 GN=ATP6V1E1 PE=1 SV=1	0.124746	0.833111	sp|P36543|VATE1_HUMAN	0.708365	0.32575	1.09098	0.478929	3.96968	0.001389	0.0233054	0	222850000	85737000	93871000	61039000	299050000	221160000	146150000	521880000	414820000	393090000	235240000	210870000	186160000	287040000	0.435187	-0.0784296	-0.0800221	-0.309252	0.251996	0.468335	0.185408	1.43218	1.12707	1.08513	0.551606	0.517973	0.422454	0.695368	0.124746	0.833111	0.708365	0.001389	0.0233054
3939	sp|Q9NQ55|SSF1_HUMAN	sp|Q9NQ55|SSF1_HUMAN	11	sp|Q9NQ55|SSF1_HUMAN Suppressor of SWI4 1 homolog OS=Homo sapiens OX=9606 GN=PPAN PE=2 SV=1	0.155421	0.860995	sp|Q9NQ55|SSF1_HUMAN	0.705574	0.332786	1.07836	0.508208	4.05827	0.00116729	0.0206505	0	167360000	107210000	176150000	74781000	227880000	155640000	149040000	257260000	364200000	480370000	339880000	273420000	191370000	322310000	0.0219806	0.240487	0.807469	-0.0151445	-0.142793	-0.0374304	0.213379	0.405979	0.937972	1.38126	1.08172	0.895652	0.462077	0.862307	0.155421	0.860995	0.705574	0.00116729	0.0206505
2645	sp|Q7LBC6|KDM3B_HUMAN	sp|Q7LBC6|KDM3B_HUMAN	31	sp|Q7LBC6|KDM3B_HUMAN Lysine-specific demethylase 3B OS=Homo sapiens OX=9606 GN=KDM3B PE=1 SV=2	1.22061	1.91484	sp|Q7LBC6|KDM3B_HUMAN	0.694233	0.308307	1.08016	1.56772	3.85711	0.00173395	0.0264423	0	444480000	189970000	294220000	122240000	371360000	513000000	388640000	756470000	831120000	677100000	543920000	454770000	519880000	770110000	1.43145	1.05678	1.5308	0.696652	0.56656	1.67954	1.58248	1.97073	2.13681	1.88819	1.7591	1.63538	1.89669	2.11698	1.22061	1.91484	0.694233	0.00173395	0.0264423
1619	sp|P62140|PP1B_HUMAN	sp|P62140|PP1B_HUMAN	17	sp|P62140|PP1B_HUMAN Serine/threonine-protein phosphatase PP1-beta catalytic subunit OS=Homo sapiens OX=9606 GN=PPP1CB PE=1 SV=3	1.1438	1.83133	sp|P62140|PP1B_HUMAN	0.687524	0.304787	1.07026	1.48756	3.85166	0.00175268	0.0265616	0	263190000	249190000	243410000	191570000	544890000	506550000	181100000	723830000	758620000	837900000	517200000	436670000	417370000	644810000	0.675271	1.44396	1.26349	1.34739	1.12348	1.66132	0.491694	1.90675	2.00419	2.20287	1.68653	1.57633	1.58142	1.86119	1.1438	1.83133	0.687524	0.00175268	0.0265616
1903	sp|Q12899|TRI26_HUMAN	sp|Q12899|TRI26_HUMAN	6	sp|Q12899|TRI26_HUMAN Tripartite motif-containing protein 26 OS=Homo sapiens OX=9606 GN=TRIM26 PE=1 SV=1	-2.17405	-1.48825	sp|Q12899|TRI26_HUMAN	0.6858	0.320363	1.05124	-1.83115	4.02388	0.00124872	0.0214105	0	30837000	11977000	23743000	16039000	56323000	40367000	45038000	75156000	64136000	71148000	52314000	46216000	49291000	75636000	-2.41876	-2.88697	-2.01829	-2.24508	-2.17304	-1.98012	-1.49608	-1.37921	-1.58548	-1.43914	-1.61408	-1.68894	-1.48511	-1.22577	-2.17405	-1.48825	0.6858	0.00124872	0.0214105
2546	sp|Q6P5Z2|PKN3_HUMAN	sp|Q6P5Z2|PKN3_HUMAN	9	sp|Q6P5Z2|PKN3_HUMAN Serine/threonine-protein kinase N3 OS=Homo sapiens OX=9606 GN=PKN3 PE=1 SV=1	-0.480659	0.204915	sp|Q6P5Z2|PKN3_HUMAN	0.685574	0.391207	0.979941	-0.137872	4.99374	0.000195014	0.00688854	0	110720000	68503000	78666000	35435000	220800000	147070000	80976000	202720000	228310000	225820000	209690000	160300000	162550000	191860000	-0.574186	-0.398633	-0.329188	-1.09693	-0.188638	-0.118961	-0.658075	0.0603189	0.259415	0.266537	0.385973	0.119318	0.227772	0.115067	-0.480659	0.204915	0.685574	0.000195014	0.00688854
1306	sp|P48059|LIMS1_HUMAN	sp|P48059|LIMS1_HUMAN	8	sp|P48059|LIMS1_HUMAN LIM and senescent cell antigen-like-containing domain protein 1 OS=Homo sapiens OX=9606 GN=LIMS1 PE=1 SV=4	-0.403979	0.279823	sp|P48059|LIMS1_HUMAN	0.683802	0.28518	1.08242	-0.0620783	3.67815	0.00247096	0.0320679	0	133070000	84924000	52529000	56539000	169450000	197750000	71177000	198140000	212300000	186760000	236900000	225380000	197090000	191310000	-0.30886	-0.0920246	-0.898621	-0.420177	-0.573126	0.307276	-0.842324	0.0271663	0.153775	-0.01393	0.561736	0.614725	0.504354	0.110932	-0.403979	0.279823	0.683802	0.00247096	0.0320679
3882	sp|Q9HB90|RRAGC_HUMAN;sp|Q9NQL2|RRAGD_HUMAN	sp|Q9HB90|RRAGC_HUMAN	5	sp|Q9HB90|RRAGC_HUMAN Ras-related GTP-binding protein C OS=Homo sapiens OX=9606 GN=RRAGC PE=1 SV=1;sp|Q9NQL2|RRAGD_HUMAN Ras-related GTP-binding protein D OS=Homo sapiens OX=9606 GN=RRAGD PE=1 SV=1	-1.71708	-1.03686	sp|Q9HB90|RRAGC_HUMAN	0.680213	0.383813	0.976614	-1.37697	4.9207	0.000223448	0.00755222	0	72252000	23398000	24206000	20621000	66537000	64706000	36561000	94186000	95933000	102300000	82605000	66935000	57313000	93011000	-1.19012	-1.93144	-1.99106	-1.8811	-1.93096	-1.30089	-1.79395	-1.05177	-1.00043	-0.902844	-0.956016	-1.15042	-1.26866	-0.927901	-1.71708	-1.03686	0.680213	0.000223448	0.00755222
3498	sp|Q99829|CPNE1_HUMAN	sp|Q99829|CPNE1_HUMAN	15	sp|Q99829|CPNE1_HUMAN Copine-1 OS=Homo sapiens OX=9606 GN=CPNE1 PE=1 SV=1	1.86838	2.54085	sp|Q99829|CPNE1_HUMAN	0.67247	0.394237	0.950703	2.20462	5.18232	0.000137661	0.00548477	0	682460000	276340000	324970000	247330000	1276000000	591230000	454230000	1178200000	1137100000	1237200000	962440000	898170000	626630000	957640000	2.05021	1.59153	1.67096	1.71742	2.35945	1.88385	1.80525	2.61354	2.59228	2.7784	2.58119	2.62486	2.16478	2.43092	1.86838	2.54085	0.67247	0.000137661	0.00548477
4575	sp|Q9Y5P4|C43BP_HUMAN	sp|Q9Y5P4|C43BP_HUMAN	15	sp|Q9Y5P4|C43BP_HUMAN Collagen type IV alpha-3-binding protein OS=Homo sapiens OX=9606 GN=COL4A3BP PE=1 SV=1	0.395425	1.06216	sp|Q9Y5P4|C43BP_HUMAN	0.666737	0.274613	1.05886	0.728793	3.64579	0.00263488	0.033098	0	221560000	148970000	176200000	69039000	185340000	256110000	212140000	418830000	393020000	353040000	349180000	307940000	294910000	373600000	0.42681	0.70987	0.807869	-0.130864	-0.442928	0.679543	0.717673	1.11305	1.04863	0.92644	1.12061	1.06852	1.08287	1.07502	0.395425	1.06216	0.666737	0.00263488	0.033098
795	sp|P11279|LAMP1_HUMAN	sp|P11279|LAMP1_HUMAN	7	sp|P11279|LAMP1_HUMAN Lysosome-associated membrane glycoprotein 1 OS=Homo sapiens OX=9606 GN=LAMP1 PE=1 SV=3	1.53501	2.19728	sp|P11279|LAMP1_HUMAN	0.662271	0.358268	0.966274	1.86615	4.67109	0.000357547	0.00997035	0	557130000	281250000	207640000	244510000	572030000	605240000	371790000	825610000	712160000	765700000	809750000	694870000	782310000	835170000	1.75741	1.61666	1.03938	1.70081	1.19409	1.91756	1.51916	2.09762	1.91236	2.0698	2.33234	2.25174	2.4833	2.23381	1.53501	2.19728	0.662271	0.000357547	0.00997035
734	sp|P08648|ITA5_HUMAN	sp|P08648|ITA5_HUMAN	4	sp|P08648|ITA5_HUMAN Integrin alpha-5 OS=Homo sapiens OX=9606 GN=ITGA5 PE=1 SV=2	-1.51182	-0.85095	sp|P08648|ITA5_HUMAN	0.660866	0.324231	0.997501	-1.18138	4.20934	0.000869013	0.0174987	0	59196000	40002000	24357000	30851000	67879000	48093000	62462000	109830000	89819000	91811000	83466000	95090000	85666000	109230000	-1.47772	-1.16623	-1.98229	-1.29759	-1.90196	-1.72803	-1.0289	-0.82884	-1.09612	-1.0626	-0.941079	-0.639948	-0.6917	-0.696363	-1.51182	-0.85095	0.660866	0.000869013	0.0174987
4254	sp|Q9UH65|SWP70_HUMAN	sp|Q9UH65|SWP70_HUMAN	19	sp|Q9UH65|SWP70_HUMAN Switch-associated protein 70 OS=Homo sapiens OX=9606 GN=SWAP70 PE=1 SV=1	0.614128	1.27302	sp|Q9UH65|SWP70_HUMAN	0.658891	0.353002	0.96478	0.943573	4.6186	0.000395065	0.0106667	0	280740000	145280000	158830000	76449000	484320000	279390000	172350000	436410000	526270000	452970000	378390000	321380000	280770000	534810000	0.768421	0.674081	0.661529	0.0168081	0.952318	0.804784	0.420953	1.1727	1.47284	1.29453	1.23634	1.13063	1.01234	1.59176	0.614128	1.27302	0.658891	0.000395065	0.0106667
364	sp|O60610|DIAP1_HUMAN	sp|O60610|DIAP1_HUMAN	29	sp|O60610|DIAP1_HUMAN Protein diaphanous homolog 1 OS=Homo sapiens OX=9606 GN=DIAPH1 PE=1 SV=2	1.21732	1.87011	sp|O60610|DIAP1_HUMAN	0.652792	0.275765	1.02982	1.54372	3.71247	0.00230838	0.0307004	0	448460000	260880000	286430000	97604000	459770000	393380000	374580000	621090000	767110000	573580000	560170000	522980000	557420000	764140000	1.44431	1.50938	1.49296	0.370654	0.876757	1.29734	1.52984	1.68466	2.02036	1.64316	1.8015	1.83856	1.99677	2.10577	1.21732	1.87011	0.652792	0.00230838	0.0307004
1834	sp|Q06210|GFPT1_HUMAN	sp|Q06210|GFPT1_HUMAN	32	sp|Q06210|GFPT1_HUMAN Glutamine--fructose-6-phosphate aminotransferase [isomerizing] 1 OS=Homo sapiens OX=9606 GN=GFPT1 PE=1 SV=3	3.86934	4.50255	sp|Q06210|GFPT1_HUMAN	0.63321	0.418282	0.848138	4.18594	6.31707	1.87377e-05	0.00141983	0	2816600000	1351000000	1420400000	1120100000	2995500000	2402900000	2076500000	4336000000	4715000000	4610200000	3597400000	2842000000	2774300000	4179500000	4.09578	3.85595	3.7507	3.90522	3.59903	3.9024	3.97628	4.50383	4.65886	4.72102	4.48059	4.29963	4.30049	4.55341	3.86934	4.50255	0.63321	1.87377e-05	0.00141983
1997	sp|Q13557|KCC2D_HUMAN	sp|Q13557|KCC2D_HUMAN	9	sp|Q13557|KCC2D_HUMAN Calcium/calmodulin-dependent protein kinase type II subunit delta OS=Homo sapiens OX=9606 GN=CAMK2D PE=1 SV=3	-0.594394	0.0366659	sp|Q13557|KCC2D_HUMAN	0.63106	0.291196	0.970923	-0.278864	3.98131	0.0013576	0.0230252	0	120800000	51308000	50598000	64031000	137220000	129760000	88504000	188120000	226950000	209400000	179770000	103870000	124250000	234520000	-0.448455	-0.811048	-0.951431	-0.239937	-0.879572	-0.299222	-0.531092	-0.0481191	0.250734	0.15505	0.164193	-0.511544	-0.157929	0.404277	-0.594394	0.0366659	0.63106	0.0013576	0.0230252
254	sp|O15533|TPSN_HUMAN	sp|O15533|TPSN_HUMAN	4	sp|O15533|TPSN_HUMAN Tapasin OS=Homo sapiens OX=9606 GN=TAPBP PE=1 SV=1	-0.0938754	0.534639	sp|O15533|TPSN_HUMAN	0.628514	0.256369	1.00066	0.220382	3.62129	0.00276623	0.0341993	0	192490000	89952000	106140000	75606000	129130000	133160000	154510000	271650000	304370000	309200000	180710000	238640000	194100000	250240000	0.223853	-0.00995076	0.0931819	0.000747538	-0.967837	-0.261989	0.264867	0.48494	0.677215	0.730625	0.171706	0.697843	0.48241	0.497734	-0.0938754	0.534639	0.628514	0.00276623	0.0341993
2124	sp|Q14938|NFIX_HUMAN;sp|Q12857|NFIA_HUMAN	sp|Q14938|NFIX_HUMAN	4	sp|Q14938|NFIX_HUMAN Nuclear factor 1 X-type OS=Homo sapiens OX=9606 GN=NFIX PE=1 SV=2;sp|Q12857|NFIA_HUMAN Nuclear factor 1 A-type OS=Homo sapiens OX=9606 GN=NFIA PE=1 SV=2	-2.4217	-1.79366	sp|Q14938|NFIX_HUMAN	0.628044	0.298	0.958088	-2.10768	4.08017	0.00111827	0.0202062	0	33820000	24647000	21641000	9056500	39460000	29873000	22556000	56024000	61087000	56220000	43238000	38141000	41076000	54288000	-2.28552	-1.85723	-2.149	-3.07292	-2.68987	-2.4135	-2.48387	-1.80542	-1.65625	-1.78692	-1.88858	-1.96815	-1.74683	-1.70347	-2.4217	-1.79366	0.628044	0.00111827	0.0202062
1093	sp|P30508|1C12_HUMAN;sp|Q07000|1C15_HUMAN;sp|P30510|1C14_HUMAN;sp|Q29960|1C16_HUMAN;sp|P30504|1C04_HUMAN;sp|P30505|1C08_HUMAN;sp|P30501|1C02_HUMAN	sp|P30508|1C12_HUMAN	11	sp|P30508|1C12_HUMAN HLA class I histocompatibility antigen, Cw-12 alpha chain OS=Homo sapiens OX=9606 GN=HLA-C PE=1 SV=2;sp|Q07000|1C15_HUMAN HLA class I histocompatibility antigen, Cw-15 alpha chain OS=Homo sapiens OX=9606 GN=HLA-C PE=1 SV=1;sp|P30510|1C	-3.18032	-2.55248	sp|P30508|1C12_HUMAN	0.627841	0.246207	1.00947	-2.84226	3.55293	0.00351989	0.0393725	1	23472000	9904900	9193800	7237800	NA	22475000	10810000	35091000	36216000	27601000	24793000	29869000	16540000	42272000	-2.81257	-3.15802	-3.35607	-3.39761	NA	-2.82312	-3.53456	-2.48414	-2.41588	-2.83755	-2.68977	-2.32358	-3.05261	-2.06384	-3.18032	-2.55248	0.627841	0.00351989	0.0393725
2002	sp|Q13576|IQGA2_HUMAN	sp|Q13576|IQGA2_HUMAN	5	sp|Q13576|IQGA2_HUMAN Ras GTPase-activating-like protein IQGAP2 OS=Homo sapiens OX=9606 GN=IQGAP2 PE=1 SV=4	0.0456493	0.673478	sp|Q13576|IQGA2_HUMAN	0.627829	0.287634	0.968024	0.359564	3.95707	0.00142388	0.0233894	0	197910000	91760000	99198000	54872000	363420000	189580000	105600000	324190000	273310000	238870000	261850000	204090000	288160000	325500000	0.263922	0.0184447	-0.00219381	-0.463525	0.535167	0.246539	-0.278809	0.741457	0.520816	0.349506	0.705987	0.470458	1.04963	0.876494	0.0456493	0.673478	0.627829	0.00142388	0.0233894
2634	sp|Q7L523|RRAGA_HUMAN;sp|Q5VZM2|RRAGB_HUMAN	sp|Q7L523|RRAGA_HUMAN	6	sp|Q7L523|RRAGA_HUMAN Ras-related GTP-binding protein A OS=Homo sapiens OX=9606 GN=RRAGA PE=1 SV=1;sp|Q5VZM2|RRAGB_HUMAN Ras-related GTP-binding protein B OS=Homo sapiens OX=9606 GN=RRAGB PE=1 SV=1	-0.729087	-0.110794	sp|Q7L523|RRAGA_HUMAN	0.618292	0.376127	0.860457	-0.419941	5.47448	8.10039e-05	0.00400702	0	107290000	41211000	65442000	53397000	177020000	100860000	59553000	184760000	176410000	182760000	143240000	130000000	127020000	169260000	-0.619596	-1.12374	-0.588699	-0.502993	-0.509642	-0.661915	-1.09702	-0.0742653	-0.115308	-0.0459038	-0.163045	-0.185294	-0.126278	-0.0654663	-0.729087	-0.110794	0.618292	8.10039e-05	0.00400702
234	sp|O15294|OGT1_HUMAN	sp|O15294|OGT1_HUMAN	22	sp|O15294|OGT1_HUMAN UDP-N-acetylglucosamine--peptide N-acetylglucosaminyltransferase 110 kDa subunit OS=Homo sapiens OX=9606 GN=OGT PE=1 SV=3	0.906696	1.52342	sp|O15294|OGT1_HUMAN	0.616724	0.376444	0.857004	1.21506	5.50344	7.69051e-05	0.00388495	0	300840000	201610000	175290000	118330000	397160000	341840000	282650000	465380000	599020000	620970000	471790000	405600000	403320000	475090000	0.868204	1.14163	0.800568	0.649564	0.664124	1.09519	1.12759	1.26594	1.66098	1.7604	1.55415	1.46901	1.53226	1.42119	0.906696	1.52342	0.616724	7.69051e-05	0.00388495
3815	sp|Q9H6F5|CCD86_HUMAN	sp|Q9H6F5|CCD86_HUMAN	11	sp|Q9H6F5|CCD86_HUMAN Coiled-coil domain-containing protein 86 OS=Homo sapiens OX=9606 GN=CCDC86 PE=1 SV=1	1.31954	1.93564	sp|Q9H6F5|CCD86_HUMAN	0.616094	0.274298	0.95789	1.62759	3.86492	0.0017074	0.0262996	0	448620000	309160000	240850000	142060000	451010000	564810000	299560000	693340000	697240000	720330000	670200000	555270000	656270000	548180000	1.44483	1.75166	1.24858	0.914299	0.848815	1.81804	1.21059	1.84431	1.8816	1.97959	2.05985	1.92567	2.23112	1.62732	1.31954	1.93564	0.616094	0.0017074	0.0262996
189	sp|O14964|HGS_HUMAN	sp|O14964|HGS_HUMAN	18	sp|O14964|HGS_HUMAN Hepatocyte growth factor-regulated tyrosine kinase substrate OS=Homo sapiens OX=9606 GN=HGS PE=1 SV=1	1.58382	2.19845	sp|O14964|HGS_HUMAN	0.614627	0.314748	0.914506	1.89114	4.39467	0.000606822	0.0141745	0	532080000	248600000	219020000	238130000	952160000	602890000	326100000	953420000	1010600000	943130000	653980000	597310000	536440000	866100000	1.69103	1.44058	1.11461	1.66252	1.93422	1.91196	1.33185	2.30643	2.42092	2.37759	2.02456	2.03178	1.9417	2.28619	1.58382	2.19845	0.614627	0.000606822	0.0141745
1453	sp|P52594|AGFG1_HUMAN	sp|P52594|AGFG1_HUMAN	4	sp|P52594|AGFG1_HUMAN Arf-GAP domain and FG repeat-containing protein 1 OS=Homo sapiens OX=9606 GN=AGFG1 PE=1 SV=2	-0.0812883	0.533054	sp|P52594|AGFG1_HUMAN	0.614342	0.272692	0.955992	0.225883	3.85558	0.00173918	0.0264423	0	232180000	95963000	88524000	57169000	175720000	197830000	99319000	317820000	302860000	292420000	239550000	195350000	192580000	209940000	0.494371	0.0823497	-0.162717	-0.404126	-0.520349	0.307858	-0.366405	0.712667	0.669989	0.648223	0.577761	0.406823	0.471124	0.24479	-0.0812883	0.533054	0.614342	0.00173918	0.0264423
1828	sp|Q05655|KPCD_HUMAN	sp|Q05655|KPCD_HUMAN	20	sp|Q05655|KPCD_HUMAN Protein kinase C delta type OS=Homo sapiens OX=9606 GN=PRKCD PE=1 SV=2	0.349227	0.960009	sp|Q05655|KPCD_HUMAN	0.610782	0.35266	0.868904	0.654618	5.07366	0.000168159	0.00622055	0	261580000	111150000	117330000	81436000	353180000	227920000	141380000	334440000	449930000	397980000	300680000	285580000	296600000	274260000	0.666416	0.291985	0.234511	0.10834	0.493651	0.511676	0.138008	0.786616	1.24512	1.10339	0.905183	0.958916	1.09107	0.629762	0.349227	0.960009	0.610782	0.000168159	0.00622055
1018	sp|P25788|PSA3_HUMAN	sp|P25788|PSA3_HUMAN	14	sp|P25788|PSA3_HUMAN Proteasome subunit alpha type-3 OS=Homo sapiens OX=9606 GN=PSMA3 PE=1 SV=2	3.50019	4.11085	sp|P25788|PSA3_HUMAN	0.61066	0.293549	0.927771	3.80552	4.12904	0.00101634	0.0188725	0	2053100000	991150000	785170000	866720000	3043800000	2616700000	1341200000	3733900000	3352100000	3419000000	3005800000	2108800000	2013400000	3090200000	3.63953	3.414	2.91484	3.53376	3.62226	4.0251	3.35187	4.28694	4.16314	4.27957	4.22177	3.8658	3.84031	4.11845	3.50019	4.11085	0.61066	0.00101634	0.0188725
1712	sp|P78346|RPP30_HUMAN	sp|P78346|RPP30_HUMAN	10	sp|P78346|RPP30_HUMAN Ribonuclease P protein subunit p30 OS=Homo sapiens OX=9606 GN=RPP30 PE=1 SV=1	0.370594	0.980999	sp|P78346|RPP30_HUMAN	0.610405	0.281465	0.939345	0.675797	3.97889	0.00136409	0.0230521	0	271100000	117010000	151600000	79262000	215830000	263620000	163590000	347980000	385570000	461600000	340320000	236850000	266320000	347960000	0.718	0.365297	0.595837	0.0691475	-0.221707	0.721148	0.346439	0.844193	1.02082	1.3224	1.08358	0.686896	0.93649	0.972609	0.370594	0.980999	0.610405	0.00136409	0.0230521
3683	sp|Q9BZF1|OSBL8_HUMAN	sp|Q9BZF1|OSBL8_HUMAN	21	sp|Q9BZF1|OSBL8_HUMAN Oxysterol-binding protein-related protein 8 OS=Homo sapiens OX=9606 GN=OSBPL8 PE=1 SV=3	1.2319	1.84037	sp|Q9BZF1|OSBL8_HUMAN	0.608473	0.269204	0.947742	1.53614	3.84554	0.001774	0.026627	0	493310000	262650000	264750000	151360000	335870000	434620000	312890000	620760000	690410000	628760000	611730000	498290000	553980000	647930000	1.58186	1.51903	1.38198	1.00615	0.420656	1.44086	1.27278	1.68389	1.8673	1.77881	1.92835	1.76825	1.98788	1.86814	1.2319	1.84037	0.608473	0.001774	0.026627
3340	sp|Q96IZ6|MET2A_HUMAN	sp|Q96IZ6|MET2A_HUMAN	7	sp|Q96IZ6|MET2A_HUMAN Methyltransferase-like protein 2A OS=Homo sapiens OX=9606 GN=METTL2A PE=1 SV=5	-2.55443	-1.94628	sp|Q96IZ6|MET2A_HUMAN	0.608142	0.233871	0.982413	-2.25035	3.48401	0.00363455	0.0403318	0	23042000	19714000	22903000	15010000	42859000	27216000	12403000	55066000	53138000	58168000	36936000	31481000	38050000	44844000	-2.83925	-2.17589	-2.06908	-2.34112	-2.56985	-2.54759	-3.33819	-1.83045	-1.85881	-1.73661	-2.11552	-2.24716	-1.85668	-1.97876	-2.55443	-1.94628	0.608142	0.00363455	0.0403318
2275	sp|Q16644|MAPK3_HUMAN	sp|Q16644|MAPK3_HUMAN	11	sp|Q16644|MAPK3_HUMAN MAP kinase-activated protein kinase 3 OS=Homo sapiens OX=9606 GN=MAPKAPK3 PE=1 SV=1	-0.0762704	0.528972	sp|Q16644|MAPK3_HUMAN	0.605242	0.234695	0.975789	0.226351	3.50224	0.00350501	0.0393725	0	178720000	54851000	83171000	58851000	372230000	163200000	135480000	252160000	283920000	278020000	237510000	171730000	193810000	333370000	0.116747	-0.71577	-0.250667	-0.362126	0.569959	0.0308476	0.0771162	0.37693	0.576156	0.573647	0.56544	0.219459	0.480264	0.910907	-0.0762704	0.528972	0.605242	0.00350501	0.0393725
3492	sp|Q99755|PI51A_HUMAN	sp|Q99755|PI51A_HUMAN	8	sp|Q99755|PI51A_HUMAN Phosphatidylinositol 4-phosphate 5-kinase type-1 alpha OS=Homo sapiens OX=9606 GN=PIP5K1A PE=1 SV=1	-1.32648	-0.725226	sp|Q99755|PI51A_HUMAN	0.60125	0.251024	0.951476	-1.02585	3.68101	0.00245699	0.0319749	0	65731000	32991000	30346000	28394000	178210000	58522000	45483000	139350000	112950000	142550000	78811000	86159000	77548000	103400000	-1.32662	-1.44118	-1.6723	-1.41779	-0.49991	-1.44549	-1.48204	-0.48348	-0.763158	-0.412863	-1.02375	-0.783346	-0.834615	-0.775373	-1.32648	-0.725226	0.60125	0.00245699	0.0319749
2169	sp|Q15125|EBP_HUMAN	sp|Q15125|EBP_HUMAN	3	sp|Q15125|EBP_HUMAN 3-beta-hydroxysteroid-Delta(8),Delta(7)-isomerase OS=Homo sapiens OX=9606 GN=EBP PE=1 SV=3	0.689876	1.28947	sp|Q15125|EBP_HUMAN	0.599599	0.267092	0.932106	0.989675	3.86653	0.00170201	0.0262996	0	225450000	128170000	188700000	91580000	389570000	261640000	330880000	401380000	536940000	491040000	324650000	367470000	323140000	503220000	0.451926	0.495284	0.90451	0.278381	0.636096	0.710295	1.35264	1.05131	1.50201	1.4137	1.01568	1.32548	1.21409	1.50405	0.689876	1.28947	0.599599	0.00170201	0.0262996
3427	sp|Q96S99|PKHF1_HUMAN	sp|Q96S99|PKHF1_HUMAN	3	sp|Q96S99|PKHF1_HUMAN Pleckstrin homology domain-containing family F member 1 OS=Homo sapiens OX=9606 GN=PLEKHF1 PE=1 SV=3	-2.28511	-1.68668	sp|Q96S99|PKHF1_HUMAN	0.59843	0.28709	0.909769	-1.98589	4.12135	0.00103172	0.019008	0	42026000	16922000	17591000	13959000	47395000	41241000	24437000	65649000	38627000	63772000	57926000	51758000	48934000	50028000	-1.97205	-2.3938	-2.44116	-2.44626	-2.42373	-1.94929	-2.36946	-1.57542	-2.32224	-1.60078	-1.46728	-1.52428	-1.49555	-1.82118	-2.28511	-1.68668	0.59843	0.00103172	0.019008
1721	sp|P82094|TMF1_HUMAN	sp|P82094|TMF1_HUMAN	20	sp|P82094|TMF1_HUMAN TATA element modulatory factor OS=Homo sapiens OX=9606 GN=TMF1 PE=1 SV=2	-0.406539	0.191399	sp|P82094|TMF1_HUMAN	0.597938	0.274425	0.921451	-0.10757	3.96301	0.00140736	0.0233318	0	98274000	77694000	110510000	45648000	164860000	125780000	100930000	212840000	283830000	184600000	168830000	144030000	185860000	204450000	-0.746257	-0.218987	0.150072	-0.730101	-0.613014	-0.344066	-0.34342	0.130993	0.575695	-0.0311098	0.0737443	-0.0362872	0.420139	0.20662	-0.406539	0.191399	0.597938	0.00140736	0.0233318
4100	sp|Q9NXV2|KCTD5_HUMAN	sp|Q9NXV2|KCTD5_HUMAN	3	sp|Q9NXV2|KCTD5_HUMAN BTB/POZ domain-containing protein KCTD5 OS=Homo sapiens OX=9606 GN=KCTD5 PE=1 SV=1	-1.38607	-0.796183	sp|Q9NXV2|KCTD5_HUMAN	0.589887	0.238762	0.941011	-1.09113	3.6022	0.00287315	0.0347888	0	52054000	27123000	32269000	26361000	83235000	94125000	71273000	116610000	128700000	121290000	93520000	79643000	73943000	86730000	-1.66325	-1.72064	-1.58567	-1.5254	-1.60572	-0.761401	-0.840398	-0.741938	-0.573483	-0.651381	-0.777233	-0.897682	-0.902948	-1.02862	-1.38607	-0.796183	0.589887	0.00287315	0.0347888
1829	sp|Q05682|CALD1_HUMAN	sp|Q05682|CALD1_HUMAN	32	sp|Q05682|CALD1_HUMAN Caldesmon OS=Homo sapiens OX=9606 GN=CALD1 PE=1 SV=3	2.7579	3.34613	sp|Q05682|CALD1_HUMAN	0.588233	0.300406	0.876061	3.05201	4.38205	0.000621774	0.0143191	0	1044800000	572630000	567670000	637060000	2271200000	1126000000	716270000	2233600000	1903900000	1940500000	1387600000	1367900000	1275900000	2107200000	2.66475	2.63117	2.45749	3.08785	3.19696	2.81123	2.45585	3.54148	3.3412	3.4431	3.10824	3.23648	3.18548	3.56693	2.7579	3.34613	0.588233	0.000621774	0.0143191
877	sp|P16403|H12_HUMAN	sp|P16403|H12_HUMAN	12	sp|P16403|H12_HUMAN Histone H1.2 OS=Homo sapiens OX=9606 GN=HIST1H1C PE=1 SV=2	3.84807	4.43444	sp|P16403|H12_HUMAN	0.586363	0.256823	0.915903	4.14126	3.81522	0.00188354	0.0277395	0	2558700000	1443600000	2074800000	857280000	3557800000	2113700000	1663100000	4326600000	5110600000	5233900000	2868700000	2394100000	2937800000	3429600000	3.95721	3.95055	4.28499	3.51789	3.84891	3.7178	3.65916	4.50068	4.77592	4.90841	4.15452	4.05028	4.38269	4.26856	3.84807	4.43444	0.586363	0.00188354	0.0277395
3914	sp|Q9HD45|TM9S3_HUMAN	sp|Q9HD45|TM9S3_HUMAN	10	sp|Q9HD45|TM9S3_HUMAN Transmembrane 9 superfamily member 3 OS=Homo sapiens OX=9606 GN=TM9SF3 PE=1 SV=2	1.10281	1.68726	sp|Q9HD45|TM9S3_HUMAN	0.584451	0.244511	0.924392	1.39504	3.68643	0.00243071	0.0318091	0	304250000	175900000	171360000	199530000	902110000	318680000	234910000	685740000	643700000	557500000	513360000	415940000	402380000	664970000	0.884468	0.946977	0.768595	1.40636	1.85579	0.994196	0.863314	1.82832	1.76551	1.60117	1.6758	1.50561	1.52891	1.90553	1.10281	1.68726	0.584451	0.00243071	0.0318091
636	sp|P02786|TFR1_HUMAN	sp|P02786|TFR1_HUMAN	38	sp|P02786|TFR1_HUMAN Transferrin receptor protein 1 OS=Homo sapiens OX=9606 GN=TFRC PE=1 SV=2	4.13772	4.72078	sp|P02786|TFR1_HUMAN	0.583064	0.229861	0.936268	4.42925	3.53958	0.00325408	0.0374402	0	2437300000	2414900000	2186100000	1214000000	2635500000	3454600000	2384300000	4886300000	5121000000	4044100000	4496700000	3373100000	4150400000	5072800000	3.88707	4.68471	4.35867	4.02182	3.41305	4.42499	4.17373	4.67717	4.77888	4.52754	4.80204	4.54872	4.87871	4.83243	4.13772	4.72078	0.583064	0.00325408	0.0374402
956	sp|P21333|FLNA_HUMAN	sp|P21333|FLNA_HUMAN	148	sp|P21333|FLNA_HUMAN Filamin-A OS=Homo sapiens OX=9606 GN=FLNA PE=1 SV=4	7.28572	7.86772	sp|P21333|FLNA_HUMAN	0.581998	0.38988	0.774116	7.57672	6.49552	1.39166e-05	0.00114702	0	23986000000	16564000000	17058000000	12883000000	34261000000	25679000000	20273000000	39638000000	51568000000	38798000000	37560000000	29406000000	33357000000	43606000000	7.18661	7.43229	7.25557	7.44302	7.13872	7.31263	7.2312	7.71412	8.1347	7.86678	7.85981	7.69697	7.87036	7.93131	7.28572	7.86772	0.581998	1.39166e-05	0.00114702
4461	sp|Q9Y2S6|TMA7_HUMAN	sp|Q9Y2S6|TMA7_HUMAN	4	sp|Q9Y2S6|TMA7_HUMAN Translation machinery-associated protein 7 OS=Homo sapiens OX=9606 GN=TMA7 PE=1 SV=1	2.02608	2.60562	sp|Q9Y2S6|TMA7_HUMAN	0.579541	0.263986	0.895095	2.31585	3.93795	0.00147848	0.0237062	0	593720000	462340000	426880000	235720000	910210000	788650000	572860000	1173800000	1442100000	1467500000	857690000	684530000	746710000	1078100000	1.8492	2.3259	2.05558	1.64778	1.86877	2.2986	2.13671	2.60811	2.93754	3.0305	2.4152	2.22994	2.41645	2.60159	2.02608	2.60562	0.579541	0.00147848	0.0237062
2585	sp|Q6XQN6|PNCB_HUMAN	sp|Q6XQN6|PNCB_HUMAN	13	sp|Q6XQN6|PNCB_HUMAN Nicotinate phosphoribosyltransferase OS=Homo sapiens OX=9606 GN=NAPRT PE=1 SV=2	0.507588	1.08709	sp|Q6XQN6|PNCB_HUMAN	0.579498	0.321844	0.837153	0.797337	4.82252	0.000268585	0.00841208	0	300330000	109540000	120100000	110020000	422750000	198990000	186490000	474990000	345060000	344420000	324100000	341100000	294640000	422600000	0.865755	0.271166	0.267413	0.544096	0.754823	0.316275	0.533588	1.29559	0.859531	0.889934	1.01323	1.21721	1.08155	1.25255	0.507588	1.08709	0.579498	0.000268585	0.00841208
2976	sp|Q8NHH9|ATLA2_HUMAN	sp|Q8NHH9|ATLA2_HUMAN	11	sp|Q8NHH9|ATLA2_HUMAN Atlastin-2 OS=Homo sapiens OX=9606 GN=ATL2 PE=1 SV=2	0.642956	1.21518	sp|Q8NHH9|ATLA2_HUMAN	0.572225	0.280637	0.863813	0.929069	4.20783	0.000871581	0.0174987	0	267380000	126180000	214370000	100070000	331410000	245360000	227810000	362320000	464510000	522710000	380280000	331640000	261380000	493710000	0.698062	0.472956	1.08435	0.406795	0.401238	0.617815	0.819474	0.902778	1.29146	1.50601	1.24352	1.17632	0.909613	1.47657	0.642956	1.21518	0.572225	0.000871581	0.0174987
4383	sp|Q9UNN8|EPCR_HUMAN	sp|Q9UNN8|EPCR_HUMAN	5	sp|Q9UNN8|EPCR_HUMAN Endothelial protein C receptor OS=Homo sapiens OX=9606 GN=PROCR PE=1 SV=1	-0.0528865	0.518823	sp|Q9UNN8|EPCR_HUMAN	0.571709	0.220635	0.922783	0.232968	3.4917	0.00357933	0.0399423	0	134700000	79900000	96885000	47424000	343700000	162830000	161570000	238390000	215010000	295030000	262240000	238120000	210960000	250280000	-0.291291	-0.179038	-0.0354608	-0.674816	0.454129	0.0275802	0.32869	0.295461	0.172205	0.661346	0.708131	0.694671	0.601979	0.497964	-0.0528865	0.518823	0.571709	0.00357933	0.0399423
3339	sp|Q96IZ0|PAWR_HUMAN	sp|Q96IZ0|PAWR_HUMAN	8	sp|Q96IZ0|PAWR_HUMAN PRKC apoptosis WT1 regulator protein OS=Homo sapiens OX=9606 GN=PAWR PE=1 SV=1	0.237686	0.809253	sp|Q96IZ0|PAWR_HUMAN	0.571567	0.239331	0.903803	0.52347	3.68876	0.0024195	0.0317508	0	224820000	107580000	77480000	68576000	438770000	225000000	143550000	310420000	369520000	320070000	307920000	246780000	233650000	311010000	0.447888	0.245403	-0.350608	-0.14061	0.808849	0.493115	0.159766	0.678489	0.959043	0.781651	0.939459	0.746609	0.748622	0.810898	0.237686	0.809253	0.571567	0.0024195	0.0317508
250	sp|O15498|YKT6_HUMAN	sp|O15498|YKT6_HUMAN	12	sp|O15498|YKT6_HUMAN Synaptobrevin homolog YKT6 OS=Homo sapiens OX=9606 GN=YKT6 PE=1 SV=1	0.560538	1.13118	sp|O15498|YKT6_HUMAN	0.570637	0.315167	0.826108	0.845857	4.78939	0.000285869	0.00867902	0	274450000	127770000	142310000	108460000	365150000	302460000	148280000	400460000	355940000	487520000	371870000	372710000	273800000	361830000	0.735722	0.490824	0.50667	0.523411	0.542065	0.918997	0.206076	1.04798	0.904639	1.40308	1.2113	1.34606	0.976252	1.02891	0.560538	1.13118	0.570637	0.000285869	0.00867902
2597	sp|Q6ZRP7|QSOX2_HUMAN	sp|Q6ZRP7|QSOX2_HUMAN	12	sp|Q6ZRP7|QSOX2_HUMAN Sulfhydryl oxidase 2 OS=Homo sapiens OX=9606 GN=QSOX2 PE=1 SV=3	0.400539	0.970389	sp|Q6ZRP7|QSOX2_HUMAN	0.56985	0.203944	0.935755	0.685464	3.33927	0.00484891	0.0484755	0	254930000	63285000	176410000	112780000	341920000	202030000	183690000	374890000	419760000	304270000	346830000	268150000	294880000	337430000	0.629257	-0.511685	0.809548	0.579984	0.446587	0.3381	0.511978	0.952256	1.14427	0.706888	1.11088	0.867355	1.08272	0.928344	0.400539	0.970389	0.56985	0.00484891	0.0484755
3057	sp|Q8WUH6|TM263_HUMAN	sp|Q8WUH6|TM263_HUMAN	3	sp|Q8WUH6|TM263_HUMAN Transmembrane protein 263 OS=Homo sapiens OX=9606 GN=TMEM263 PE=1 SV=1	0.00295805	0.571247	sp|Q8WUH6|TM263_HUMAN	0.568289	0.32275	0.813828	0.287103	4.96261	0.000206644	0.00708621	0	177010000	88518000	103860000	61554000	286940000	144380000	141460000	314260000	259860000	309320000	218400000	168290000	228870000	302330000	0.102874	-0.0328813	0.062563	-0.297082	0.191951	-0.145535	0.138816	0.696325	0.447492	0.731198	0.444602	0.190039	0.71895	0.770125	0.00295805	0.571247	0.568289	0.000206644	0.00708621
3697	sp|Q9C037|TRIM4_HUMAN	sp|Q9C037|TRIM4_HUMAN	3	sp|Q9C037|TRIM4_HUMAN E3 ubiquitin-protein ligase TRIM4 OS=Homo sapiens OX=9606 GN=TRIM4 PE=1 SV=2	3.38496	3.95258	sp|Q9C037|TRIM4_HUMAN	0.567619	0.249335	0.885904	3.66877	3.82386	0.00185164	0.0274416	0	1668200000	806590000	778050000	724760000	3887200000	2169400000	1316500000	3026000000	2743400000	3151700000	2301600000	2211100000	1997300000	2955100000	3.33996	3.11999	2.902	3.27466	3.97753	3.75524	3.32532	3.98197	3.87198	4.15935	3.83722	3.93467	3.82878	4.05406	3.38496	3.95258	0.567619	0.00185164	0.0274416
4030	sp|Q9NVD7|PARVA_HUMAN	sp|Q9NVD7|PARVA_HUMAN	8	sp|Q9NVD7|PARVA_HUMAN Alpha-parvin OS=Homo sapiens OX=9606 GN=PARVA PE=1 SV=1	-0.927479	-0.366005	sp|Q9NVD7|PARVA_HUMAN	0.561474	0.292809	0.83014	-0.646742	4.48104	0.000513918	0.0126408	0	101880000	52813000	49672000	30214000	157230000	71997000	68649000	160950000	111350000	146500000	129350000	132540000	113360000	136580000	-0.694257	-0.769796	-0.977476	-1.32781	-0.681846	-1.14719	-0.893982	-0.274418	-0.783888	-0.372498	-0.309984	-0.157161	-0.289602	-0.374483	-0.927479	-0.366005	0.561474	0.000513918	0.0126408
429	sp|O75396|SC22B_HUMAN	sp|O75396|SC22B_HUMAN	8	sp|O75396|SC22B_HUMAN Vesicle-trafficking protein SEC22b OS=Homo sapiens OX=9606 GN=SEC22B PE=1 SV=4	1.30821	1.86955	sp|O75396|SC22B_HUMAN	0.561345	0.247675	0.875015	1.58888	3.83722	0.00180338	0.0268962	0	513640000	158870000	198600000	195630000	856530000	457630000	270660000	716440000	628170000	651880000	561630000	607690000	520610000	649700000	1.64013	0.801678	0.976611	1.37776	1.78048	1.51512	1.06567	1.89186	1.73002	1.83214	1.80525	2.05683	1.8987	1.87207	1.30821	1.86955	0.561345	0.00180338	0.0268962
1295	sp|P46940|IQGA1_HUMAN	sp|P46940|IQGA1_HUMAN	77	sp|P46940|IQGA1_HUMAN Ras GTPase-activating-like protein IQGAP1 OS=Homo sapiens OX=9606 GN=IQGAP1 PE=1 SV=1	4.5281	5.08641	sp|P46940|IQGA1_HUMAN	0.558316	0.280247	0.836384	4.80725	4.30516	0.000721455	0.0157646	0	3425500000	2254800000	2017500000	1821400000	8317400000	3932600000	2399400000	6450900000	7119200000	5885100000	5326400000	4136300000	5012300000	6301000000	4.3782	4.58683	4.2455	4.60943	5.08242	4.61154	4.18275	5.08017	5.25757	5.08159	5.04597	4.84527	5.14957	5.14474	4.5281	5.08641	0.558316	0.000721455	0.0157646
3599	sp|Q9BUN8|DERL1_HUMAN	sp|Q9BUN8|DERL1_HUMAN	5	sp|Q9BUN8|DERL1_HUMAN Derlin-1 OS=Homo sapiens OX=9606 GN=DERL1 PE=1 SV=1	0.0496663	0.607694	sp|Q9BUN8|DERL1_HUMAN	0.558028	0.320895	0.79516	0.32868	5.04575	0.000177072	0.00639911	0	158780000	100030000	106700000	84804000	209830000	154210000	159000000	308940000	316110000	328680000	210420000	199100000	185850000	305200000	-0.0539612	0.141576	0.100602	0.167039	-0.262659	-0.0507177	0.305786	0.671555	0.732206	0.820853	0.39098	0.434468	0.420061	0.783734	0.0496663	0.607694	0.558028	0.000177072	0.00639911
809	sp|P12268|IMDH2_HUMAN	sp|P12268|IMDH2_HUMAN	29	sp|P12268|IMDH2_HUMAN Inosine-5-monophosphate dehydrogenase 2 OS=Homo sapiens OX=9606 GN=IMPDH2 PE=1 SV=2	4.86783	5.41384	sp|P12268|IMDH2_HUMAN	0.546009	0.322302	0.769716	5.14083	5.23337	0.000125377	0.00518876	0	4154700000	2672200000	2931400000	1827600000	9257800000	5443800000	3921800000	8012000000	7524300000	8237500000	6973400000	6273800000	5545200000	7556300000	4.65669	4.82917	4.77232	4.61435	5.23801	5.07964	4.8846	5.39458	5.33798	5.5782	5.4341	5.45094	5.29461	5.40644	4.86783	5.41384	0.546009	0.000125377	0.00518876
965	sp|P22059|OSBP1_HUMAN	sp|P22059|OSBP1_HUMAN	26	sp|P22059|OSBP1_HUMAN Oxysterol-binding protein 1 OS=Homo sapiens OX=9606 GN=OSBP PE=1 SV=1	2.03247	2.57385	sp|P22059|OSBP1_HUMAN	0.541386	0.278876	0.803897	2.30316	4.42202	0.000575665	0.0137283	0	926630000	368890000	415520000	234030000	1059000000	713400000	463520000	1014700000	1154800000	1157800000	935890000	787200000	809130000	1254000000	2.49155	2.00371	2.01755	1.63736	2.08869	2.15425	1.83417	2.3968	2.61472	2.68044	2.54089	2.43312	2.53169	2.8193	2.03247	2.57385	0.541386	0.000575665	0.0137283
535	sp|O95163|ELP1_HUMAN	sp|O95163|ELP1_HUMAN	40	sp|O95163|ELP1_HUMAN Elongator complex protein 1 OS=Homo sapiens OX=9606 GN=ELP1 PE=1 SV=3	2.11264	2.65092	sp|O95163|ELP1_HUMAN	0.53828	0.245475	0.831085	2.38178	3.94176	0.00146744	0.0236908	0	740550000	423680000	453910000	243700000	813370000	747480000	822950000	1038800000	1279300000	1183400000	1068100000	875280000	893960000	1119600000	2.16808	2.2013	2.14215	1.69601	1.70537	2.22142	2.65418	2.43085	2.76349	2.71274	2.73125	2.58733	2.67481	2.656	2.11264	2.65092	0.53828	0.00146744	0.0236908
326	sp|O43865|SAHH2_HUMAN	sp|O43865|SAHH2_HUMAN	17	sp|O43865|SAHH2_HUMAN S-adenosylhomocysteine hydrolase-like protein 1 OS=Homo sapiens OX=9606 GN=AHCYL1 PE=1 SV=2	1.36	1.89363	sp|O43865|SAHH2_HUMAN	0.533626	0.370667	0.696584	1.62681	7.02135	5.94074e-06	0.000547247	0	478460000	240850000	269440000	191430000	580400000	382420000	333040000	685460000	711960000	741490000	604830000	507680000	528870000	646360000	1.53775	1.39539	1.40674	1.34633	1.21519	1.25667	1.36194	1.82773	1.91196	2.02235	1.91201	1.79539	1.9213	1.86465	1.36	1.89363	0.533626	5.94074e-06	0.000547247
1180	sp|P36871|PGM1_HUMAN	sp|P36871|PGM1_HUMAN	29	sp|P36871|PGM1_HUMAN Phosphoglucomutase-1 OS=Homo sapiens OX=9606 GN=PGM1 PE=1 SV=3	2.53822	3.06876	sp|P36871|PGM1_HUMAN	0.530533	0.271551	0.789515	2.80349	4.39242	0.000609463	0.0141745	0	1153500000	441310000	507710000	371250000	1920100000	951000000	777830000	1590000000	1531200000	1676900000	1244300000	1133600000	1119200000	1713300000	2.80757	2.25948	2.30009	2.30571	2.95303	2.56807	2.57363	3.0484	3.02465	3.22749	2.95122	2.96332	2.99738	3.26884	2.53822	3.06876	0.530533	0.000609463	0.0141745
3107	sp|Q92499|DDX1_HUMAN	sp|Q92499|DDX1_HUMAN	35	sp|Q92499|DDX1_HUMAN ATP-dependent RNA helicase DDX1 OS=Homo sapiens OX=9606 GN=DDX1 PE=1 SV=2	3.825	4.35215	sp|Q92499|DDX1_HUMAN	0.52715	0.340308	0.713993	4.08858	6.04951	2.95111e-05	0.00200932	0	2112700000	1449600000	1523800000	1146300000	3993100000	2056300000	1657700000	4029700000	4102100000	3813200000	3264700000	2631700000	2833800000	3531400000	3.68083	3.95647	3.84978	3.93871	4.01657	3.67816	3.65452	4.39754	4.45653	4.44072	4.3408	4.18785	4.33095	4.31069	3.825	4.35215	0.52715	2.95111e-05	0.00200932
2210	sp|Q15437|SC23B_HUMAN	sp|Q15437|SC23B_HUMAN	27	sp|Q15437|SC23B_HUMAN Protein transport protein Sec23B OS=Homo sapiens OX=9606 GN=SEC23B PE=1 SV=2	2.47757	3.00186	sp|Q15437|SC23B_HUMAN	0.524293	0.283222	0.765365	2.73971	4.66325	0.000362905	0.00997035	0	929370000	571940000	627580000	329270000	1056300000	1084900000	817200000	1592600000	1551400000	1429800000	1321200000	1178800000	1037600000	1402000000	2.49581	2.62945	2.59896	2.1319	2.08498	2.7577	2.64416	3.05077	3.0437	2.99207	3.0376	3.02017	2.8887	2.98	2.47757	3.00186	0.524293	0.000362905	0.00997035
4515	sp|Q9Y3I0|RTCB_HUMAN	sp|Q9Y3I0|RTCB_HUMAN	24	sp|Q9Y3I0|RTCB_HUMAN tRNA-splicing ligase RtcB homolog OS=Homo sapiens OX=9606 GN=RTCB PE=1 SV=1	4.08092	4.60416	sp|Q9Y3I0|RTCB_HUMAN	0.523241	0.294859	0.751622	4.34254	4.91248	0.000226904	0.00761424	0	2343400000	1386800000	1728300000	1671300000	4688800000	2831500000	2027300000	4269000000	4548700000	4470900000	3884100000	3832900000	3579000000	3954800000	3.83037	3.89327	4.02734	4.48486	4.24986	4.13867	3.94203	4.48123	4.60668	4.67571	4.59106	4.73451	4.66609	4.47381	4.08092	4.60416	0.523241	0.000226904	0.00761424
2493	sp|Q6GMV2|SMYD5_HUMAN	sp|Q6GMV2|SMYD5_HUMAN	7	sp|Q6GMV2|SMYD5_HUMAN SET and MYND domain-containing protein 5 OS=Homo sapiens OX=9606 GN=SMYD5 PE=1 SV=2	0.048494	0.571639	sp|Q6GMV2|SMYD5_HUMAN	0.523145	0.215478	0.830813	0.310067	3.64587	0.00263446	0.033098	0	179600000	101480000	89599000	61858000	377550000	172180000	110860000	309660000	299020000	346830000	220590000	199890000	160740000	280850000	0.123835	0.162111	-0.145697	-0.289946	0.590572	0.107954	-0.209372	0.674932	0.651448	0.900231	0.458976	0.440226	0.211698	0.663965	0.048494	0.571639	0.523145	0.00263446	0.033098
3013	sp|Q8TCT8|SPP2A_HUMAN	sp|Q8TCT8|SPP2A_HUMAN	2	sp|Q8TCT8|SPP2A_HUMAN Signal peptide peptidase-like 2A OS=Homo sapiens OX=9606 GN=SPPL2A PE=1 SV=2	-2.27969	-1.75881	sp|Q8TCT8|SPP2A_HUMAN	0.520883	0.215642	0.826124	-1.99922	3.68537	0.00273151	0.0339788	1	38463000	22556000	21390000	14544000	NA	23373000	26097000	45281000	54044000	65913000	42168000	46930000	48510000	53976000	-2.09989	-1.98373	-2.16545	-2.3868	NA	-2.76672	-2.27558	-2.11428	-1.83424	-1.55201	-1.92468	-1.66665	-1.50804	-1.71177	-2.27969	-1.75881	0.520883	0.00273151	0.0339788
2550	sp|Q6PCE3|PGM2L_HUMAN	sp|Q6PCE3|PGM2L_HUMAN	6	sp|Q6PCE3|PGM2L_HUMAN Glucose 1,6-bisphosphate synthase OS=Homo sapiens OX=9606 GN=PGM2L1 PE=1 SV=3	-1.8489	-1.32961	sp|Q6PCE3|PGM2L_HUMAN	0.519294	0.217679	0.820908	-1.58925	3.69166	0.00240564	0.0316574	0	51987000	29423000	30082000	15222000	53525000	45268000	41730000	59821000	87992000	81308000	67389000	62032000	50268000	73772000	-1.66511	-1.6045	-1.68462	-2.3208	-2.24705	-1.81517	-1.60505	-1.71029	-1.12598	-1.24202	-1.2493	-1.26102	-1.45694	-1.26171	-1.8489	-1.32961	0.519294	0.00240564	0.0316574
2262	sp|Q16537|2A5E_HUMAN	sp|Q16537|2A5E_HUMAN	7	sp|Q16537|2A5E_HUMAN Serine/threonine-protein phosphatase 2A 56 kDa regulatory subunit epsilon isoform OS=Homo sapiens OX=9606 GN=PPP2R5E PE=1 SV=1	-0.316044	0.202127	sp|Q16537|2A5E_HUMAN	0.518171	0.237193	0.799149	-0.0569584	3.95423	0.00143187	0.0234275	0	114810000	79038000	85527000	42728000	260040000	158320000	90773000	240980000	191100000	233890000	178380000	165130000	159190000	213820000	-0.521842	-0.194515	-0.211281	-0.82585	0.0489661	-0.0128538	-0.494931	0.311138	0.000912699	0.318392	0.153011	0.162479	0.197789	0.271169	-0.316044	0.202127	0.518171	0.00143187	0.0234275
2548	sp|Q6P996|PDXD1_HUMAN	sp|Q6P996|PDXD1_HUMAN	15	sp|Q6P996|PDXD1_HUMAN Pyridoxal-dependent decarboxylase domain-containing protein 1 OS=Homo sapiens OX=9606 GN=PDXDC1 PE=1 SV=2	0.433103	0.95082	sp|Q6P996|PDXD1_HUMAN	0.517718	0.217903	0.817533	0.691961	3.70255	0.00235426	0.0310683	0	177230000	180980000	137650000	113000000	247940000	214460000	181280000	359070000	328690000	351580000	381080000	278170000	255120000	358290000	0.104666	0.987602	0.459726	0.582807	-0.0202456	0.42405	0.493113	0.889706	0.78891	0.92032	1.24655	0.920693	0.874815	1.01475	0.433103	0.95082	0.517718	0.00235426	0.0310683
2222	sp|Q15645|PCH2_HUMAN	sp|Q15645|PCH2_HUMAN	12	sp|Q15645|PCH2_HUMAN Pachytene checkpoint protein 2 homolog OS=Homo sapiens OX=9606 GN=TRIP13 PE=1 SV=2	1.16592	1.68038	sp|Q15645|PCH2_HUMAN	0.514457	0.29318	0.735733	1.42315	4.9851	0.000198173	0.00694787	0	393390000	185630000	230750000	134780000	609000000	441930000	278450000	613270000	616070000	588200000	559780000	436110000	505360000	496020000	1.25525	1.0238	1.18817	0.838103	1.28506	1.46487	1.10621	1.66628	1.70176	1.68033	1.8005	1.57446	1.85602	1.4833	1.16592	1.68038	0.514457	0.000198173	0.00694787
1823	sp|Q05086|UBE3A_HUMAN	sp|Q05086|UBE3A_HUMAN	20	sp|Q05086|UBE3A_HUMAN Ubiquitin-protein ligase E3A OS=Homo sapiens OX=9606 GN=UBE3A PE=1 SV=4	0.54408	1.05386	sp|Q05086|UBE3A_HUMAN	0.509781	0.202853	0.816709	0.79897	3.56129	0.00311656	0.0365128	0	268810000	150540000	167620000	92669000	242360000	284840000	190730000	407020000	460630000	381760000	385440000	307810000	227890000	340320000	0.705759	0.72483	0.73748	0.295503	-0.0533092	0.832595	0.565702	1.07155	1.27927	1.04194	1.26294	1.0679	0.71279	0.940629	0.54408	1.05386	0.509781	0.00311656	0.0365128
3840	sp|Q9H857|NT5D2_HUMAN	sp|Q9H857|NT5D2_HUMAN	7	sp|Q9H857|NT5D2_HUMAN 5-nucleotidase domain-containing protein 2 OS=Homo sapiens OX=9606 GN=NT5DC2 PE=1 SV=1	-2.15849	-1.64905	sp|Q9H857|NT5D2_HUMAN	0.509449	0.233735	0.785162	-1.90377	3.9619	0.00141044	0.0233318	0	36686000	21232000	23713000	23374000	52639000	31814000	21424000	67250000	60256000	57233000	44130000	42066000	49149000	67392000	-2.16814	-2.07005	-2.02007	-1.69959	-2.27129	-2.32288	-2.55743	-1.54046	-1.67615	-1.76054	-1.85916	-1.82574	-1.48926	-1.39201	-2.15849	-1.64905	0.509449	0.00141044	0.0233318
2204	sp|Q15418|KS6A1_HUMAN	sp|Q15418|KS6A1_HUMAN	26	sp|Q15418|KS6A1_HUMAN Ribosomal protein S6 kinase alpha-1 OS=Homo sapiens OX=9606 GN=RPS6KA1 PE=1 SV=2	2.25326	2.76078	sp|Q15418|KS6A1_HUMAN	0.507516	0.205122	0.809911	2.50702	3.59862	0.00289366	0.0348575	0	782410000	423610000	609060000	222870000	1111600000	1005100000	686010000	1231300000	1324000000	1208900000	1143700000	1028300000	858900000	1256000000	2.24743	2.20107	2.55672	1.56659	2.1591	2.64772	2.39419	2.67749	2.81339	2.74422	2.82977	2.82158	2.61738	2.82159	2.25326	2.76078	0.507516	0.00289366	0.0348575
3446	sp|Q96TA1|NIBL1_HUMAN	sp|Q96TA1|NIBL1_HUMAN	28	sp|Q96TA1|NIBL1_HUMAN Niban-like protein 1 OS=Homo sapiens OX=9606 GN=FAM129B PE=1 SV=3	3.23441	3.74177	sp|Q96TA1|NIBL1_HUMAN	0.507363	0.247329	0.767397	3.48809	4.18359	0.000913718	0.0180798	0	1093900000	978890000	866620000	684150000	2809600000	1591600000	1439700000	2423400000	2520800000	2243500000	2139300000	2078600000	2192700000	2136400000	2.73102	3.39624	3.05401	3.19114	3.50596	3.3094	3.45311	3.6598	3.74902	3.65737	3.73188	3.84483	3.96277	3.58676	3.23441	3.74177	0.507363	0.000913718	0.0180798
361	sp|O60573|IF4E2_HUMAN	sp|O60573|IF4E2_HUMAN	6	sp|O60573|IF4E2_HUMAN Eukaryotic translation initiation factor 4E type 2 OS=Homo sapiens OX=9606 GN=EIF4E2 PE=1 SV=1	-1.03417	-0.528042	sp|O60573|IF4E2_HUMAN	0.50613	0.232289	0.77997	-0.781107	3.96301	0.00140735	0.0233318	0	86647000	43353000	45147000	52020000	106860000	86797000	45359000	136180000	127040000	130240000	132710000	101740000	89868000	116530000	-0.927956	-1.05144	-1.11216	-0.540835	-1.2428	-0.878077	-1.48594	-0.516863	-0.592346	-0.54624	-0.273041	-0.541668	-0.62296	-0.603174	-1.03417	-0.528042	0.50613	0.00140735	0.0233318
102	sp|O00148|DX39A_HUMAN	sp|O00148|DX39A_HUMAN	26	sp|O00148|DX39A_HUMAN ATP-dependent RNA helicase DDX39A OS=Homo sapiens OX=9606 GN=DDX39A PE=1 SV=2	2.51512	3.01939	sp|O00148|DX39A_HUMAN	0.504272	0.295188	0.713356	2.76726	5.17135	0.000140461	0.00549906	0	880390000	608180000	623730000	387720000	1192400000	1041400000	766350000	1465000000	1725900000	1620200000	1335500000	1041100000	1125400000	1356900000	2.41768	2.71711	2.59028	2.36858	2.26103	2.69879	2.55239	2.92961	3.19858	3.17669	3.05311	2.83957	3.00531	2.9329	2.51512	3.01939	0.504272	0.000140461	0.00549906
3099	sp|Q8WXX5|DNJC9_HUMAN	sp|Q8WXX5|DNJC9_HUMAN	13	sp|Q8WXX5|DNJC9_HUMAN DnaJ homolog subfamily C member 9 OS=Homo sapiens OX=9606 GN=DNAJC9 PE=1 SV=1	1.61747	2.12114	sp|Q8WXX5|DNJC9_HUMAN	0.503668	0.265872	0.741465	1.86931	4.5415	0.000457697	0.011883	0	562940000	273090000	271330000	184710000	792450000	565460000	445300000	716910000	703060000	809580000	792970000	729150000	631820000	765780000	1.77238	1.57465	1.4166	1.29457	1.66753	1.8197	1.77689	1.89281	1.89368	2.1521	2.30217	2.32175	2.17662	2.10886	1.61747	2.12114	0.503668	0.000457697	0.011883
4306	sp|Q9UJX3|APC7_HUMAN	sp|Q9UJX3|APC7_HUMAN	9	sp|Q9UJX3|APC7_HUMAN Anaphase-promoting complex subunit 7 OS=Homo sapiens OX=9606 GN=ANAPC7 PE=1 SV=4	-0.516534	-0.013174	sp|Q9UJX3|APC7_HUMAN	0.50336	0.232282	0.774438	-0.264854	3.98148	0.00135716	0.0230252	0	117870000	58387000	53864000	42692000	206360000	155800000	90954000	197650000	196060000	186670000	146270000	166000000	120830000	179790000	-0.483886	-0.626628	-0.863234	-0.827071	-0.286881	-0.0359513	-0.492086	0.0235742	0.0381446	-0.0146419	-0.13289	0.170119	-0.197995	0.021471	-0.516534	-0.013174	0.50336	0.00135716	0.0230252
2218	sp|Q15629|TRAM1_HUMAN	sp|Q15629|TRAM1_HUMAN	7	sp|Q15629|TRAM1_HUMAN Translocating chain-associated membrane protein 1 OS=Homo sapiens OX=9606 GN=TRAM1 PE=1 SV=3	-0.464992	0.0376079	sp|Q15629|TRAM1_HUMAN	0.5026	0.239006	0.766193	-0.213692	4.08836	0.0011005	0.0199619	0	130380000	53458000	59077000	49098000	221790000	150010000	88325000	229610000	185620000	211490000	164160000	142220000	120460000	192200000	-0.338329	-0.752475	-0.732977	-0.624569	-0.18214	-0.0904679	-0.533984	0.241021	-0.0413632	0.169716	0.0333349	-0.054674	-0.202397	0.117618	-0.464992	0.0376079	0.5026	0.0011005	0.0199619
1384	sp|P50148|GNAQ_HUMAN	sp|P50148|GNAQ_HUMAN	10	sp|P50148|GNAQ_HUMAN Guanine nucleotide-binding protein G(q) subunit alpha OS=Homo sapiens OX=9606 GN=GNAQ PE=1 SV=4	0.345386	0.845644	sp|P50148|GNAQ_HUMAN	0.500258	0.262549	0.737967	0.595515	4.51242	0.000483902	0.0122885	0	161440000	129080000	121560000	103290000	327070000	194260000	187520000	324950000	294840000	414750000	287880000	277670000	224260000	337580000	-0.0299872	0.505379	0.284451	0.452668	0.382091	0.281644	0.541456	0.744854	0.630993	1.16435	0.842513	0.918077	0.689741	0.928984	0.345386	0.845644	0.500258	0.000483902	0.0122885
3919	sp|Q9NP61|ARFG3_HUMAN	sp|Q9NP61|ARFG3_HUMAN	14	sp|Q9NP61|ARFG3_HUMAN ADP-ribosylation factor GTPase-activating protein 3 OS=Homo sapiens OX=9606 GN=ARFGAP3 PE=1 SV=1	-0.174347	0.321044	sp|Q9NP61|ARFG3_HUMAN	0.495391	0.188072	0.80271	0.0733486	3.45637	0.00384018	0.0413788	0	208700000	90550000	94248000	61417000	168870000	132210000	101500000	260940000	272500000	289210000	200600000	175830000	149180000	176130000	0.340525	-0.000496205	-0.0743706	-0.300309	-0.578106	-0.272295	-0.335376	0.426585	0.516504	0.631922	0.32213	0.253762	0.104561	-0.0081553	-0.174347	0.321044	0.495391	0.00384018	0.0413788
4284	sp|Q9UIC8|LCMT1_HUMAN	sp|Q9UIC8|LCMT1_HUMAN	8	sp|Q9UIC8|LCMT1_HUMAN Leucine carboxyl methyltransferase 1 OS=Homo sapiens OX=9606 GN=LCMT1 PE=1 SV=2	-0.987804	-0.492488	sp|Q9UIC8|LCMT1_HUMAN	0.495316	0.220265	0.770368	-0.740146	3.86126	0.00171979	0.0264039	0	99311000	44872000	41909000	34867000	134570000	87172000	60945000	121980000	175090000	164840000	101220000	88464000	81824000	145790000	-0.73111	-1.0023	-1.2171	-1.12034	-0.907898	-0.871871	-1.06402	-0.676622	-0.126221	-0.198308	-0.663252	-0.744961	-0.757568	-0.280483	-0.987804	-0.492488	0.495316	0.00171979	0.0264039
4022	sp|Q9NV31|IMP3_HUMAN	sp|Q9NV31|IMP3_HUMAN	10	sp|Q9NV31|IMP3_HUMAN U3 small nucleolar ribonucleoprotein protein IMP3 OS=Homo sapiens OX=9606 GN=IMP3 PE=1 SV=1	-0.320602	0.168152	sp|Q9NV31|IMP3_HUMAN	0.488754	0.18268	0.794829	-0.0762246	3.42392	0.00409646	0.043345	0	147160000	68839000	79242000	41643000	244590000	173160000	85343000	242500000	218080000	247920000	170210000	168220000	143460000	169460000	-0.163628	-0.391652	-0.318902	-0.863106	-0.0400052	0.116125	-0.583044	0.32026	0.192805	0.404424	0.0854716	0.189434	0.0484375	-0.0637652	-0.320602	0.168152	0.488754	0.00409646	0.043345
456	sp|O75663|TIPRL_HUMAN	sp|O75663|TIPRL_HUMAN	8	sp|O75663|TIPRL_HUMAN TIP41-like protein OS=Homo sapiens OX=9606 GN=TIPRL PE=1 SV=2	-0.370966	0.115328	sp|O75663|TIPRL_HUMAN	0.486295	0.267169	0.70542	-0.127819	4.75847	0.000303035	0.00879639	0	112690000	83312000	81771000	52561000	158540000	136900000	108790000	223220000	208430000	196100000	176350000	180480000	140750000	173810000	-0.548737	-0.11937	-0.274604	-0.525849	-0.669794	-0.222115	-0.236296	0.200074	0.127044	0.0581389	0.136523	0.291713	0.0210614	-0.0272553	-0.370966	0.115328	0.486295	0.000303035	0.00879639
307	sp|O43707|ACTN4_HUMAN	sp|O43707|ACTN4_HUMAN	63	sp|O43707|ACTN4_HUMAN Alpha-actinin-4 OS=Homo sapiens OX=9606 GN=ACTN4 PE=1 SV=2	6.40834	6.89183	sp|O43707|ACTN4_HUMAN	0.483491	0.299744	0.667239	6.65008	5.64193	6.00856e-05	0.00320775	0	13087000000	8323300000	8170500000	6217400000	25669000000	13811000000	10948000000	22746000000	22854000000	21590000000	18313000000	17003000000	16260000000	20113000000	6.31237	6.45034	6.21767	6.38775	6.71934	6.41983	6.35107	6.90837	6.95227	7.00116	6.825	6.9005	6.83887	6.81664	6.40834	6.89183	0.483491	6.00856e-05	0.00320775
1271	sp|P45985|MP2K4_HUMAN	sp|P45985|MP2K4_HUMAN	7	sp|P45985|MP2K4_HUMAN Dual specificity mitogen-activated protein kinase kinase 4 OS=Homo sapiens OX=9606 GN=MAP2K4 PE=1 SV=1	-0.423077	0.0572232	sp|P45985|MP2K4_HUMAN	0.4803	0.210424	0.750176	-0.182927	3.816	0.00188062	0.0277395	0	114330000	79040000	84490000	58647000	121420000	123330000	110510000	215890000	204670000	211840000	157580000	150630000	137400000	175470000	-0.527888	-0.194479	-0.228481	-0.367155	-1.05726	-0.372383	-0.213889	0.151635	0.100593	0.172158	-0.0255969	0.0288552	-0.0135179	-0.0135632	-0.423077	0.0572232	0.4803	0.00188062	0.0277395
3315	sp|Q96H79|ZCCHL_HUMAN	sp|Q96H79|ZCCHL_HUMAN	8	sp|Q96H79|ZCCHL_HUMAN Zinc finger CCCH-type antiviral protein 1-like OS=Homo sapiens OX=9606 GN=ZC3HAV1L PE=1 SV=2	0.400365	0.880467	sp|Q96H79|ZCCHL_HUMAN	0.480101	0.244377	0.715825	0.640416	4.36706	0.000640034	0.014526	0	193700000	119450000	109220000	92416000	371400000	289910000	161170000	357610000	371360000	347020000	310290000	259170000	225000000	342390000	0.232895	0.394746	0.133516	0.291543	0.566717	0.857992	0.325149	0.883795	0.966261	0.90104	0.950505	0.817832	0.69447	0.949364	0.400365	0.880467	0.480101	0.000640034	0.014526
2601	sp|Q6ZS17|RIPR1_HUMAN	sp|Q6ZS17|RIPR1_HUMAN	12	sp|Q6ZS17|RIPR1_HUMAN Rho family-interacting cell polarization regulator 1 OS=Homo sapiens OX=9606 GN=RIPOR1 PE=1 SV=1	0.473057	0.951913	sp|Q6ZS17|RIPR1_HUMAN	0.478857	0.202102	0.755612	0.712485	3.70997	0.00231984	0.0307004	0	184790000	120930000	122420000	97948000	468880000	289240000	158810000	372450000	387340000	389330000	249800000	289550000	265880000	372550000	0.164943	0.412317	0.294391	0.37575	0.905257	0.854661	0.304078	0.942783	1.02748	1.07094	0.638119	0.978989	0.934117	1.07097	0.473057	0.951913	0.478857	0.00231984	0.0307004
3404	sp|Q96QK1|VPS35_HUMAN	sp|Q96QK1|VPS35_HUMAN	18	sp|Q96QK1|VPS35_HUMAN Vacuolar protein sorting-associated protein 35 OS=Homo sapiens OX=9606 GN=VPS35 PE=1 SV=2	2.04812	2.52669	sp|Q96QK1|VPS35_HUMAN	0.478568	0.211801	0.745336	2.28741	3.84656	0.00177045	0.026627	0	798240000	418100000	444930000	230360000	788390000	738160000	636100000	1156400000	1116400000	1019400000	1079800000	790080000	742240000	969860000	2.27633	2.18239	2.11397	1.61447	1.66007	2.20336	2.28629	2.58644	2.56559	2.49243	2.74695	2.43843	2.40783	2.44918	2.04812	2.52669	0.478568	0.00177045	0.026627
2012	sp|Q13619|CUL4A_HUMAN	sp|Q13619|CUL4A_HUMAN	18	sp|Q13619|CUL4A_HUMAN Cullin-4A OS=Homo sapiens OX=9606 GN=CUL4A PE=1 SV=3	0.88032	1.35808	sp|Q13619|CUL4A_HUMAN	0.477759	0.306626	0.648892	1.1192	5.98598	3.292e-05	0.00214803	0	305090000	151170000	178590000	143320000	438050000	304130000	268770000	464190000	443420000	455840000	427470000	374390000	378900000	505050000	0.888447	0.730789	0.826866	0.927089	0.806464	0.926924	1.05566	1.26223	1.22395	1.30385	1.41203	1.3526	1.44261	1.50928	0.88032	1.35808	0.477759	3.292e-05	0.00214803
1578	sp|P61019|RAB2A_HUMAN	sp|P61019|RAB2A_HUMAN	18	sp|P61019|RAB2A_HUMAN Ras-related protein Rab-2A OS=Homo sapiens OX=9606 GN=RAB2A PE=1 SV=1	3.38244	3.86016	sp|P61019|RAB2A_HUMAN	0.477722	0.223986	0.731458	3.6213	4.03695	0.0012171	0.0211551	0	1556400000	964460000	970690000	716200000	3198900000	1644800000	1529600000	3196700000	2456800000	3204200000	2180000000	2275900000	1596900000	2513400000	3.23986	3.37505	3.21392	3.25746	3.69445	3.35673	3.53963	4.06159	3.71165	4.18375	3.75903	3.97667	3.50762	3.82085	3.38244	3.86016	0.477722	0.0012171	0.0211551
3039	sp|Q8TF05|PP4R1_HUMAN	sp|Q8TF05|PP4R1_HUMAN	11	sp|Q8TF05|PP4R1_HUMAN Serine/threonine-protein phosphatase 4 regulatory subunit 1 OS=Homo sapiens OX=9606 GN=PPP4R1 PE=1 SV=1	-0.243599	0.231093	sp|Q8TF05|PP4R1_HUMAN	0.474691	0.179349	0.770033	-0.00625312	3.44625	0.00391833	0.0419324	0	137980000	100210000	97072000	66093000	145840000	160250000	85555000	220820000	228180000	238390000	198830000	165650000	173870000	180520000	-0.256575	0.144142	-0.0327419	-0.194028	-0.791076	0.00458864	-0.5795	0.184391	0.258588	0.346535	0.309363	0.16705	0.324412	0.0273079	-0.243599	0.231093	0.474691	0.00391833	0.0419324
235	sp|O15305|PMM2_HUMAN	sp|O15305|PMM2_HUMAN	11	sp|O15305|PMM2_HUMAN Phosphomannomutase 2 OS=Homo sapiens OX=9606 GN=PMM2 PE=1 SV=1	0.876069	1.34992	sp|O15305|PMM2_HUMAN	0.473854	0.263754	0.683955	1.113	4.83592	0.00026191	0.00825808	0	287870000	149170000	174030000	130910000	502130000	349430000	240720000	570010000	527270000	516260000	346140000	367180000	322480000	431490000	0.804611	0.711785	0.790396	0.795904	1.00477	1.1268	0.898215	1.56016	1.4756	1.48767	1.10801	1.32433	1.21116	1.28254	0.876069	1.34992	0.473854	0.00026191	0.00825808
3787	sp|Q9H3P7|GCP60_HUMAN	sp|Q9H3P7|GCP60_HUMAN	13	sp|Q9H3P7|GCP60_HUMAN Golgi resident protein GCP60 OS=Homo sapiens OX=9606 GN=ACBD3 PE=1 SV=4	1.22027	1.6935	sp|Q9H3P7|GCP60_HUMAN	0.473229	0.189947	0.756511	1.45688	3.58189	0.00299148	0.0354004	0	466020000	189530000	168880000	159130000	572490000	481570000	336850000	568980000	559200000	667640000	514110000	441230000	428900000	699580000	1.49973	1.05347	0.748039	1.07866	1.19525	1.58853	1.37818	1.55753	1.56103	1.86742	1.6779	1.59143	1.62054	1.97862	1.22027	1.6935	0.473229	0.00299148	0.0354004
3493	sp|Q99797|MIPEP_HUMAN	sp|Q99797|MIPEP_HUMAN	18	sp|Q99797|MIPEP_HUMAN Mitochondrial intermediate peptidase OS=Homo sapiens OX=9606 GN=MIPEP PE=1 SV=2	1.01394	1.48525	sp|Q99797|MIPEP_HUMAN	0.471315	0.16805	0.774581	1.2496	3.33234	0.00491642	0.0488316	0	309320000	182670000	166380000	221670000	453710000	392980000	216880000	633240000	454510000	493160000	484830000	349990000	462550000	477040000	0.908316	1.00086	0.72701	1.55877	0.857485	1.29588	0.749239	1.71277	1.25984	1.42007	1.59342	1.25462	1.72896	1.42709	1.01394	1.48525	0.471315	0.00491642	0.0488316
3196	sp|Q969U7|PSMG2_HUMAN	sp|Q969U7|PSMG2_HUMAN	9	sp|Q969U7|PSMG2_HUMAN Proteasome assembly chaperone 2 OS=Homo sapiens OX=9606 GN=PSMG2 PE=1 SV=1	1.20548	1.67262	sp|Q969U7|PSMG2_HUMAN	0.467146	0.225699	0.708592	1.43905	4.14851	0.000978425	0.0185166	0	324690000	216660000	258440000	162790000	601770000	387410000	300080000	676770000	672180000	632790000	454010000	464790000	323410000	663020000	0.978294	1.24436	1.34797	1.11159	1.26771	1.27533	1.21307	1.80922	1.82841	1.78824	1.49881	1.66706	1.21529	1.9013	1.20548	1.67262	0.467146	0.000978425	0.0185166
1098	sp|P30566|PUR8_HUMAN	sp|P30566|PUR8_HUMAN	16	sp|P30566|PUR8_HUMAN Adenylosuccinate lyase OS=Homo sapiens OX=9606 GN=ADSL PE=1 SV=2	2.14573	2.61183	sp|P30566|PUR8_HUMAN	0.466095	0.258199	0.673991	2.37878	4.80717	0.000276456	0.00860126	0	706650000	422560000	419490000	347030000	1061400000	864580000	506300000	1078200000	1098700000	1216800000	1004000000	993090000	921920000	917780000	2.10047	2.19753	2.03095	2.20799	2.09198	2.43093	1.96027	2.48486	2.54236	2.75384	2.64209	2.77092	2.71902	2.36968	2.14573	2.61183	0.466095	0.000276456	0.00860126
878	sp|P16435|NCPR_HUMAN	sp|P16435|NCPR_HUMAN	13	sp|P16435|NCPR_HUMAN NADPH--cytochrome P450 reductase OS=Homo sapiens OX=9606 GN=POR PE=1 SV=2	1.86296	2.32633	sp|P16435|NCPR_HUMAN	0.463368	0.193613	0.733123	2.09465	3.68313	0.00244666	0.031929	0	602610000	285620000	338390000	229720000	937150000	739930000	548650000	1006100000	1046400000	1074500000	813770000	586970000	571680000	990350000	1.87065	1.63866	1.72802	1.61044	1.91114	2.20681	2.07502	2.38445	2.4715	2.57017	2.33947	2.00639	2.03303	2.4793	1.86296	2.32633	0.463368	0.00244666	0.031929
1041	sp|P27708|PYR1_HUMAN	sp|P27708|PYR1_HUMAN	67	sp|P27708|PYR1_HUMAN CAD protein OS=Homo sapiens OX=9606 GN=CAD PE=1 SV=3	3.93349	4.3947	sp|P27708|PYR1_HUMAN	0.461211	0.288578	0.633845	4.16409	5.72843	5.15707e-05	0.00295462	0	2619800000	1478000000	1633800000	1001000000	3587500000	2566500000	2126600000	3667300000	4233200000	3556900000	3628900000	2959300000	3261800000	3450700000	3.99126	3.98415	3.94806	3.74239	3.86098	3.99721	4.01034	4.26083	4.50224	4.33797	4.49315	4.35843	4.53287	4.27739	3.93349	4.3947	0.461211	5.15707e-05	0.00295462
1299	sp|P47755|CAZA2_HUMAN	sp|P47755|CAZA2_HUMAN	12	sp|P47755|CAZA2_HUMAN F-actin-capping protein subunit alpha-2 OS=Homo sapiens OX=9606 GN=CAPZA2 PE=1 SV=3	1.99061	2.44974	sp|P47755|CAZA2_HUMAN	0.45913	0.281705	0.636555	2.22018	5.54858	7.09406e-05	0.0036624	0	602390000	385200000	403190000	337970000	896260000	637330000	526340000	956950000	1027500000	1073200000	856350000	871850000	804790000	877170000	1.87012	2.06544	1.97507	2.16967	1.84634	1.99193	2.01572	2.31179	2.44501	2.56839	2.41294	2.58162	2.52397	2.30448	1.99061	2.44974	0.45913	7.09406e-05	0.0036624
929	sp|P19525|E2AK2_HUMAN	sp|P19525|E2AK2_HUMAN	17	sp|P19525|E2AK2_HUMAN Interferon-induced, double-stranded RNA-activated protein kinase OS=Homo sapiens OX=9606 GN=EIF2AK2 PE=1 SV=2	1.75501	2.21343	sp|P19525|E2AK2_HUMAN	0.458425	0.239975	0.676876	1.98422	4.49962	0.000495922	0.0124591	0	486310000	296890000	299610000	299990000	1012200000	564050000	403870000	790070000	828370000	947590000	824760000	666580000	667550000	781430000	1.56123	1.69388	1.5564	1.99701	2.02304	1.8161	1.63739	2.03378	2.132	2.38455	2.3588	2.19131	2.25558	2.138	1.75501	2.21343	0.458425	0.000495922	0.0124591
4092	sp|Q9NXF1|TEX10_HUMAN	sp|Q9NXF1|TEX10_HUMAN	17	sp|Q9NXF1|TEX10_HUMAN Testis-expressed protein 10 OS=Homo sapiens OX=9606 GN=TEX10 PE=1 SV=2	1.30413	1.75987	sp|Q9NXF1|TEX10_HUMAN	0.455742	0.18189	0.729595	1.532	3.56832	0.00307333	0.0361868	0	524830000	198840000	262060000	135180000	568720000	448290000	355390000	682300000	803720000	580620000	553150000	446060000	431980000	587620000	1.67123	1.12189	1.36758	0.842395	1.18566	1.48544	1.45472	1.82102	2.0881	1.66118	1.78334	1.60726	1.63081	1.7274	1.30413	1.75987	0.455742	0.00307333	0.0361868
3213	sp|Q96AG4|LRC59_HUMAN	sp|Q96AG4|LRC59_HUMAN	18	sp|Q96AG4|LRC59_HUMAN Leucine-rich repeat-containing protein 59 OS=Homo sapiens OX=9606 GN=LRRC59 PE=1 SV=1	4.93774	5.38388	sp|Q96AG4|LRC59_HUMAN	0.446131	0.246475	0.645787	5.16081	4.79116	0.000284916	0.00867902	0	4578800000	2937700000	3589100000	2087700000	7770400000	5208500000	4072500000	6896800000	8058500000	8684100000	7221300000	5920100000	5997400000	6359400000	4.79695	4.96434	5.05774	4.80708	4.98361	5.01604	4.93846	5.17713	5.43764	5.65617	5.48443	5.36657	5.40714	5.15803	4.93774	5.38388	0.446131	0.000284916	0.00867902
950	sp|P20839|IMDH1_HUMAN	sp|P20839|IMDH1_HUMAN	24	sp|P20839|IMDH1_HUMAN Inosine-5-monophosphate dehydrogenase 1 OS=Homo sapiens OX=9606 GN=IMPDH1 PE=1 SV=2	2.83742	3.28348	sp|P20839|IMDH1_HUMAN	0.446056	0.167693	0.72442	3.06045	3.43588	0.0040001	0.0427102	0	1161400000	648900000	745020000	419930000	1809700000	1583000000	874720000	1379700000	1979100000	1956500000	1638800000	1499500000	1517100000	1563500000	2.81742	2.80959	2.84083	2.48417	2.86702	3.3016	2.74132	2.84258	3.39748	3.45523	3.34794	3.37003	3.43403	3.13705	2.83742	3.28348	0.446056	0.0040001	0.0427102
1467	sp|P52943|CRIP2_HUMAN	sp|P52943|CRIP2_HUMAN	2	sp|P52943|CRIP2_HUMAN Cysteine-rich protein 2 OS=Homo sapiens OX=9606 GN=CRIP2 PE=1 SV=1	-2.14164	-1.70378	sp|P52943|CRIP2_HUMAN	0.437862	0.161132	0.714591	-1.92271	3.39267	0.00435956	0.0451128	0	50432000	16722000	20453000	13732000	63851000	37100000	29911000	58385000	52110000	56725000	50449000	61074000	39980000	51325000	-1.70893	-2.41076	-2.22861	-2.47001	-1.99082	-2.10161	-2.08072	-1.74554	-1.88719	-1.77371	-1.66638	-1.28365	-1.78565	-1.78432	-2.14164	-1.70378	0.437862	0.00435956	0.0451128
2983	sp|Q8NI36|WDR36_HUMAN	sp|Q8NI36|WDR36_HUMAN	31	sp|Q8NI36|WDR36_HUMAN WD repeat-containing protein 36 OS=Homo sapiens OX=9606 GN=WDR36 PE=1 SV=1	2.48191	2.90723	sp|Q8NI36|WDR36_HUMAN	0.425324	0.18542	0.665229	2.69457	3.80139	0.00193573	0.0280681	0	1142100000	506520000	615280000	357650000	1056700000	1044800000	745140000	1319800000	1633800000	1343700000	1166400000	1068800000	1065200000	1318000000	2.79324	2.45612	2.57105	2.25165	2.08553	2.70348	2.51229	2.77819	3.11889	2.90035	2.85808	2.87774	2.92639	2.891	2.48191	2.90723	0.425324	0.00193573	0.0280681
3617	sp|Q9BVI4|NOC4L_HUMAN	sp|Q9BVI4|NOC4L_HUMAN	15	sp|Q9BVI4|NOC4L_HUMAN Nucleolar complex protein 4 homolog OS=Homo sapiens OX=9606 GN=NOC4L PE=1 SV=1	1.79015	2.21036	sp|Q9BVI4|NOC4L_HUMAN	0.420208	0.21661	0.623806	2.00026	4.42539	0.000571941	0.0137091	0	652760000	296910000	354220000	227820000	858070000	650790000	408910000	901920000	937280000	958930000	719000000	701990000	579550000	736520000	1.986	1.69397	1.79249	1.59841	1.78309	2.02202	1.6551	2.22587	2.31148	2.40212	2.1611	2.26656	2.05266	2.05274	1.79015	2.21036	0.420208	0.000571941	0.0137091
727	sp|P08240|SRPRA_HUMAN	sp|P08240|SRPRA_HUMAN	19	sp|P08240|SRPRA_HUMAN Signal recognition particle receptor subunit alpha OS=Homo sapiens OX=9606 GN=SRPRA PE=1 SV=2	1.68982	2.10889	sp|P08240|SRPRA_HUMAN	0.419071	0.177498	0.660645	1.89935	3.71963	0.00227587	0.0304616	0	394590000	318020000	327900000	246680000	919810000	566790000	414000000	718420000	1011300000	736600000	626480000	676350000	596570000	794840000	1.25965	1.79198	1.68362	1.71361	1.88401	1.82308	1.67278	1.89586	2.42192	2.01258	1.96267	2.21246	2.09421	2.16251	1.68982	2.10889	0.419071	0.00227587	0.0304616
370	sp|O60716|CTND1_HUMAN	sp|O60716|CTND1_HUMAN	27	sp|O60716|CTND1_HUMAN Catenin delta-1 OS=Homo sapiens OX=9606 GN=CTNND1 PE=1 SV=1	1.65934	2.07761	sp|O60716|CTND1_HUMAN	0.418268	0.19705	0.639486	1.86847	4.0541	0.00117686	0.0206505	0	402030000	311070000	331620000	272890000	906290000	515890000	356410000	717820000	800850000	761530000	710180000	585960000	646320000	786640000	1.2866	1.76045	1.69953	1.85987	1.8625	1.68763	1.45881	1.89465	2.08291	2.06174	2.14332	2.00389	2.20919	2.14757	1.65934	2.07761	0.418268	0.00117686	0.0206505
659	sp|P04899|GNAI2_HUMAN	sp|P04899|GNAI2_HUMAN	20	sp|P04899|GNAI2_HUMAN Guanine nucleotide-binding protein G(i) subunit alpha-2 OS=Homo sapiens OX=9606 GN=GNAI2 PE=1 SV=3	2.89987	3.31434	sp|P04899|GNAI2_HUMAN	0.414476	0.178781	0.65017	3.10711	3.7706	0.00205734	0.0296484	0	1134900000	770040000	694970000	567250000	1642900000	1465200000	965110000	2071400000	1790200000	2152900000	1606600000	1391600000	1087900000	1854100000	2.78411	3.05382	2.74278	2.91974	2.72656	3.19028	2.8818	3.43211	3.25173	3.5965	3.31935	3.26146	2.95666	3.38261	2.89987	3.31434	0.414476	0.00205734	0.0296484
372	sp|O60749|SNX2_HUMAN	sp|O60749|SNX2_HUMAN	20	sp|O60749|SNX2_HUMAN Sorting nexin-2 OS=Homo sapiens OX=9606 GN=SNX2 PE=1 SV=2	2.45554	2.86643	sp|O60749|SNX2_HUMAN	0.410893	0.197863	0.623923	2.66099	4.13569	0.00100322	0.0188036	0	1047400000	477640000	495070000	394260000	1184800000	1100100000	719000000	1340500000	1393500000	1365500000	1034300000	1083400000	1016300000	1432600000	2.66833	2.37236	2.26454	2.39281	2.25174	2.77773	2.46128	2.80076	2.88773	2.92411	2.68493	2.89747	2.85893	3.0111	2.45554	2.86643	0.410893	0.00100322	0.0188036
2123	sp|Q14919|NC2A_HUMAN	sp|Q14919|NC2A_HUMAN	7	sp|Q14919|NC2A_HUMAN Dr1-associated corepressor OS=Homo sapiens OX=9606 GN=DRAP1 PE=1 SV=3	0.352387	0.762808	sp|Q14919|NC2A_HUMAN	0.410421	0.155367	0.665475	0.557598	3.45031	0.0038868	0.0417854	0	148100000	118940000	148730000	86699000	366580000	223120000	174150000	274150000	334400000	313790000	263580000	261490000	271920000	300730000	-0.15444	0.388641	0.568887	0.199049	0.547742	0.481036	0.435795	0.49823	0.813935	0.752387	0.715473	0.830789	0.966362	0.762481	0.352387	0.762808	0.410421	0.0038868	0.0417854
4548	sp|Q9Y4R8|TELO2_HUMAN	sp|Q9Y4R8|TELO2_HUMAN	17	sp|Q9Y4R8|TELO2_HUMAN Telomere length regulation protein TEL2 homolog OS=Homo sapiens OX=9606 GN=TELO2 PE=1 SV=2	0.820551	1.22929	sp|Q9Y4R8|TELO2_HUMAN	0.408744	0.168652	0.648836	1.02492	3.65034	0.00261116	0.0330496	0	222580000	171560000	194400000	127970000	387690000	362420000	237870000	470530000	444320000	460730000	384780000	329270000	277660000	453420000	0.433438	0.91133	0.946472	0.763004	0.629069	1.17934	0.881201	1.28191	1.22689	1.31961	1.26047	1.16589	0.996348	1.35395	0.820551	1.22929	0.408744	0.00261116	0.0330496
4567	sp|Q9Y5J1|UTP18_HUMAN	sp|Q9Y5J1|UTP18_HUMAN	18	sp|Q9Y5J1|UTP18_HUMAN U3 small nucleolar RNA-associated protein 18 homolog OS=Homo sapiens OX=9606 GN=UTP18 PE=1 SV=3	2.26254	2.66855	sp|Q9Y5J1|UTP18_HUMAN	0.406017	0.199698	0.612336	2.46555	4.21954	0.000851935	0.0173264	0	828230000	506720000	494380000	348160000	1114700000	744050000	598100000	1173700000	1319200000	1452600000	926890000	855440000	897750000	995310000	2.32955	2.45669	2.26257	2.2127	2.16315	2.2148	2.1983	2.60799	2.80812	3.01543	2.52697	2.55399	2.68088	2.48649	2.26254	2.66855	0.406017	0.000851935	0.0173264
1430	sp|P51617|IRAK1_HUMAN	sp|P51617|IRAK1_HUMAN	5	sp|P51617|IRAK1_HUMAN Interleukin-1 receptor-associated kinase 1 OS=Homo sapiens OX=9606 GN=IRAK1 PE=1 SV=2	-1.61927	-1.21358	sp|P51617|IRAK1_HUMAN	0.405684	0.163981	0.647388	-1.41643	3.59887	0.00289226	0.0348575	0	55537000	27810000	27774000	23570000	80658000	57109000	46081000	109040000	96412000	77380000	60281000	50842000	59398000	78624000	-1.56979	-1.68495	-1.79718	-1.6875	-1.65141	-1.48068	-1.46338	-0.839313	-0.993192	-1.31514	-1.40988	-1.55024	-1.21737	-1.16996	-1.61927	-1.21358	0.405684	0.00289226	0.0348575
1756	sp|Q00341|VIGLN_HUMAN	sp|Q00341|VIGLN_HUMAN	39	sp|Q00341|VIGLN_HUMAN Vigilin OS=Homo sapiens OX=9606 GN=HDLBP PE=1 SV=2	2.93287	3.33121	sp|Q00341|VIGLN_HUMAN	0.398334	0.175543	0.621124	3.13204	3.83364	0.0018162	0.0270016	0	1366500000	724120000	868700000	526680000	1397300000	1325900000	1127900000	1731700000	2061200000	1751300000	1767500000	1401500000	1446500000	1755400000	3.05209	2.96608	3.05739	2.81225	2.49136	3.04647	3.10445	3.17225	3.45654	3.2916	3.45685	3.27176	3.36563	3.30381	2.93287	3.33121	0.398334	0.0018162	0.0270016
4260	sp|Q9UHD2|TBK1_HUMAN	sp|Q9UHD2|TBK1_HUMAN	16	sp|Q9UHD2|TBK1_HUMAN Serine/threonine-protein kinase TBK1 OS=Homo sapiens OX=9606 GN=TBK1 PE=1 SV=1	0.537069	0.93141	sp|Q9UHD2|TBK1_HUMAN	0.394341	0.147093	0.641589	0.73424	3.41979	0.00413029	0.0436047	0	272490000	111020000	142510000	90381000	327870000	302900000	205050000	332470000	392190000	372290000	263980000	278130000	278590000	367710000	0.72538	0.290315	0.508651	0.259292	0.385639	0.92109	0.669116	0.778045	1.04556	1.00485	0.717658	0.920484	1.00115	1.05213	0.537069	0.93141	0.394341	0.00413029	0.0436047
2353	sp|Q53GQ0|DHB12_HUMAN	sp|Q53GQ0|DHB12_HUMAN	14	sp|Q53GQ0|DHB12_HUMAN Very-long-chain 3-oxoacyl-CoA reductase OS=Homo sapiens OX=9606 GN=HSD17B12 PE=1 SV=2	2.58938	2.98124	sp|Q53GQ0|DHB12_HUMAN	0.391862	0.19094	0.592783	2.78531	4.18183	0.000916855	0.0180798	0	1057000000	538290000	555900000	487700000	1268000000	960800000	936810000	1521300000	1495800000	1593200000	1182600000	1226500000	982150000	1398300000	2.6815	2.54293	2.42794	2.70088	2.35032	2.58283	2.83928	2.98432	2.99067	3.15187	2.87795	3.07784	2.80987	2.97619	2.58938	2.98124	0.391862	0.000916855	0.0180798
3659	sp|Q9BY44|EIF2A_HUMAN	sp|Q9BY44|EIF2A_HUMAN	24	sp|Q9BY44|EIF2A_HUMAN Eukaryotic translation initiation factor 2A OS=Homo sapiens OX=9606 GN=EIF2A PE=1 SV=3	3.02169	3.41203	sp|Q9BY44|EIF2A_HUMAN	0.39034	0.182859	0.59782	3.21686	4.0339	0.0012244	0.0211551	0	1099800000	813820000	797080000	724530000	2138300000	1403200000	932460000	2231000000	2046900000	2020800000	1645200000	1540200000	1469100000	1684700000	2.73878	3.13272	2.93607	3.27421	3.10937	3.12804	2.83263	3.53979	3.44643	3.50298	3.35356	3.40897	3.38788	3.24459	3.02169	3.41203	0.39034	0.0012244	0.0211551
2929	sp|Q8NC51|PAIRB_HUMAN	sp|Q8NC51|PAIRB_HUMAN	28	sp|Q8NC51|PAIRB_HUMAN Plasminogen activator inhibitor 1 RNA-binding protein OS=Homo sapiens OX=9606 GN=SERBP1 PE=1 SV=2	4.68995	5.07672	sp|Q8NC51|PAIRB_HUMAN	0.386777	0.153641	0.619912	4.88334	3.55724	0.00314179	0.036535	0	5333400000	2638600000	2406100000	1995200000	5175800000	3993600000	3541800000	6625600000	6922400000	6628600000	4548800000	4858100000	4867000000	5462000000	5.01708	4.81112	4.49388	4.74144	4.3934	4.6337	4.73902	5.11893	5.21684	5.25729	4.81863	5.07913	5.10735	4.93891	4.68995	5.07672	0.386777	0.00314179	0.036535
288	sp|O43464|HTRA2_HUMAN	sp|O43464|HTRA2_HUMAN	6	sp|O43464|HTRA2_HUMAN Serine protease HTRA2, mitochondrial OS=Homo sapiens OX=9606 GN=HTRA2 PE=1 SV=2	-0.279653	0.105019	sp|O43464|HTRA2_HUMAN	0.384672	0.170938	0.598406	-0.087317	3.85902	0.0017274	0.0264343	0	145460000	63581000	92778000	60738000	187410000	133830000	113350000	207840000	200980000	197190000	186420000	194280000	143040000	158350000	-0.180395	-0.505026	-0.0965363	-0.316412	-0.426795	-0.254764	-0.177642	0.096505	0.0741572	0.0663248	0.21652	0.398838	0.0442288	-0.161442	-0.279653	0.105019	0.384672	0.0017274	0.0264343
4019	sp|Q9NUU7|DD19A_HUMAN	sp|Q9NUU7|DD19A_HUMAN	28	sp|Q9NUU7|DD19A_HUMAN ATP-dependent RNA helicase DDX19A OS=Homo sapiens OX=9606 GN=DDX19A PE=1 SV=1	3.14124	3.52513	sp|Q9NUU7|DD19A_HUMAN	0.383892	0.16489	0.602895	3.33318	3.75856	0.00210694	0.0297031	0	1624200000	841430000	932410000	588120000	1690800000	1626600000	1265300000	2236800000	2134700000	2383300000	1829900000	1613700000	1447900000	2050500000	3.30139	3.18033	3.15719	2.97207	2.7683	3.34071	3.26866	3.54356	3.50745	3.74665	3.50683	3.47675	3.36701	3.52764	3.14124	3.52513	0.383892	0.00210694	0.0297031
2031	sp|Q13867|BLMH_HUMAN	sp|Q13867|BLMH_HUMAN	15	sp|Q13867|BLMH_HUMAN Bleomycin hydrolase OS=Homo sapiens OX=9606 GN=BLMH PE=1 SV=1	1.76905	2.1516	sp|Q13867|BLMH_HUMAN	0.382556	0.164392	0.60072	1.96033	3.75986	0.00210152	0.0297031	0	503490000	347010000	282690000	244610000	876870000	719950000	421300000	795510000	829330000	857170000	708100000	648810000	635610000	799560000	1.61133	1.91646	1.47443	1.7014	1.81457	2.1674	1.69774	2.04374	2.13368	2.23645	2.1391	2.15202	2.1852	2.17104	1.76905	2.1516	0.382556	0.00210152	0.0297031
3124	sp|Q92599|SEPT8_HUMAN	sp|Q92599|SEPT8_HUMAN	12	sp|Q92599|SEPT8_HUMAN Septin-8 OS=Homo sapiens OX=9606 GN=SEPTIN8 PE=1 SV=4	0.389772	0.769729	sp|Q92599|SEPT8_HUMAN	0.379958	0.188587	0.571328	0.57975	4.25717	0.000791835	0.0164604	0	222170000	112050000	151450000	91868000	299870000	212410000	175960000	350940000	385350000	320880000	251870000	242850000	207760000	302920000	0.430778	0.303493	0.594441	0.282929	0.255973	0.410224	0.450564	0.856481	1.01999	0.785383	0.650007	0.723269	0.580037	0.772933	0.389772	0.769729	0.379958	0.000791835	0.0164604
564	sp|O95456|PSMG1_HUMAN	sp|O95456|PSMG1_HUMAN	14	sp|O95456|PSMG1_HUMAN Proteasome assembly chaperone 1 OS=Homo sapiens OX=9606 GN=PSMG1 PE=1 SV=1	1.48729	1.86192	sp|O95456|PSMG1_HUMAN	0.374637	0.159219	0.590054	1.67461	3.72898	0.00223407	0.0303372	0	389480000	239420000	254830000	199830000	731610000	559500000	419220000	627640000	728070000	626190000	607320000	511240000	549780000	669780000	1.24084	1.38689	1.32814	1.40853	1.55149	1.80444	1.69067	1.69988	1.94447	1.77276	1.91793	1.80555	1.97696	1.91592	1.48729	1.86192	0.374637	0.00223407	0.0303372
4537	sp|Q9Y4E8|UBP15_HUMAN	sp|Q9Y4E8|UBP15_HUMAN	19	sp|Q9Y4E8|UBP15_HUMAN Ubiquitin carboxyl-terminal hydrolase 15 OS=Homo sapiens OX=9606 GN=USP15 PE=1 SV=3	0.057664	0.432298	sp|Q9Y4E8|UBP15_HUMAN	0.374634	0.184362	0.564905	0.244981	4.22176	0.000848259	0.0173264	0	161640000	106830000	93921000	86655000	252090000	176690000	122080000	282730000	280770000	280750000	193730000	184920000	180570000	227020000	-0.0282006	0.235421	-0.0792713	0.198313	0.00386568	0.145175	-0.0716552	0.542938	0.559945	0.588078	0.27193	0.327048	0.378689	0.357458	0.057664	0.432298	0.374634	0.000848259	0.0173264
4569	sp|Q9Y5K6|CD2AP_HUMAN	sp|Q9Y5K6|CD2AP_HUMAN	18	sp|Q9Y5K6|CD2AP_HUMAN CD2-associated protein OS=Homo sapiens OX=9606 GN=CD2AP PE=1 SV=1	1.75411	2.12791	sp|Q9Y5K6|CD2AP_HUMAN	0.373794	0.160291	0.587297	1.94101	3.75395	0.00212628	0.0298187	0	611260000	308590000	294170000	219310000	757300000	681660000	476750000	815650000	902510000	835410000	686700000	616110000	627360000	721040000	1.89121	1.74903	1.53056	1.54327	1.60162	2.08873	1.87437	2.08001	2.25655	2.19848	2.09489	2.07683	2.16645	2.02214	1.75411	2.12791	0.373794	0.00212628	0.0298187
2247	sp|Q15907|RB11B_HUMAN;sp|P62491|RB11A_HUMAN	sp|Q15907|RB11B_HUMAN	13	sp|Q15907|RB11B_HUMAN Ras-related protein Rab-11B OS=Homo sapiens OX=9606 GN=RAB11B PE=1 SV=4;sp|P62491|RB11A_HUMAN Ras-related protein Rab-11A OS=Homo sapiens OX=9606 GN=RAB11A PE=1 SV=3	3.7093	4.07459	sp|Q15907|RB11B_HUMAN	0.365299	0.16525	0.565347	3.89195	3.91538	0.0015457	0.0242057	0	2220900000	1282200000	1481900000	910870000	2490900000	2433500000	1788400000	3286900000	3200900000	3162200000	2746500000	2350000000	2191000000	3015400000	3.7529	3.78137	3.81046	3.60572	3.33108	3.92061	3.76293	4.10195	4.09608	4.16426	4.0918	4.02325	3.96166	4.08316	3.7093	4.07459	0.365299	0.0015457	0.0242057
866	sp|P16070|CD44_HUMAN	sp|P16070|CD44_HUMAN	11	sp|P16070|CD44_HUMAN CD44 antigen OS=Homo sapiens OX=9606 GN=CD44 PE=1 SV=3	1.9989	2.36169	sp|P16070|CD44_HUMAN	0.362794	0.132429	0.59316	2.1803	3.37679	0.0044997	0.0460345	0	688660000	356200000	401970000	316840000	885260000	572100000	626000000	839150000	1188200000	983990000	716520000	721690000	680490000	1053400000	2.06326	1.95376	1.9708	2.07616	1.8284	1.8365	2.26342	2.12122	2.65615	2.44022	2.15613	2.3068	2.28314	2.5682	1.9989	2.36169	0.362794	0.0044997	0.0460345
1781	sp|Q01780|EXOSX_HUMAN	sp|Q01780|EXOSX_HUMAN	33	sp|Q01780|EXOSX_HUMAN Exosome component 10 OS=Homo sapiens OX=9606 GN=EXOSC10 PE=1 SV=2	2.40932	2.76886	sp|Q01780|EXOSX_HUMAN	0.35954	0.153959	0.565121	2.58909	3.74994	0.00214323	0.0299454	0	758850000	544320000	618080000	350260000	1402800000	942330000	621140000	1245100000	1417100000	1165600000	1155200000	866700000	1012800000	1250000000	2.20331	2.55882	2.57745	2.22141	2.49707	2.55489	2.25229	2.69366	2.91213	2.69036	2.84418	2.57301	2.85398	2.8147	2.40932	2.76886	0.35954	0.00214323	0.0299454
4021	sp|Q9NV06|DCA13_HUMAN	sp|Q9NV06|DCA13_HUMAN	18	sp|Q9NV06|DCA13_HUMAN DDB1- and CUL4-associated factor 13 OS=Homo sapiens OX=9606 GN=DCAF13 PE=1 SV=2	1.70888	2.06645	sp|Q9NV06|DCA13_HUMAN	0.357565	0.128298	0.586832	1.88766	3.34406	0.00480285	0.0482133	0	556080000	235620000	380790000	225820000	888410000	635050000	378040000	853230000	811890000	798490000	755200000	554290000	567490000	666020000	1.75469	1.36406	1.89447	1.58563	1.83356	1.98677	1.54298	2.14536	2.1028	2.13173	2.23187	1.9231	2.02247	1.90781	1.70888	2.06645	0.357565	0.00480285	0.0482133
909	sp|P18124|RL7_HUMAN	sp|P18124|RL7_HUMAN	25	sp|P18124|RL7_HUMAN 60S ribosomal protein L7 OS=Homo sapiens OX=9606 GN=RPL7 PE=1 SV=1	6.15791	6.50066	sp|P18124|RL7_HUMAN	0.34275	0.133373	0.552126	6.32929	3.51002	0.00345121	0.0390693	0	12594000000	6766800000	6699900000	5126200000	17191000000	12965000000	9722900000	17017000000	17575000000	19656000000	13964000000	12193000000	11136000000	15454000000	6.25696	6.15493	5.93786	6.10822	6.13702	6.32883	6.18155	6.48739	6.57063	6.86256	6.43442	6.41704	6.29551	6.43707	6.15791	6.50066	0.34275	0.00345121	0.0390693
845	sp|P14618|KPYM_HUMAN	sp|P14618|KPYM_HUMAN	48	sp|P14618|KPYM_HUMAN Pyruvate kinase PKM OS=Homo sapiens OX=9606 GN=PKM PE=1 SV=4	8.42217	8.76171	sp|P14618|KPYM_HUMAN	0.339539	0.162715	0.516364	8.59194	4.11726	0.00104001	0.0190115	0	48555000000	36903000000	41453000000	27200000000	76189000000	54201000000	47751000000	73836000000	80288000000	75141000000	68571000000	66303000000	61921000000	75927000000	8.20426	8.57532	8.50759	8.52545	8.29961	8.388	8.45498	8.61658	8.77797	8.84294	8.72694	8.87905	8.75834	8.73016	8.42217	8.76171	0.339539	0.00104001	0.0190115
813	sp|P12814|ACTN1_HUMAN	sp|P12814|ACTN1_HUMAN	62	sp|P12814|ACTN1_HUMAN Alpha-actinin-1 OS=Homo sapiens OX=9606 GN=ACTN1 PE=1 SV=2	5.29204	5.62964	sp|P12814|ACTN1_HUMAN	0.337602	0.135419	0.539784	5.46084	3.58032	0.00300087	0.0354223	0	6011000000	3319300000	4153000000	2639800000	12171000000	6744800000	5179800000	9086800000	10204000000	9131200000	7412200000	6706200000	6561400000	9350400000	5.18967	5.1386	5.2635	5.14695	5.63541	5.38813	5.28202	5.5772	5.78063	5.73032	5.52202	5.54785	5.53616	5.71331	5.29204	5.62964	0.337602	0.00300087	0.0354223
1959	sp|Q13310|PABP4_HUMAN	sp|Q13310|PABP4_HUMAN	37	sp|Q13310|PABP4_HUMAN Polyadenylate-binding protein 4 OS=Homo sapiens OX=9606 GN=PABPC4 PE=1 SV=1	3.56662	3.90319	sp|Q13310|PABP4_HUMAN	0.336573	0.152721	0.520425	3.73491	3.92528	0.00151584	0.0238973	0	1829000000	1176900000	1140400000	802210000	3149600000	2120000000	1570900000	2635700000	2843900000	3008500000	2308400000	2317700000	1893300000	2709700000	3.47275	3.6591	3.44111	3.42172	3.67189	3.72208	3.57769	3.78163	3.92425	4.09068	3.84147	4.00313	3.75202	3.92918	3.56662	3.90319	0.336573	0.00151584	0.0238973
2009	sp|Q13616|CUL1_HUMAN	sp|Q13616|CUL1_HUMAN	35	sp|Q13616|CUL1_HUMAN Cullin-1 OS=Homo sapiens OX=9606 GN=CUL1 PE=1 SV=2	3.07544	3.41175	sp|Q13616|CUL1_HUMAN	0.336305	0.128599	0.544012	3.2436	3.47171	0.00372462	0.0407885	0	1386700000	850860000	777790000	610960000	1769500000	1644900000	1155200000	2120800000	2210700000	1895900000	1636700000	1348200000	1426500000	2070700000	3.07326	3.19623	2.90153	3.02726	2.83439	3.35682	3.13862	3.4663	3.55829	3.40876	3.34609	3.21539	3.34564	3.54176	3.07544	3.41175	0.336305	0.00372462	0.0407885
3717	sp|Q9GZR2|REXO4_HUMAN	sp|Q9GZR2|REXO4_HUMAN	14	sp|Q9GZR2|REXO4_HUMAN RNA exonuclease 4 OS=Homo sapiens OX=9606 GN=REXO4 PE=1 SV=2	0.742917	1.07689	sp|Q9GZR2|REXO4_HUMAN	0.333977	0.128053	0.5399	0.909905	3.47753	0.00368172	0.0405076	0	254750000	171330000	159310000	123820000	466820000	277330000	193830000	338120000	430910000	459540000	351080000	311870000	298530000	335910000	0.628238	0.909416	0.665784	0.715254	0.898861	0.794131	0.588733	0.802492	1.18236	1.31579	1.12843	1.08695	1.10038	0.921841	0.742917	1.07689	0.333977	0.00368172	0.0405076
399	sp|O75131|CPNE3_HUMAN	sp|O75131|CPNE3_HUMAN	29	sp|O75131|CPNE3_HUMAN Copine-3 OS=Homo sapiens OX=9606 GN=CPNE3 PE=1 SV=1	4.88081	5.20821	sp|O75131|CPNE3_HUMAN	0.327394	0.13981	0.514979	5.04451	3.74227	0.00217604	0.0300071	0	5018200000	2939500000	2847100000	2033100000	7184100000	5025700000	4068800000	7308900000	7403900000	7124100000	5479700000	5201300000	4329500000	7082900000	4.92918	4.96521	4.73118	4.7687	4.86965	4.96461	4.93716	5.26133	5.31454	5.36375	5.08685	5.17837	4.93936	5.31324	4.88081	5.20821	0.327394	0.00217604	0.0300071
1710	sp|P78344|IF4G2_HUMAN	sp|P78344|IF4G2_HUMAN	37	sp|P78344|IF4G2_HUMAN Eukaryotic translation initiation factor 4 gamma 2 OS=Homo sapiens OX=9606 GN=EIF4G2 PE=1 SV=1	3.12692	3.44265	sp|P78344|IF4G2_HUMAN	0.315727	0.14366	0.487794	3.28479	3.93438	0.00148893	0.0237925	0	1361600000	838540000	996090000	611210000	1995400000	1591100000	1101100000	1998300000	2200500000	2030200000	1815300000	1469300000	1412100000	1998100000	3.04691	3.17542	3.25034	3.02785	3.00891	3.30895	3.0701	3.37999	3.55157	3.50984	3.49529	3.34045	3.33108	3.49035	3.12692	3.44265	0.315727	0.00148893	0.0237925
1132	sp|P33176|KINH_HUMAN	sp|P33176|KINH_HUMAN	59	sp|P33176|KINH_HUMAN Kinesin-1 heavy chain OS=Homo sapiens OX=9606 GN=KIF5B PE=1 SV=1	4.92551	5.23797	sp|P33176|KINH_HUMAN	0.312459	0.133297	0.491621	5.08174	3.73945	0.00218821	0.0300071	0	5169200000	3220600000	3182600000	2218900000	6191800000	5282900000	4069100000	7007900000	7589100000	7080100000	5861300000	5330800000	5021000000	6594800000	4.97196	5.09553	4.88825	4.89536	4.65374	5.03645	4.93727	5.20032	5.35044	5.3546	5.18383	5.21413	5.15206	5.21039	4.92551	5.23797	0.312459	0.00218821	0.0300071
899	sp|P17812|PYRG1_HUMAN	sp|P17812|PYRG1_HUMAN	26	sp|P17812|PYRG1_HUMAN CTP synthase 1 OS=Homo sapiens OX=9606 GN=CTPS1 PE=1 SV=2	3.41563	3.72759	sp|P17812|PYRG1_HUMAN	0.311954	0.118856	0.505053	3.57161	3.46396	0.00378258	0.0411356	0	1597500000	967690000	1146400000	692080000	2663900000	2075500000	1462600000	2599500000	2592400000	2397000000	2271900000	1748900000	1651100000	2510100000	3.27747	3.37982	3.44851	3.20784	3.42861	3.69154	3.47565	3.76157	3.78971	3.75511	3.81851	3.59372	3.55553	3.81896	3.41563	3.72759	0.311954	0.00378258	0.0411356
902	sp|P17980|PRS6A_HUMAN	sp|P17980|PRS6A_HUMAN	27	sp|P17980|PRS6A_HUMAN 26S proteasome regulatory subunit 6A OS=Homo sapiens OX=9606 GN=PSMC3 PE=1 SV=3	3.67167	3.98256	sp|P17980|PRS6A_HUMAN	0.310888	0.134809	0.486966	3.82711	3.7858	0.00199635	0.028858	0	2187500000	1316200000	1186700000	873170000	2957600000	2280100000	1714700000	3277800000	3155000000	2892200000	2400600000	2211800000	2105400000	2720600000	3.73103	3.81872	3.49723	3.54449	3.58053	3.82688	3.70281	4.09793	4.07509	4.03246	3.89789	3.93513	3.90445	3.93496	3.67167	3.98256	0.310888	0.00199635	0.028858
1194	sp|P38606|VATA_HUMAN	sp|P38606|VATA_HUMAN	25	sp|P38606|VATA_HUMAN V-type proton ATPase catalytic subunit A OS=Homo sapiens OX=9606 GN=ATP6V1A PE=1 SV=2	3.02508	3.33563	sp|P38606|VATA_HUMAN	0.310554	0.123765	0.497342	3.18036	3.5649	0.00309427	0.0363422	0	1169800000	808570000	784980000	640810000	2077300000	1423000000	1046800000	1984500000	2018600000	1997300000	1471700000	1367700000	1265100000	1963300000	2.82782	3.12348	2.9145	3.09635	3.06733	3.14821	2.99786	3.36993	3.4262	3.48571	3.19301	3.23627	3.17328	3.46504	3.02508	3.33563	0.310554	0.00309427	0.0363422
2251	sp|Q16181|SEPT7_HUMAN	sp|Q16181|SEPT7_HUMAN	31	sp|Q16181|SEPT7_HUMAN Septin-7 OS=Homo sapiens OX=9606 GN=SEPTIN7 PE=1 SV=2	3.66604	3.96488	sp|Q16181|SEPT7_HUMAN	0.298839	0.120485	0.477193	3.81546	3.59266	0.00292816	0.0350038	0	1813100000	1273000000	1352200000	981780000	3166500000	2181100000	1587600000	2685900000	2607500000	3021600000	2504600000	2407200000	2317300000	2827800000	3.46015	3.7711	3.68132	3.71431	3.67967	3.76298	3.5928	3.809	3.79815	4.09709	3.95899	4.05822	4.04211	3.99063	3.66604	3.96488	0.298839	0.00292816	0.0350038
1261	sp|P43490|NAMPT_HUMAN	sp|P43490|NAMPT_HUMAN	27	sp|P43490|NAMPT_HUMAN Nicotinamide phosphoribosyltransferase OS=Homo sapiens OX=9606 GN=NAMPT PE=1 SV=1	4.30805	4.60363	sp|P43490|NAMPT_HUMAN	0.295583	0.141041	0.450125	4.45584	4.10103	0.00107354	0.0195484	0	3333200000	1828400000	2096700000	1619000000	4496300000	3235800000	2553100000	4605800000	4662400000	4692900000	3853500000	3543100000	3257500000	4064800000	4.33879	4.28773	4.2998	4.43881	4.18897	4.3308	4.27144	4.5914	4.64256	4.74728	4.57966	4.62021	4.53097	4.51332	4.30805	4.60363	0.295583	0.00107354	0.0195484
1061	sp|P29144|TPP2_HUMAN	sp|P29144|TPP2_HUMAN	46	sp|P29144|TPP2_HUMAN Tripeptidyl-peptidase 2 OS=Homo sapiens OX=9606 GN=TPP2 PE=1 SV=4	3.95314	4.21559	sp|P29144|TPP2_HUMAN	0.262449	0.0943422	0.430556	4.08436	3.3475	0.00477013	0.0480903	0	2641300000	1551000000	1419200000	1100300000	3671600000	2762600000	2095400000	3356600000	3692800000	3272100000	3049300000	2535200000	2780800000	3221400000	4.00306	4.05294	3.74951	3.87939	3.89464	4.1032	3.98923	4.1324	4.30379	4.21472	4.24247	4.13354	4.30385	4.17835	3.95314	4.21559	0.262449	0.00477013	0.0480903

## Sheet: DownReg 5-7
	ProteinName	TopProteinName	nrPeptides	Fasta.headers	RKO	RKOR	proteinID	log2FC	CI.L	CI.R	AveExpr	t	P.Value	adj.P.Val	nrNAs	003_S211427_cell_5_RKO.raw	006_S211425_cell_3_RKO.raw	010_S211423_cell_1_RKO.raw	013_S211428_cell_6_RKO.raw	016_S211429_cell_7_RKO.raw	017_S211426_cell_4_RKO.raw	019_S211424_cell_2_RKO.raw	002_S211433_cell_11_RKO.R.raw	004_S211430_cell_8_RKO.R.raw	005_S211436_cell_14_RKO.R.raw	009_S211434_cell_12_RKO.R.raw	011_S211435_cell_13_RKO.R.raw	012_S211432_cell_10_RKO.R.raw	018_S211431_cell_9_RKO.R.raw	003_S211427_cell_5_RKO.transformed	006_S211425_cell_3_RKO.transformed	010_S211423_cell_1_RKO.transformed	013_S211428_cell_6_RKO.transformed	016_S211429_cell_7_RKO.transformed	017_S211426_cell_4_RKO.transformed	019_S211424_cell_2_RKO.transformed	002_S211433_cell_11_RKO.R.transformed	004_S211430_cell_8_RKO.R.transformed	005_S211436_cell_14_RKO.R.transformed	009_S211434_cell_12_RKO.R.transformed	011_S211435_cell_13_RKO.R.transformed	012_S211432_cell_10_RKO.R.transformed	018_S211431_cell_9_RKO.R.transformed	pseudo.RKO	pseudo.RKOR	pseudo.log2FC	pseudo.P.Value	pseudo.adj.P.Val
615	sp|P00367|DHE3_HUMAN;zz|Y-FGCZCont00492|;sp|P49448|DHE4_HUMAN	sp|P00367|DHE3_HUMAN	30	sp|P00367|DHE3_HUMAN Glutamate dehydrogenase 1, mitochondrial OS=Homo sapiens OX=9606 GN=GLUD1 PE=1 SV=2;zz|Y-FGCZCont00492| sp|DHE3_BOVIN|;sp|P49448|DHE4_HUMAN Glutamate dehydrogenase 2, mitochondrial OS=Homo sapiens OX=9606 GN=GLUD2 PE=1 SV=2	4.88363	4.5824	sp|P00367|DHE3_HUMAN	-0.301222	-0.478212	-0.124233	4.73301	-3.64923	0.00261696	0.0330496	0	5162000000	2438900000	3203100000	2246900000	7362600000	4336600000	4397600000	4207300000	4615700000	4119400000	3549100000	3861000000	3371100000	4461800000	4.96995	4.69882	4.8973	4.91353	4.9053	4.75231	5.04817	4.46011	4.62793	4.55479	4.46112	4.74513	4.58018	4.64756	4.88363	4.5824	-0.301222	0.00261696	0.0330496
3838	sp|Q9H832|UBE2Z_HUMAN	sp|Q9H832|UBE2Z_HUMAN	6	sp|Q9H832|UBE2Z_HUMAN Ubiquitin-conjugating enzyme E2 Z OS=Homo sapiens OX=9606 GN=UBE2Z PE=1 SV=2	0.629734	0.321225	sp|Q9H832|UBE2Z_HUMAN	-0.308508	-0.502995	-0.114022	0.475479	-3.40124	0.00428578	0.0445456	0	224570000	149250000	160920000	112880000	441230000	231420000	200560000	228840000	232570000	200920000	207180000	220070000	177420000	222740000	0.446282	0.71255	0.679962	0.581268	0.81697	0.533614	0.637489	0.236147	0.286277	0.0939989	0.368625	0.580061	0.353426	0.330042	0.629734	0.321225	-0.308508	0.00428578	0.0445456
2066	sp|Q14192|FHL2_HUMAN	sp|Q14192|FHL2_HUMAN	17	sp|Q14192|FHL2_HUMAN Four and a half LIM domains protein 2 OS=Homo sapiens OX=9606 GN=FHL2 PE=1 SV=3	3.228	2.90567	sp|Q14192|FHL2_HUMAN	-0.322338	-0.51807	-0.126606	3.06684	-3.5311	0.00330941	0.0378287	0	1668300000	1003200000	897200000	692020000	2069900000	1580100000	1166900000	1459500000	1433700000	1604300000	1124800000	1138500000	936580000	1243600000	3.34004	3.43124	3.10291	3.20771	3.06215	3.29896	3.15301	2.92415	2.92906	3.16213	2.80576	2.9696	2.74167	2.8073	3.228	2.90567	-0.322338	0.00330941	0.0378287
2387	sp|Q5JTV8|TOIP1_HUMAN	sp|Q5JTV8|TOIP1_HUMAN	19	sp|Q5JTV8|TOIP1_HUMAN Torsin-1A-interacting protein 1 OS=Homo sapiens OX=9606 GN=TOR1AIP1 PE=1 SV=2	2.84382	2.52033	sp|Q5JTV8|TOIP1_HUMAN	-0.323486	-0.523551	-0.123421	2.68207	-3.46693	0.00376023	0.0410442	0	1238200000	613550000	762650000	610800000	1802500000	1049400000	908550000	987970000	1175600000	1070100000	875440000	714890000	823570000	1224200000	2.90982	2.72966	2.87381	3.02688	2.86123	2.70981	2.79553	2.35807	2.64066	2.56411	2.44471	2.29303	2.55708	2.78465	2.84382	2.52033	-0.323486	0.00376023	0.0410442
2625	sp|Q7L0Y3|TM10C_HUMAN	sp|Q7L0Y3|TM10C_HUMAN	18	sp|Q7L0Y3|TM10C_HUMAN tRNA methyltransferase 10 homolog C OS=Homo sapiens OX=9606 GN=TRMT10C PE=1 SV=2	2.43328	2.10157	sp|Q7L0Y3|TM10C_HUMAN	-0.331702	-0.497407	-0.165996	2.26742	-4.2921	0.000739945	0.0159462	0	1015300000	503980000	504310000	429750000	1339800000	794000000	695410000	799370000	780000000	839580000	697940000	662110000	592710000	722550000	2.62342	2.44895	2.29061	2.51766	2.43032	2.30834	2.41363	2.05076	2.04458	2.20583	2.11828	2.18152	2.08489	2.02516	2.43328	2.10157	-0.331702	0.000739945	0.0159462
2142	sp|Q15018|ABRX2_HUMAN	sp|Q15018|ABRX2_HUMAN	9	sp|Q15018|ABRX2_HUMAN BRISC complex subunit Abraxas 2 OS=Homo sapiens OX=9606 GN=ABRAXAS2 PE=1 SV=2	-0.445876	-0.777659	sp|Q15018|ABRX2_HUMAN	-0.331782	-0.534845	-0.128719	-0.611768	-3.50335	0.0034973	0.0393725	0	121990000	82668000	79221000	49208000	162810000	116570000	88506000	101340000	117830000	119390000	97944000	84567000	84756000	95258000	-0.434309	-0.130442	-0.319275	-0.621328	-0.631189	-0.453531	-0.531059	-0.945558	-0.701699	-0.674698	-0.710648	-0.810462	-0.70703	-0.893515	-0.445876	-0.777659	-0.331782	0.0034973	0.0393725
3258	sp|Q96DV4|RM38_HUMAN	sp|Q96DV4|RM38_HUMAN	9	sp|Q96DV4|RM38_HUMAN 39S ribosomal protein L38, mitochondrial OS=Homo sapiens OX=9606 GN=MRPL38 PE=1 SV=2	0.271914	-0.0659267	sp|Q96DV4|RM38_HUMAN	-0.33784	-0.551543	-0.124138	0.102994	-3.38971	0.00438541	0.0452806	0	201450000	121650000	142690000	82473000	337890000	183810000	121760000	186120000	199430000	173990000	148030000	141370000	120160000	182470000	0.289505	0.420787	0.51043	0.126668	0.429365	0.202045	-0.0754044	-0.0636255	0.0629077	-0.118527	-0.11566	-0.0633896	-0.205977	0.0427846	0.271914	-0.0659267	-0.33784	0.00438541	0.0452806
1445	sp|P52209|6PGD_HUMAN	sp|P52209|6PGD_HUMAN	29	sp|P52209|6PGD_HUMAN 6-phosphogluconate dehydrogenase, decarboxylating OS=Homo sapiens OX=9606 GN=PGD PE=1 SV=3	5.27189	4.93229	sp|P52209|6PGD_HUMAN	-0.339609	-0.527011	-0.152207	5.10209	-3.88566	0.00163896	0.0254962	0	5743900000	4263100000	4009100000	3219200000	8639600000	6398700000	4841200000	5667600000	5415300000	6029900000	4814800000	4348100000	3982600000	5771200000	5.12408	5.49567	5.21378	5.43436	5.13763	5.3123	5.18545	4.89236	4.86007	5.11749	4.9005	4.91788	4.81947	5.01823	5.27189	4.93229	-0.339609	0.00163896	0.0254962
3311	sp|Q96GW9|SYMM_HUMAN	sp|Q96GW9|SYMM_HUMAN	18	sp|Q96GW9|SYMM_HUMAN Methionine--tRNA ligase, mitochondrial OS=Homo sapiens OX=9606 GN=MARS2 PE=1 SV=2	1.63674	1.29182	sp|Q96GW9|SYMM_HUMAN	-0.344914	-0.556164	-0.133663	1.46428	-3.50085	0.00351474	0.0393725	0	548350000	256890000	347640000	258190000	666910000	493650000	406990000	475420000	534870000	435270000	348780000	388870000	286370000	483470000	1.73449	1.48739	1.76605	1.77966	1.417	1.62419	1.64838	1.29691	1.4964	1.23566	1.11896	1.40777	1.04069	1.44638	1.63674	1.29182	-0.344914	0.00351474	0.0393725
1908	sp|Q12931|TRAP1_HUMAN	sp|Q12931|TRAP1_HUMAN	33	sp|Q12931|TRAP1_HUMAN Heat shock protein 75 kDa, mitochondrial OS=Homo sapiens OX=9606 GN=TRAP1 PE=1 SV=3	4.94297	4.59767	sp|Q12931|TRAP1_HUMAN	-0.345307	-0.508485	-0.18213	4.77032	-4.53738	0.000461315	0.011883	0	5440400000	2877500000	3586200000	2238200000	8161600000	4457300000	3719600000	4640300000	4610300000	4271700000	3826300000	3515300000	3625600000	3982700000	5.04574	4.93479	5.0566	4.90791	5.05495	4.79183	4.80899	4.60223	4.62623	4.6084	4.56946	4.60875	4.68466	4.48393	4.94297	4.59767	-0.345307	0.000461315	0.011883
1940	sp|Q13177|PAK2_HUMAN	sp|Q13177|PAK2_HUMAN	24	sp|Q13177|PAK2_HUMAN Serine/threonine-protein kinase PAK 2 OS=Homo sapiens OX=9606 GN=PAK2 PE=1 SV=3	3.49032	3.14409	sp|Q13177|PAK2_HUMAN	-0.346228	-0.544784	-0.147672	3.31721	-3.73886	0.00219077	0.0300071	0	1916100000	1131100000	1200000000	782870000	3052100000	1747000000	1312400000	1588300000	1781600000	1502400000	1517000000	1272300000	1475400000	1317100000	3.53988	3.60246	3.51294	3.38638	3.62622	3.44351	3.32087	3.04684	3.24473	3.06521	3.23669	3.13115	3.39402	2.89002	3.49032	3.14409	-0.346228	0.00219077	0.0300071
2730	sp|Q86VP6|CAND1_HUMAN	sp|Q86VP6|CAND1_HUMAN	61	sp|Q86VP6|CAND1_HUMAN Cullin-associated NEDD8-dissociated protein 1 OS=Homo sapiens OX=9606 GN=CAND1 PE=1 SV=2	5.8013	5.45455	sp|Q86VP6|CAND1_HUMAN	-0.346749	-0.558129	-0.135369	5.62792	-3.51732	0.00340144	0.0386924	0	9389200000	5951200000	6743900000	3789100000	11302000000	9396900000	7409200000	7474400000	9666500000	7250000000	6623600000	5697100000	6549000000	8596500000	5.8332	5.97167	5.94709	5.67045	5.52781	5.86549	5.79335	5.29381	5.702	5.38962	5.35997	5.31075	5.53345	5.59222	5.8013	5.45455	-0.346749	0.00340144	0.0386924
1514	sp|P55084|ECHB_HUMAN	sp|P55084|ECHB_HUMAN	29	sp|P55084|ECHB_HUMAN Trifunctional enzyme subunit beta, mitochondrial OS=Homo sapiens OX=9606 GN=HADHB PE=1 SV=3	4.93178	4.58388	sp|P55084|ECHB_HUMAN	-0.347894	-0.555353	-0.140436	4.75783	-3.59564	0.00291083	0.0348929	0	5721600000	2707400000	3056900000	2332800000	7731900000	4600900000	4085300000	4956000000	3519600000	3944700000	4045500000	4078700000	3526200000	4156100000	5.11847	4.84785	4.83143	4.96787	4.97639	4.83748	4.94295	4.69772	4.23399	4.49079	4.64971	4.82488	4.64475	4.54532	4.93178	4.58388	-0.347894	0.00291083	0.0348929
3494	sp|Q99798|ACON_HUMAN	sp|Q99798|ACON_HUMAN	29	sp|Q99798|ACON_HUMAN Aconitate hydratase, mitochondrial OS=Homo sapiens OX=9606 GN=ACO2 PE=1 SV=2	3.61018	3.25833	sp|Q99798|ACON_HUMAN	-0.351851	-0.557989	-0.145714	3.43425	-3.65984	0.0025624	0.0329275	0	2452400000	965150000	1265200000	805020000	3139400000	1915100000	1762300000	1608800000	1896600000	1889500000	1442700000	1453600000	1335400000	1706800000	3.89598	3.37607	3.58755	3.42679	3.66718	3.57576	3.74192	3.06545	3.33562	3.40377	3.16434	3.32483	3.25091	3.26337	3.61018	3.25833	-0.351851	0.0025624	0.0329275
1952	sp|Q13263|TIF1B_HUMAN	sp|Q13263|TIF1B_HUMAN	40	sp|Q13263|TIF1B_HUMAN Transcription intermediary factor 1-beta OS=Homo sapiens OX=9606 GN=TRIM28 PE=1 SV=5	5.32071	4.95792	sp|Q13263|TIF1B_HUMAN	-0.362789	-0.577831	-0.147747	5.13931	-3.61735	0.00278795	0.0343041	0	6678500000	4749600000	4703000000	2998900000	7984500000	6396500000	4716000000	6408400000	6452900000	5473100000	4726400000	4050900000	4202700000	5543400000	5.34162	5.64986	5.43887	5.33168	5.02309	5.3118	5.14802	5.07058	5.11479	4.97441	4.87381	4.81494	4.89669	4.96022	5.32071	4.95792	-0.362789	0.00278795	0.0343041
725	sp|P08237|PFKAM_HUMAN	sp|P08237|PFKAM_HUMAN	29	sp|P08237|PFKAM_HUMAN ATP-dependent 6-phosphofructokinase, muscle type OS=Homo sapiens OX=9606 GN=PFKM PE=1 SV=2	3.85955	3.48862	sp|P08237|PFKAM_HUMAN	-0.370924	-0.535062	-0.206786	3.67409	-4.84548	0.000257247	0.00816586	0	2057200000	1375100000	1520400000	1142900000	3895500000	2365200000	1903400000	2099500000	2046900000	2150500000	1650200000	1652800000	1625600000	2046400000	3.64241	3.88118	3.84663	3.93441	3.98063	3.87963	3.85195	3.45166	3.44643	3.59485	3.35793	3.51155	3.53319	3.52476	3.85955	3.48862	-0.370924	0.000257247	0.00816586
4012	sp|Q9NUQ2|PLCE_HUMAN	sp|Q9NUQ2|PLCE_HUMAN	4	sp|Q9NUQ2|PLCE_HUMAN 1-acyl-sn-glycerol-3-phosphate acyltransferase epsilon OS=Homo sapiens OX=9606 GN=AGPAT5 PE=1 SV=3	-0.947938	-1.33459	sp|Q9NUQ2|PLCE_HUMAN	-0.386649	-0.599121	-0.174177	-1.14126	-3.9019	0.0015873	0.0247745	0	92440000	45472000	44204000	37694000	117970000	96068000	71433000	70329000	84169000	71999000	55617000	55898000	59189000	82894000	-0.834569	-0.983345	-1.14192	-1.00742	-1.09913	-0.731988	-0.837195	-1.47552	-1.19052	-1.42159	-1.52588	-1.4124	-1.22243	-1.09378	-0.947938	-1.33459	-0.386649	0.0015873	0.0247745
1761	sp|Q00577|PURA_HUMAN	sp|Q00577|PURA_HUMAN	6	sp|Q00577|PURA_HUMAN Transcriptional activator protein Pur-alpha OS=Homo sapiens OX=9606 GN=PURA PE=1 SV=2	1.52386	1.13663	sp|Q00577|PURA_HUMAN	-0.387224	-0.557617	-0.216831	1.33024	-4.87272	0.000244434	0.00797466	0	549470000	272960000	283530000	210580000	722670000	446220000	337310000	378340000	392490000	424520000	370710000	331460000	315840000	402360000	1.73743	1.57397	1.47862	1.48443	1.53364	1.47878	1.38013	0.965546	1.04667	1.19873	1.2068	1.17553	1.18129	1.18185	1.52386	1.13663	-0.387224	0.000244434	0.00797466
426	sp|O75390|CISY_HUMAN	sp|O75390|CISY_HUMAN	15	sp|O75390|CISY_HUMAN Citrate synthase, mitochondrial OS=Homo sapiens OX=9606 GN=CS PE=1 SV=2	4.44837	4.06032	sp|O75390|CISY_HUMAN	-0.388045	-0.606874	-0.169216	4.25435	-3.80222	0.00193257	0.0280681	0	4385200000	2139300000	1995200000	1788700000	5408100000	3081600000	2719200000	3554100000	3302700000	2818600000	2754500000	2660900000	1956300000	2791600000	4.73461	4.5118	4.22983	4.58319	4.45717	4.26051	4.36148	4.21534	4.14157	3.99439	4.09599	4.2039	3.79901	3.97207	4.44837	4.06032	-0.388045	0.00193257	0.0280681
3895	sp|Q9HCC0|MCCB_HUMAN	sp|Q9HCC0|MCCB_HUMAN	20	sp|Q9HCC0|MCCB_HUMAN Methylcrotonoyl-CoA carboxylase beta chain, mitochondrial OS=Homo sapiens OX=9606 GN=MCCC2 PE=1 SV=1	2.76331	2.36893	sp|Q9HCC0|MCCB_HUMAN	-0.394386	-0.572279	-0.216493	2.56612	-4.7536	0.000305836	0.00879639	0	1267300000	595550000	681790000	526980000	1528700000	1063200000	932900000	1040800000	990600000	811070000	796480000	843950000	707520000	950570000	2.94334	2.68717	2.71578	2.81308	2.62191	2.72861	2.83331	2.43365	2.39187	2.15481	2.30853	2.53433	2.33906	2.42024	2.76331	2.36893	-0.394386	0.000305836	0.00879639
79	sp|A3KMH1|VWA8_HUMAN	sp|A3KMH1|VWA8_HUMAN	28	sp|A3KMH1|VWA8_HUMAN von Willebrand factor A domain-containing protein 8 OS=Homo sapiens OX=9606 GN=VWA8 PE=1 SV=2	1.25005	0.846024	sp|A3KMH1|VWA8_HUMAN	-0.404024	-0.658359	-0.149688	1.04804	-3.40612	0.00424433	0.0443424	0	520020000	191510000	224150000	145850000	599670000	373500000	351520000	316210000	341240000	296670000	286770000	247510000	269370000	397210000	1.65794	1.0683	1.14726	0.952435	1.26263	1.22269	1.43908	0.705299	0.843356	0.669532	0.836948	0.750903	0.952837	1.16329	1.25005	0.846024	-0.404024	0.00424433	0.0443424
888	sp|P17096|HMGA1_HUMAN	sp|P17096|HMGA1_HUMAN	10	sp|P17096|HMGA1_HUMAN High mobility group protein HMG-I/HMG-Y OS=Homo sapiens OX=9606 GN=HMGA1 PE=1 SV=3	5.1293	4.72516	sp|P17096|HMGA1_HUMAN	-0.404137	-0.650657	-0.157618	4.92723	-3.5151	0.00341645	0.0387693	0	6435200000	3379800000	3603500000	2793600000	7687500000	5097400000	4915800000	5635200000	4634100000	5549000000	3728000000	3913200000	4384500000	3528600000	5.28807	5.16437	5.06338	5.22897	4.96803	4.985	5.2073	4.88404	4.63371	4.99475	4.53197	4.76466	4.95748	4.30955	5.1293	4.72516	-0.404137	0.00341645	0.0387693
4332	sp|Q9UKV8|AGO2_HUMAN	sp|Q9UKV8|AGO2_HUMAN	18	sp|Q9UKV8|AGO2_HUMAN Protein argonaute-2 OS=Homo sapiens OX=9606 GN=AGO2 PE=1 SV=3	1.38169	0.974487	sp|Q9UKV8|AGO2_HUMAN	-0.407205	-0.62188	-0.192529	1.17809	-4.06715	0.00114715	0.020414	0	428950000	257060000	283280000	171150000	665140000	398820000	344830000	314320000	347350000	374480000	282750000	362460000	281450000	381250000	1.38013	1.48833	1.47737	1.18413	1.41314	1.31711	1.41163	0.696602	0.869142	1.01351	0.816611	1.30552	1.01581	1.10422	1.38169	0.974487	-0.407205	0.00114715	0.020414
664	sp|P05091|ALDH2_HUMAN	sp|P05091|ALDH2_HUMAN	30	sp|P05091|ALDH2_HUMAN Aldehyde dehydrogenase, mitochondrial OS=Homo sapiens OX=9606 GN=ALDH2 PE=1 SV=2	4.23356	3.81357	sp|P05091|ALDH2_HUMAN	-0.419993	-0.626769	-0.213217	4.02356	-4.35514	0.000654941	0.0147928	0	3518000000	1589100000	1869000000	1553100000	4004700000	2903900000	2830100000	2649100000	2426300000	2239700000	2144900000	2238800000	2258400000	2589900000	4.41665	4.08757	4.1377	4.37862	4.02078	4.17501	4.41858	3.78899	3.6935	3.65487	3.73564	3.95277	4.00515	3.86404	4.23356	3.81357	-0.419993	0.000654941	0.0147928
796	sp|P11310|ACADM_HUMAN	sp|P11310|ACADM_HUMAN	17	sp|P11310|ACADM_HUMAN Medium-chain specific acyl-CoA dehydrogenase, mitochondrial OS=Homo sapiens OX=9606 GN=ACADM PE=1 SV=1	3.04401	2.61992	sp|P11310|ACADM_HUMAN	-0.42409	-0.618001	-0.230178	2.83197	-4.68937	0.000345358	0.00971551	0	1690400000	718510000	803490000	675580000	1797900000	1218900000	1117300000	1172200000	1160000000	1167500000	1001300000	871200000	784570000	1164900000	3.35903	2.95499	2.94736	3.17288	2.85752	2.92535	3.09096	2.60613	2.62125	2.69276	2.63822	2.58054	2.48744	2.71313	3.04401	2.61992	-0.42409	0.000345358	0.00971551
522	sp|O94973|AP2A2_HUMAN	sp|O94973|AP2A2_HUMAN	22	sp|O94973|AP2A2_HUMAN AP-2 complex subunit alpha-2 OS=Homo sapiens OX=9606 GN=AP2A2 PE=1 SV=2	0.644139	0.218877	sp|O94973|AP2A2_HUMAN	-0.425262	-0.6953	-0.155225	0.431508	-3.37671	0.00450043	0.0460345	0	357460000	117790000	166460000	108370000	425450000	248990000	165640000	203090000	246380000	223820000	181470000	142580000	191720000	211320000	1.11704	0.374777	0.727688	0.522209	0.76407	0.638957	0.364228	0.0629644	0.370093	0.253399	0.177752	-0.0509984	0.464699	0.254228	0.644139	0.218877	-0.425262	0.00450043	0.0460345
2254	sp|Q16222|UAP1_HUMAN	sp|Q16222|UAP1_HUMAN	33	sp|Q16222|UAP1_HUMAN UDP-N-acetylhexosamine pyrophosphorylase OS=Homo sapiens OX=9606 GN=UAP1 PE=1 SV=3	6.51107	6.08259	sp|Q16222|UAP1_HUMAN	-0.428478	-0.687427	-0.16953	6.29683	-3.54794	0.0032004	0.0369422	0	13455000000	10829000000	10784000000	6573200000	18921000000	15479000000	11829000000	12225000000	11658000000	14582000000	11471000000	9407500000	11100000000	9218400000	6.35238	6.82586	6.609	6.46835	6.2763	6.58396	6.46163	6.00758	5.97419	6.4216	6.15111	6.03996	6.29086	5.69283	6.51107	6.08259	-0.428478	0.0032004	0.0369422
4078	sp|Q9NX20|RM16_HUMAN	sp|Q9NX20|RM16_HUMAN	5	sp|Q9NX20|RM16_HUMAN 39S ribosomal protein L16, mitochondrial OS=Homo sapiens OX=9606 GN=MRPL16 PE=1 SV=1	0.308787	-0.128381	sp|Q9NX20|RM16_HUMAN	-0.437168	-0.65667	-0.217667	0.0902029	-4.27043	0.00077171	0.0162578	0	193330000	106380000	154930000	84914000	347740000	173040000	160630000	165780000	165140000	164590000	146460000	157250000	145460000	145430000	0.230136	0.229398	0.626474	0.168916	0.471104	0.115127	0.320355	-0.231522	-0.211232	-0.20055	-0.13102	0.0913885	0.0683117	-0.284044	0.308787	-0.128381	-0.437168	0.00077171	0.0162578
4546	sp|Q9Y4P3|TBL2_HUMAN	sp|Q9Y4P3|TBL2_HUMAN	20	sp|Q9Y4P3|TBL2_HUMAN Transducin beta-like protein 2 OS=Homo sapiens OX=9606 GN=TBL2 PE=1 SV=1	1.6387	1.19969	sp|Q9Y4P3|TBL2_HUMAN	-0.439014	-0.618772	-0.259257	1.4192	-5.23663	0.000124632	0.00518876	0	473170000	316700000	322330000	257400000	702670000	475470000	411880000	426840000	497430000	436530000	394360000	312370000	312900000	373170000	1.52171	1.78604	1.65946	1.77523	1.49287	1.57017	1.66544	1.14053	1.39095	1.23993	1.29589	1.08928	1.16787	1.07336	1.6387	1.19969	-0.439014	0.000124632	0.00518876
1184	sp|P36957|ODO2_HUMAN	sp|P36957|ODO2_HUMAN	14	sp|P36957|ODO2_HUMAN Dihydrolipoyllysine-residue succinyltransferase component of 2-oxoglutarate dehydrogenase complex, mitochondrial OS=Homo sapiens OX=9606 GN=DLST PE=1 SV=4	3.17183	2.73159	sp|P36957|ODO2_HUMAN	-0.44025	-0.70929	-0.171209	2.95171	-3.50866	0.00346051	0.0390804	0	1768200000	813030000	1074700000	839640000	1736000000	1255200000	1069200000	1655300000	1296000000	1186900000	962950000	873130000	897980000	1128900000	3.42397	3.13133	3.35745	3.48778	2.80662	2.96759	3.02811	3.10679	2.78234	2.7171	2.58196	2.58375	2.68125	2.66791	3.17183	2.73159	-0.44025	0.00346051	0.0390804
1275	sp|P46063|RECQ1_HUMAN	sp|P46063|RECQ1_HUMAN	23	sp|P46063|RECQ1_HUMAN ATP-dependent DNA helicase Q1 OS=Homo sapiens OX=9606 GN=RECQL PE=1 SV=3	2.84392	2.40032	sp|P46063|RECQ1_HUMAN	-0.443605	-0.690822	-0.196388	2.62212	-3.8475	0.00176717	0.026627	0	1110300000	605900000	730950000	506560000	2262500000	931590000	1159300000	926860000	893770000	1047200000	827190000	743310000	734000000	1120900000	2.75249	2.71175	2.81395	2.75584	3.19138	2.53839	3.14368	2.26544	2.24241	2.53217	2.36304	2.34971	2.3918	2.65767	2.84392	2.40032	-0.443605	0.00176717	0.026627
1248	sp|P42765|THIM_HUMAN	sp|P42765|THIM_HUMAN	23	sp|P42765|THIM_HUMAN 3-ketoacyl-CoA thiolase, mitochondrial OS=Homo sapiens OX=9606 GN=ACAA2 PE=1 SV=2	3.85609	3.41034	sp|P42765|THIM_HUMAN	-0.445749	-0.659643	-0.231855	3.63322	-4.4684	0.000526545	0.0128839	0	2877200000	1233700000	1587300000	1248800000	2939600000	2423600000	1691400000	1949300000	1908400000	2077100000	1819800000	1589400000	1355200000	1895800000	4.1265	3.72635	3.90735	4.06276	3.57166	3.91474	3.68327	3.34397	3.34463	3.54357	3.49886	3.45469	3.27204	3.41465	3.85609	3.41034	-0.445749	0.000526545	0.0128839
1440	sp|P51858|HDGF_HUMAN	sp|P51858|HDGF_HUMAN	18	sp|P51858|HDGF_HUMAN Hepatoma-derived growth factor OS=Homo sapiens OX=9606 GN=HDGF PE=1 SV=1	4.00353	3.55456	sp|P51858|HDGF_HUMAN	-0.448973	-0.687908	-0.210039	3.77904	-4.02905	0.00123612	0.0212721	0	2643900000	1668900000	1904400000	1010600000	4677800000	2114400000	2078500000	2326200000	2239400000	2037300000	1774600000	1883400000	1922700000	1692500000	4.00448	4.15748	4.16416	3.75621	4.24645	3.71827	3.97766	3.60041	3.57703	3.51499	3.46263	3.70145	3.77414	3.25125	4.00353	3.55456	-0.448973	0.00123612	0.0212721
1263	sp|P43897|EFTS_HUMAN	sp|P43897|EFTS_HUMAN	16	sp|P43897|EFTS_HUMAN Elongation factor Ts, mitochondrial OS=Homo sapiens OX=9606 GN=TSFM PE=1 SV=2	2.71614	2.26531	sp|P43897|EFTS_HUMAN	-0.450829	-0.639918	-0.261741	2.49073	-5.1122	0.000156611	0.00588608	0	1131100000	609190000	639800000	451220000	1867900000	967800000	907290000	847510000	903270000	826950000	778890000	852660000	671070000	811060000	2.77927	2.71948	2.62615	2.58827	2.913	2.59328	2.79355	2.1356	2.25777	2.18345	2.27636	2.54926	2.26313	2.19161	2.71614	2.26531	-0.450829	0.000156611	0.00588608
702	sp|P07355|ANXA2_HUMAN;sp|A6NMY6|AXA2L_HUMAN	sp|P07355|ANXA2_HUMAN	41	sp|P07355|ANXA2_HUMAN Annexin A2 OS=Homo sapiens OX=9606 GN=ANXA2 PE=1 SV=2;sp|A6NMY6|AXA2L_HUMAN Putative annexin A2-like protein OS=Homo sapiens OX=9606 GN=ANXA2P2 PE=5 SV=2	7.43874	6.98537	sp|P07355|ANXA2_HUMAN	-0.453367	-0.630942	-0.275793	7.21205	-5.47432	8.10274e-05	0.00400702	0	24169000000	19837000000	19481000000	12421000000	40242000000	28688000000	24581000000	24376000000	23050000000	21929000000	20439000000	17906000000	18980000000	21019000000	7.19758	7.68958	7.44285	7.39012	7.37244	7.47214	7.50644	7.00878	6.96467	7.02417	6.98322	6.97574	7.06091	6.8801	7.43874	6.98537	-0.453367	8.10274e-05	0.00400702
1395	sp|P50552|VASP_HUMAN	sp|P50552|VASP_HUMAN	20	sp|P50552|VASP_HUMAN Vasodilator-stimulated phosphoprotein OS=Homo sapiens OX=9606 GN=VASP PE=1 SV=3	2.92215	2.45642	sp|P50552|VASP_HUMAN	-0.465724	-0.702285	-0.229164	2.68929	-4.22132	0.000848994	0.0173264	0	1296500000	714990000	677640000	625020000	1935700000	1070600000	1093400000	1112500000	1319600000	1141900000	790740000	685400000	664950000	947910000	2.97621	2.94798	2.70717	3.06021	2.96478	2.7386	3.06008	2.5303	2.80856	2.66002	2.29812	2.23179	2.24998	2.41621	2.92215	2.45642	-0.465724	0.000848994	0.0173264
2198	sp|Q15392|DHC24_HUMAN	sp|Q15392|DHC24_HUMAN	10	sp|Q15392|DHC24_HUMAN Delta(24)-sterol reductase OS=Homo sapiens OX=9606 GN=DHCR24 PE=1 SV=2	1.51475	1.04773	sp|Q15392|DHC24_HUMAN	-0.467022	-0.690018	-0.244026	1.28124	-4.49057	0.000504603	0.012543	0	420170000	253810000	285100000	190900000	867460000	442350000	418720000	334060000	426440000	404090000	314250000	295360000	271880000	440790000	1.35028	1.47018	1.4864	1.34231	1.79889	1.46624	1.68897	0.784966	1.16721	1.12589	0.968774	1.00787	0.966151	1.31325	1.51475	1.04773	-0.467022	0.000504603	0.012543
1318	sp|P48637|GSHB_HUMAN	sp|P48637|GSHB_HUMAN	20	sp|P48637|GSHB_HUMAN Glutathione synthetase OS=Homo sapiens OX=9606 GN=GSS PE=1 SV=1	2.75351	2.28527	sp|P48637|GSHB_HUMAN	-0.468235	-0.746713	-0.189757	2.51939	-3.60524	0.00285587	0.0347255	0	1560800000	636870000	700670000	384650000	1741600000	1182100000	710280000	1115200000	923340000	886630000	753510000	617330000	633730000	935830000	3.24393	2.78288	2.75429	2.35707	2.8113	2.88122	2.44385	2.53381	2.28971	2.28636	2.22864	2.07971	2.18095	2.39773	2.75351	2.28527	-0.468235	0.00285587	0.0347255
721	sp|P08134|RHOC_HUMAN	sp|P08134|RHOC_HUMAN	11	sp|P08134|RHOC_HUMAN Rho-related GTP-binding protein RhoC OS=Homo sapiens OX=9606 GN=RHOC PE=1 SV=1	0.371645	-0.102242	sp|P08134|RHOC_HUMAN	-0.473887	-0.717191	-0.230583	0.134701	-4.17625	0.000926885	0.0180798	0	187640000	110520000	127670000	130310000	363220000	177000000	158990000	198850000	183970000	198020000	144510000	146780000	107390000	149960000	0.187029	0.283875	0.353599	0.78925	0.534367	0.147699	0.305696	0.0323556	-0.054337	0.0725279	-0.150329	-0.00878895	-0.367264	-0.23986	0.371645	-0.102242	-0.473887	0.000926885	0.0180798
1350	sp|P49589|SYCC_HUMAN	sp|P49589|SYCC_HUMAN	19	sp|P49589|SYCC_HUMAN Cysteine--tRNA ligase, cytoplasmic OS=Homo sapiens OX=9606 GN=CARS PE=1 SV=3	1.18521	0.710488	sp|P49589|SYCC_HUMAN	-0.474722	-0.771956	-0.177488	0.947849	-3.42453	0.00409151	0.043345	0	397290000	194210000	224890000	172530000	711690000	308630000	283440000	311240000	233610000	252780000	310700000	245570000	324990000	278350000	1.26949	1.08827	1.1519	1.19576	1.5114	0.948067	1.13158	0.682316	0.29276	0.433094	0.952407	0.739463	1.22229	0.651085	1.18521	0.710488	-0.474722	0.00409151	0.043345
3380	sp|Q96N66|MBOA7_HUMAN	sp|Q96N66|MBOA7_HUMAN	8	sp|Q96N66|MBOA7_HUMAN Lysophospholipid acyltransferase 7 OS=Homo sapiens OX=9606 GN=MBOAT7 PE=1 SV=2	1.33168	0.855158	sp|Q96N66|MBOA7_HUMAN	-0.476526	-0.695441	-0.257612	1.09342	-4.66737	0.000360078	0.00997035	0	444440000	233730000	269650000	170340000	666360000	397140000	302800000	310120000	356470000	406210000	303960000	215900000	230270000	371740000	1.43132	1.35257	1.40784	1.17726	1.4158	1.31104	1.22596	0.677086	0.906801	1.13362	0.920813	0.552247	0.727704	1.06783	1.33168	0.855158	-0.476526	0.000360078	0.00997035
621	sp|P00491|PNPH_HUMAN	sp|P00491|PNPH_HUMAN	16	sp|P00491|PNPH_HUMAN Purine nucleoside phosphorylase OS=Homo sapiens OX=9606 GN=PNP PE=1 SV=2	4.69659	4.21572	sp|P00491|PNPH_HUMAN	-0.480869	-0.69158	-0.270157	4.45616	-4.89327	0.000235206	0.00778166	0	3923500000	2696000000	2965700000	2174900000	5662500000	4025700000	3295400000	3542800000	3663300000	4084700000	2960500000	2657500000	2312000000	2894400000	4.57407	4.84183	4.78872	4.86635	4.52394	4.64522	4.63601	4.21072	4.29214	4.5423	4.19989	4.20204	4.03882	4.02416	4.69659	4.21572	-0.480869	0.000235206	0.00778166
3827	sp|Q9H7B4|SMYD3_HUMAN	sp|Q9H7B4|SMYD3_HUMAN	3	sp|Q9H7B4|SMYD3_HUMAN Histone-lysine N-methyltransferase SMYD3 OS=Homo sapiens OX=9606 GN=SMYD3 PE=1 SV=4	-2.08702	-2.57491	sp|Q9H7B4|SMYD3_HUMAN	-0.487883	-0.801171	-0.174595	-2.33096	-3.33913	0.00485034	0.0484755	0	37660000	26474000	26322000	16027000	72870000	27042000	26590000	36805000	23764000	30598000	26391000	25471000	28724000	31649000	-2.13033	-1.7552	-1.87289	-2.24616	-1.7989	-2.55683	-2.24884	-2.41496	-3.02808	-2.68532	-2.59979	-2.55516	-2.26029	-2.48074	-2.08702	-2.57491	-0.487883	0.00485034	0.0484755
1462	sp|P52788|SPSY_HUMAN	sp|P52788|SPSY_HUMAN	16	sp|P52788|SPSY_HUMAN Spermine synthase OS=Homo sapiens OX=9606 GN=SMS PE=1 SV=2	3.01477	2.52215	sp|P52788|SPSY_HUMAN	-0.492626	-0.714325	-0.270926	2.76846	-4.76445	0.000299634	0.00879639	0	1335100000	857910000	833580000	645950000	2205000000	1187400000	866660000	1069400000	1068100000	1240100000	984310000	683180000	766220000	1080500000	3.01854	3.208	2.9992	3.10792	3.15399	2.88766	2.7281	2.47297	2.50132	2.78185	2.61356	2.22707	2.45347	2.60479	3.01477	2.52215	-0.492626	0.000299634	0.00879639
2364	sp|Q53S58|TM177_HUMAN	sp|Q53S58|TM177_HUMAN	2	sp|Q53S58|TM177_HUMAN Transmembrane protein 177 OS=Homo sapiens OX=9606 GN=TMEM177 PE=1 SV=1	-1.38118	-1.87448	sp|Q53S58|TM177_HUMAN	-0.493297	-0.754192	-0.232402	-1.62783	-4.05418	0.00117669	0.0206505	0	66573000	34625000	41551000	33933000	81489000	60270000	43088000	50097000	54338000	50045000	49796000	52400000	37450000	35940000	-1.30825	-1.3722	-1.22919	-1.15967	-1.63652	-1.40313	-1.55931	-1.96765	-1.82636	-1.95874	-1.68515	-1.50636	-1.87949	-2.29759	-1.38118	-1.87448	-0.493297	0.00117669	0.0206505
1493	sp|P54132|BLM_HUMAN	sp|P54132|BLM_HUMAN	5	sp|P54132|BLM_HUMAN Bloom syndrome protein OS=Homo sapiens OX=9606 GN=BLM PE=1 SV=1	-0.271309	-0.77188	sp|P54132|BLM_HUMAN	-0.500571	-0.760465	-0.240677	-0.521594	-4.12981	0.0010148	0.0188725	0	113510000	85229000	91719000	64787000	160090000	134230000	125500000	101310000	120160000	125210000	88939000	79854000	71699000	126150000	-0.538275	-0.0869092	-0.112723	-0.222936	-0.655662	-0.250468	-0.0321878	-0.945987	-0.673247	-0.604406	-0.849585	-0.893836	-0.947186	-0.488912	-0.271309	-0.77188	-0.500571	0.0010148	0.0188725
106	sp|O00170|AIP_HUMAN	sp|O00170|AIP_HUMAN	5	sp|O00170|AIP_HUMAN AH receptor-interacting protein OS=Homo sapiens OX=9606 GN=AIP PE=1 SV=2	-0.53266	-1.03343	sp|O00170|AIP_HUMAN	-0.500772	-0.798087	-0.203458	-0.783046	-3.61148	0.00282069	0.0344197	0	143350000	75674000	56082000	46758000	180420000	121350000	68781000	113400000	104920000	84159000	84401000	62673000	53232000	98565000	-0.20148	-0.256576	-0.806336	-0.695301	-0.482008	-0.395681	-0.891237	-0.782434	-0.870314	-1.19112	-0.925031	-1.24607	-1.3747	-0.844356	-0.53266	-1.03343	-0.500772	0.00282069	0.0344197
599	sp|O95861|BPNT1_HUMAN	sp|O95861|BPNT1_HUMAN	13	sp|O95861|BPNT1_HUMAN 3(2),5-bisphosphate nucleotidase 1 OS=Homo sapiens OX=9606 GN=BPNT1 PE=1 SV=1	1.97749	1.4752	sp|O95861|BPNT1_HUMAN	-0.502283	-0.739442	-0.265124	1.72635	-4.54118	0.000457974	0.011883	0	712280000	383680000	432080000	279990000	920160000	530560000	553820000	386860000	542810000	570900000	448740000	448630000	425690000	490500000	2.11192	2.0598	2.07265	1.89707	1.88456	1.72799	2.08842	0.997854	1.51781	1.63624	1.48199	1.61561	1.60975	1.46718	1.97749	1.4752	-0.502283	0.000457974	0.011883
3469	sp|Q99575|POP1_HUMAN	sp|Q99575|POP1_HUMAN	38	sp|Q99575|POP1_HUMAN Ribonucleases P/MRP protein subunit POP1 OS=Homo sapiens OX=9606 GN=POP1 PE=1 SV=2	3.31235	2.80988	sp|Q99575|POP1_HUMAN	-0.502472	-0.761915	-0.243029	3.06112	-4.1527	0.000970444	0.0185003	0	1415100000	1097400000	1095900000	854610000	1977900000	1831300000	1139300000	1365100000	1472500000	1248100000	1040300000	971610000	1211100000	1032800000	3.10252	3.5593	3.38499	3.51337	2.99611	3.51135	3.11882	2.82715	2.96786	2.79135	2.69326	2.73913	3.11066	2.53975	3.31235	2.80988	-0.502472	0.000970444	0.0185003
2278	sp|Q16698|DECR_HUMAN	sp|Q16698|DECR_HUMAN	17	sp|Q16698|DECR_HUMAN 2,4-dienoyl-CoA reductase, mitochondrial OS=Homo sapiens OX=9606 GN=DECR1 PE=1 SV=1	4.18293	3.67315	sp|Q16698|DECR_HUMAN	-0.509781	-0.837241	-0.182321	3.92804	-3.33799	0.00486131	0.0484755	0	4407800000	1315800000	1851300000	988940000	5459200000	3037700000	2362200000	2451900000	2705600000	2137300000	1687900000	2099900000	1585300000	2565600000	4.74203	3.81828	4.12428	3.72483	4.47083	4.23986	4.16043	3.67676	3.85182	3.58576	3.39047	3.85965	3.49715	3.85046	4.18293	3.67315	-0.509781	0.00486131	0.0484755
3473	sp|Q99598|TSNAX_HUMAN	sp|Q99598|TSNAX_HUMAN	9	sp|Q99598|TSNAX_HUMAN Translin-associated protein X OS=Homo sapiens OX=9606 GN=TSNAX PE=1 SV=1	0.805595	0.293315	sp|Q99598|TSNAX_HUMAN	-0.51228	-0.812659	-0.211901	0.549455	-3.65677	0.00257805	0.0329275	0	252940000	186420000	198800000	114930000	448090000	218080000	280850000	206400000	185990000	308070000	198320000	175320000	160270000	253670000	0.617949	1.02986	0.97803	0.607337	0.83938	0.448146	1.11846	0.0864185	-0.0384698	0.725218	0.305663	0.249539	0.207495	0.517344	0.805595	0.293315	-0.51228	0.00257805	0.0329275
1131	sp|P33121|ACSL1_HUMAN	sp|P33121|ACSL1_HUMAN	24	sp|P33121|ACSL1_HUMAN Long-chain-fatty-acid--CoA ligase 1 OS=Homo sapiens OX=9606 GN=ACSL1 PE=1 SV=1	2.72069	2.20041	sp|P33121|ACSL1_HUMAN	-0.520281	-0.749615	-0.290947	2.46055	-4.86441	0.000248273	0.00804404	0	1175400000	614570000	678290000	470380000	1336600000	1326200000	819060000	950950000	842990000	795210000	739970000	627410000	559690000	1010800000	2.83471	2.73203	2.70852	2.6485	2.42685	3.0468	2.64741	2.30267	2.15742	2.12565	2.20252	2.10326	2.0026	2.50874	2.72069	2.20041	-0.520281	0.000248273	0.00804404
3902	sp|Q9HCL2|GPAT1_HUMAN	sp|Q9HCL2|GPAT1_HUMAN	2	sp|Q9HCL2|GPAT1_HUMAN Glycerol-3-phosphate acyltransferase 1, mitochondrial OS=Homo sapiens OX=9606 GN=GPAM PE=1 SV=3	-1.84893	-2.37276	sp|Q9HCL2|GPAT1_HUMAN	-0.523828	-0.784548	-0.263108	-2.11084	-4.30799	0.000717515	0.0157646	0	40959000	28145000	35218000	21486000	54993000	40871000	36114000	32093000	33067000	44607000	32681000	32561000	26367000	32427000	-2.00916	-1.66786	-1.46236	-1.82158	-2.20775	-1.96226	-1.81152	-2.6137	-2.54806	-2.12863	-2.29183	-2.19812	-2.38319	-2.44576	-1.84893	-2.37276	-0.523828	0.000717515	0.0157646
4023	sp|Q9NV56|MRGBP_HUMAN	sp|Q9NV56|MRGBP_HUMAN	2	sp|Q9NV56|MRGBP_HUMAN MRG/MORF4L-binding protein OS=Homo sapiens OX=9606 GN=MRGBP PE=1 SV=1	-1.96966	-2.49415	sp|Q9NV56|MRGBP_HUMAN	-0.524487	-0.780834	-0.268141	-2.23191	-4.38701	0.000615862	0.0142528	0	41483000	25419000	32571000	17718000	68949000	35305000	26421000	36570000	36962000	34562000	29327000	27530000	26567000	23974000	-1.99081	-1.81322	-1.57253	-2.10087	-1.87924	-2.173	-2.25795	-2.42425	-2.38626	-2.50541	-2.44783	-2.44214	-2.37235	-2.88081	-1.96966	-2.49415	-0.524487	0.000615862	0.0142528
3129	sp|Q92615|LAR4B_HUMAN	sp|Q92615|LAR4B_HUMAN	19	sp|Q92615|LAR4B_HUMAN La-related protein 4B OS=Homo sapiens OX=9606 GN=LARP4B PE=1 SV=3	2.03729	1.50849	sp|Q92615|LAR4B_HUMAN	-0.528796	-0.79198	-0.265613	1.77289	-4.30815	0.000717289	0.0157646	0	635380000	405590000	461360000	275200000	797750000	763030000	602790000	435390000	606930000	546470000	538660000	351190000	439690000	494040000	1.94706	2.13904	2.1651	1.87208	1.67721	2.25106	2.20945	1.1693	1.68004	1.57166	1.7451	1.25959	1.6562	1.47753	2.03729	1.50849	-0.528796	0.000717289	0.0157646
1155	sp|P35270|SPRE_HUMAN	sp|P35270|SPRE_HUMAN	12	sp|P35270|SPRE_HUMAN Sepiapterin reductase OS=Homo sapiens OX=9606 GN=SPR PE=1 SV=1	1.28454	0.751791	sp|P35270|SPRE_HUMAN	-0.532747	-0.872331	-0.193163	1.01816	-3.36383	0.00461741	0.0467513	0	456430000	275790000	273070000	234770000	359540000	357130000	294870000	379650000	339220000	267910000	250490000	235490000	223460000	338540000	1.46973	1.58868	1.42561	1.64193	0.519576	1.15818	1.18805	0.970561	0.834729	0.518943	0.642093	0.678524	0.684611	0.933075	1.28454	0.751791	-0.532747	0.00461741	0.0467513
4154	sp|Q9P0I2|EMC3_HUMAN	sp|Q9P0I2|EMC3_HUMAN	7	sp|Q9P0I2|EMC3_HUMAN ER membrane protein complex subunit 3 OS=Homo sapiens OX=9606 GN=EMC3 PE=1 SV=3	-0.424102	-0.966475	sp|Q9P0I2|EMC3_HUMAN	-0.542373	-0.762079	-0.322667	-0.695288	-5.29318	0.00011242	0.00489725	0	119100000	60603000	87033000	49884000	203970000	111880000	102480000	89161000	105810000	83653000	99049000	81592000	71066000	84919000	-0.468906	-0.573475	-0.186668	-0.601565	-0.303802	-0.512646	-0.32165	-1.13131	-0.858041	-1.20003	-0.694486	-0.862531	-0.959916	-1.05901	-0.424102	-0.966475	-0.542373	0.00011242	0.00489725
2833	sp|Q8IZ07|AN13A_HUMAN	sp|Q8IZ07|AN13A_HUMAN	12	sp|Q8IZ07|AN13A_HUMAN Ankyrin repeat domain-containing protein 13A OS=Homo sapiens OX=9606 GN=ANKRD13A PE=1 SV=3	0.500827	-0.0456454	sp|Q8IZ07|AN13A_HUMAN	-0.546473	-0.861459	-0.231487	0.227591	-3.71996	0.00227439	0.0304616	0	211080000	108610000	147640000	92467000	535460000	251310000	157100000	196730000	155180000	245020000	134940000	147940000	140340000	155000000	0.356888	0.259	0.558516	0.292342	1.09812	0.652308	0.288613	0.0168055	-0.301621	0.387047	-0.249036	0.00265612	0.0168737	-0.192243	0.500827	-0.0456454	-0.546473	0.00227439	0.0304616
995	sp|P23743|DGKA_HUMAN	sp|P23743|DGKA_HUMAN	9	sp|P23743|DGKA_HUMAN Diacylglycerol kinase alpha OS=Homo sapiens OX=9606 GN=DGKA PE=1 SV=3	-0.401729	-0.949135	sp|P23743|DGKA_HUMAN	-0.547406	-0.871902	-0.222911	-0.675432	-3.61711	0.00278931	0.0343041	0	129020000	60138000	96244000	61399000	129180000	146070000	94824000	108430000	89699000	82310000	85484000	63069000	93427000	104240000	-0.35346	-0.584465	-0.0448206	-0.300734	-0.967275	-0.128782	-0.432563	-0.847452	-1.09806	-1.22393	-0.906663	-1.23692	-0.567208	-0.763719	-0.401729	-0.949135	-0.547406	0.00278931	0.0343041
4559	sp|Q9Y584|TIM22_HUMAN	sp|Q9Y584|TIM22_HUMAN	2	sp|Q9Y584|TIM22_HUMAN Mitochondrial import inner membrane translocase subunit Tim22 OS=Homo sapiens OX=9606 GN=TIMM22 PE=1 SV=2	-2.42348	-2.98583	sp|Q9Y584|TIM22_HUMAN	-0.562354	-0.792294	-0.332414	-2.70466	-5.24391	0.000122984	0.00518876	0	33213000	16296000	20469000	11516000	55983000	25399000	23525000	22354000	21550000	25074000	22054000	22134000	16586000	22904000	-2.31165	-2.44759	-2.22751	-2.72493	-2.18183	-2.64706	-2.42379	-3.13835	-3.17018	-2.97936	-2.85842	-2.75933	-3.04862	-2.94658	-2.42348	-2.98583	-0.562354	0.000122984	0.00518876
2867	sp|Q8N3D4|EH1L1_HUMAN	sp|Q8N3D4|EH1L1_HUMAN	3	sp|Q8N3D4|EH1L1_HUMAN EH domain-binding protein 1-like protein 1 OS=Homo sapiens OX=9606 GN=EHBP1L1 PE=1 SV=2	-2.42754	-2.9899	sp|Q8N3D4|EH1L1_HUMAN	-0.56236	-0.88514	-0.239579	-2.70872	-3.73566	0.00220469	0.0301094	0	25006000	19391000	18011000	14183000	48586000	26817000	25935000	33720000	27519000	22260000	16468000	16588000	12892000	30182000	-2.72122	-2.19947	-2.40789	-2.42321	-2.38768	-2.56886	-2.28447	-2.54196	-2.81492	-3.15516	-3.27917	-3.17869	-3.41029	-2.54911	-2.42754	-2.9899	-0.56236	0.00220469	0.0301094
2590	sp|Q6YP21|KAT3_HUMAN	sp|Q6YP21|KAT3_HUMAN	9	sp|Q6YP21|KAT3_HUMAN Kynurenine--oxoglutarate transaminase 3 OS=Homo sapiens OX=9606 GN=KYAT3 PE=1 SV=1	0.542867	-0.027991	sp|Q6YP21|KAT3_HUMAN	-0.570858	-0.862648	-0.279067	0.257438	-4.19486	0.00089387	0.0177941	0	275630000	118470000	180720000	107460000	314370000	199840000	205840000	130200000	170770000	199240000	180150000	145720000	162890000	188330000	0.741913	0.382991	0.843583	0.509995	0.324565	0.322411	0.674609	-0.582011	-0.162521	0.0815986	0.167235	-0.0193268	0.230771	0.0883177	0.542867	-0.027991	-0.570858	0.00089387	0.0177941
627	sp|P00568|KAD1_HUMAN	sp|P00568|KAD1_HUMAN	19	sp|P00568|KAD1_HUMAN Adenylate kinase isoenzyme 1 OS=Homo sapiens OX=9606 GN=AK1 PE=1 SV=3	4.06828	3.49692	sp|P00568|KAD1_HUMAN	-0.571359	-0.858207	-0.284512	3.7826	-4.27089	0.000771023	0.0162578	0	3505500000	1318300000	1295300000	1544000000	4718700000	2308300000	2346600000	1879000000	2023100000	2190100000	1669200000	1879900000	1709700000	1953400000	4.41152	3.82099	3.6207	4.37011	4.25909	3.84458	4.15096	3.29068	3.42943	3.6218	3.37442	3.69874	3.6056	3.45776	4.06828	3.49692	-0.571359	0.000771023	0.0162578
273	sp|O43310|CTIF_HUMAN	sp|O43310|CTIF_HUMAN	2	sp|O43310|CTIF_HUMAN CBP80/20-dependent translation initiation factor OS=Homo sapiens OX=9606 GN=CTIF PE=1 SV=1	-3.47818	-4.05008	sp|O43310|CTIF_HUMAN	-0.571892	-0.908534	-0.235251	-3.78613	-3.66886	0.00281911	0.0344197	1	11626000	6826400	10194000	7935800	NA	14403000	11752000	12541000	12496000	9080900	7311800	9623000	9493000	13924000	-3.82637	-3.68915	-3.21045	-3.26426	NA	-3.46367	-3.4152	-3.97689	-3.96203	-4.47929	-4.44883	-3.97038	-3.84963	-3.6635	-3.47818	-4.05008	-0.571892	0.00281911	0.0344197
2806	sp|Q8IXK0|PHC2_HUMAN	sp|Q8IXK0|PHC2_HUMAN	2	sp|Q8IXK0|PHC2_HUMAN Polyhomeotic-like protein 2 OS=Homo sapiens OX=9606 GN=PHC2 PE=1 SV=1	-1.47914	-2.05344	sp|Q8IXK0|PHC2_HUMAN	-0.574301	-0.863064	-0.285537	-1.76629	-4.26439	0.00078081	0.0163033	0	37740000	31673000	42141000	27843000	113430000	55616000	48276000	41610000	48072000	45752000	40347000	32358000	35832000	47260000	-2.12727	-1.49935	-1.20931	-1.44618	-1.15614	-1.51881	-1.39691	-2.23694	-2.00439	-2.0912	-1.98827	-2.20721	-1.94289	-1.90317	-1.47914	-2.05344	-0.574301	0.00078081	0.0163033
358	sp|O60563|CCNT1_HUMAN	sp|O60563|CCNT1_HUMAN	6	sp|O60563|CCNT1_HUMAN Cyclin-T1 OS=Homo sapiens OX=9606 GN=CCNT1 PE=1 SV=1	-0.730018	-1.3046	sp|O60563|CCNT1_HUMAN	-0.574578	-0.933766	-0.21539	-1.01731	-3.42995	0.00404757	0.043119	0	103230000	71658000	72168000	33532000	144940000	80283000	79609000	65471000	79843000	99906000	80152000	41582000	66815000	64403000	-0.675261	-0.334385	-0.450753	-1.17689	-0.800068	-0.990381	-0.682396	-1.57936	-1.26719	-0.937815	-0.999443	-1.84256	-1.04846	-1.45736	-0.730018	-1.3046	-0.574578	0.00404757	0.043119
1680	sp|P63096|GNAI1_HUMAN	sp|P63096|GNAI1_HUMAN	9	sp|P63096|GNAI1_HUMAN Guanine nucleotide-binding protein G(i) subunit alpha-1 OS=Homo sapiens OX=9606 GN=GNAI1 PE=1 SV=2	-1.89937	-2.47627	sp|P63096|GNAI1_HUMAN	-0.576898	-0.924796	-0.229001	-2.18782	-3.55557	0.00315225	0.0365661	0	45889000	29409000	25820000	21926000	62740000	31160000	36819000	35172000	22296000	29832000	34120000	31591000	33324000	31431000	-1.84515	-1.60518	-1.90004	-1.79222	-2.01631	-2.35278	-1.78391	-2.4808	-3.12073	-2.72276	-2.22976	-2.24209	-2.04705	-2.4907	-1.89937	-2.47627	-0.576898	0.00315225	0.0365661
767	sp|P0DPB5|RPC22_HUMAN	sp|P0DPB5|RPC22_HUMAN	2	sp|P0DPB5|RPC22_HUMAN Protein POLR1D, isoform 2 OS=Homo sapiens OX=9606 GN=POLR1D PE=1 SV=1	-3.58363	-4.16257	sp|P0DPB5|RPC22_HUMAN	-0.578936	-0.907871	-0.250001	-3.85083	-3.80105	0.00219081	0.0300071	1	9588900	9070700	11542000	6143900	20145000	12002000	10079000	NA	10681000	12949000	9120000	7356500	8068800	9229900	-4.10435	-3.28356	-3.03534	-3.63495	-3.66646	-3.72618	-3.63457	NA	-4.19007	-3.95525	-4.13049	-4.36086	-4.08297	-4.25577	-3.58363	-4.16257	-0.578936	0.00219081	0.0300071
366	sp|O60664|PLIN3_HUMAN	sp|O60664|PLIN3_HUMAN	17	sp|O60664|PLIN3_HUMAN Perilipin-3 OS=Homo sapiens OX=9606 GN=PLIN3 PE=1 SV=3	2.95944	2.37996	sp|O60664|PLIN3_HUMAN	-0.579482	-0.880847	-0.278116	2.6697	-4.12294	0.00102853	0.019008	0	1293300000	564380000	858730000	616430000	2933300000	1000900000	938230000	860250000	1116300000	991980000	760000000	683300000	808120000	995400000	2.97264	2.61046	3.04112	3.04017	3.56855	2.64169	2.84145	2.15724	2.56545	2.45216	2.241	2.22733	2.5299	2.48662	2.95944	2.37996	-0.579482	0.00102853	0.019008
2658	sp|Q7Z2Z2|EFL1_HUMAN	sp|Q7Z2Z2|EFL1_HUMAN	30	sp|Q7Z2Z2|EFL1_HUMAN Elongation factor-like GTPase 1 OS=Homo sapiens OX=9606 GN=EFL1 PE=1 SV=2	2.49186	1.91231	sp|Q7Z2Z2|EFL1_HUMAN	-0.579556	-0.821226	-0.337885	2.20208	-5.142	0.000148246	0.00566226	0	928310000	650230000	670950000	361850000	1123900000	997680000	670950000	617960000	693870000	683370000	646280000	522460000	561430000	750990000	2.49416	2.81251	2.69318	2.26856	2.17509	2.63705	2.36248	1.67733	1.87456	1.90181	2.0075	1.83712	2.00706	2.08077	2.49186	1.91231	-0.579556	0.000148246	0.00566226
2074	sp|Q14247|SRC8_HUMAN	sp|Q14247|SRC8_HUMAN	38	sp|Q14247|SRC8_HUMAN Src substrate cortactin OS=Homo sapiens OX=9606 GN=CTTN PE=1 SV=2	4.38604	3.80371	sp|Q14247|SRC8_HUMAN	-0.582327	-0.811789	-0.352865	4.09488	-5.44147	8.59567e-05	0.00407904	0	3442800000	2003600000	2137100000	1773500000	4028300000	3568200000	2996300000	2231700000	2334000000	2697700000	2307300000	1937600000	2361100000	2594300000	4.38547	4.41829	4.32671	4.57083	4.02932	4.47156	4.5001	3.54025	3.63715	3.92964	3.84078	3.7427	4.06899	3.86649	4.38604	3.80371	-0.582327	8.59567e-05	0.00407904
3591	sp|Q9BUE6|ISCA1_HUMAN	sp|Q9BUE6|ISCA1_HUMAN	3	sp|Q9BUE6|ISCA1_HUMAN Iron-sulfur cluster assembly 1 homolog, mitochondrial OS=Homo sapiens OX=9606 GN=ISCA1 PE=1 SV=1	-0.855951	-1.44762	sp|Q9BUE6|ISCA1_HUMAN	-0.59167	-0.888516	-0.294824	-1.15179	-4.27375	0.00076676	0.0162578	0	104390000	56284000	47660000	52329000	133950000	67989000	66414000	69364000	61221000	72391000	44937000	66035000	64923000	63473000	-0.659137	-0.67897	-1.03578	-0.532257	-0.914606	-1.22965	-0.941262	-1.49556	-1.65307	-1.41357	-1.83306	-1.1701	-1.08969	-1.47831	-0.855951	-1.44762	-0.59167	0.00076676	0.0162578
2212	sp|Q15526|SURF1_HUMAN	sp|Q15526|SURF1_HUMAN	2	sp|Q15526|SURF1_HUMAN Surfeit locus protein 1 OS=Homo sapiens OX=9606 GN=SURF1 PE=1 SV=1	-2.04242	-2.64564	sp|Q15526|SURF1_HUMAN	-0.603223	-0.912832	-0.293613	-2.34403	-4.17757	0.000924492	0.0180798	0	37744000	24383000	26006000	22547000	45524000	31296000	35730000	25169000	30377000	25867000	29035000	27499000	27355000	26953000	-2.12712	-1.8726	-1.88992	-1.75177	-2.48223	-2.34651	-1.82679	-2.96628	-2.67135	-2.93337	-2.46224	-2.44378	-2.33039	-2.7121	-2.04242	-2.64564	-0.603223	0.000924492	0.0180798
679	sp|P05556|ITB1_HUMAN	sp|P05556|ITB1_HUMAN	28	sp|P05556|ITB1_HUMAN Integrin beta-1 OS=Homo sapiens OX=9606 GN=ITGB1 PE=1 SV=2	5.251	4.64338	sp|P05556|ITB1_HUMAN	-0.607622	-0.809333	-0.405911	4.94719	-6.45898	1.47851e-05	0.0011976	0	5653000000	3688100000	3868600000	3371200000	9033000000	6898800000	4494900000	4188900000	4620900000	5114800000	3946500000	3556400000	3674400000	4324100000	5.10106	5.28893	5.16348	5.50118	5.2023	5.42062	5.07943	4.45375	4.62957	4.87442	4.61402	4.62565	4.70385	4.6024	5.251	4.64338	-0.607622	1.47851e-05	0.0011976
4479	sp|Q9Y305|ACOT9_HUMAN	sp|Q9Y305|ACOT9_HUMAN	13	sp|Q9Y305|ACOT9_HUMAN Acyl-coenzyme A thioesterase 9, mitochondrial OS=Homo sapiens OX=9606 GN=ACOT9 PE=1 SV=2	1.879	1.26209	sp|Q9Y305|ACOT9_HUMAN	-0.616907	-0.859169	-0.374646	1.57054	-5.46005	8.31322e-05	0.00404266	0	772920000	302230000	356480000	288250000	1054700000	511580000	423410000	421980000	391340000	432950000	403040000	387470000	403050000	401690000	2.22982	1.71931	1.80146	1.93918	2.08278	1.67555	1.70488	1.12392	1.04241	1.22777	1.32726	1.40253	1.5313	1.17945	1.879	1.26209	-0.616907	8.31322e-05	0.00404266
743	sp|P09110|THIK_HUMAN	sp|P09110|THIK_HUMAN	14	sp|P09110|THIK_HUMAN 3-ketoacyl-CoA thiolase, peroxisomal OS=Homo sapiens OX=9606 GN=ACAA1 PE=1 SV=2	1.70826	1.08666	sp|P09110|THIK_HUMAN	-0.621601	-0.901642	-0.341559	1.39746	-4.75937	0.000302521	0.00879639	0	559430000	326500000	381110000	249420000	667310000	512230000	405870000	481510000	304120000	301830000	357680000	315620000	330950000	472160000	1.76336	1.82953	1.89566	1.72961	1.41787	1.67738	1.64444	1.31537	0.676021	0.694998	1.15526	1.10433	1.24838	1.41228	1.70826	1.08666	-0.621601	0.000302521	0.00879639
2923	sp|Q8NBQ5|DHB11_HUMAN	sp|Q8NBQ5|DHB11_HUMAN	11	sp|Q8NBQ5|DHB11_HUMAN Estradiol 17-beta-dehydrogenase 11 OS=Homo sapiens OX=9606 GN=HSD17B11 PE=1 SV=3	1.40705	0.780367	sp|Q8NBQ5|DHB11_HUMAN	-0.626682	-0.863894	-0.389469	1.09371	-5.66462	5.77189e-05	0.00312081	0	426380000	236310000	269270000	164690000	673590000	529920000	346290000	321430000	334240000	301020000	277370000	307810000	265740000	240250000	1.37146	1.36824	1.40585	1.1284	1.43148	1.72625	1.41767	0.729053	0.81324	0.691029	0.788936	1.0679	0.933361	0.439049	1.40705	0.780367	-0.626682	5.77189e-05	0.00312081
4160	sp|Q9P0M6|H2AW_HUMAN	sp|Q9P0M6|H2AW_HUMAN	9	sp|Q9P0M6|H2AW_HUMAN Core histone macro-H2A.2 OS=Homo sapiens OX=9606 GN=H2AFY2 PE=1 SV=3	0.400442	-0.233283	sp|Q9P0M6|H2AW_HUMAN	-0.633726	-0.987756	-0.279695	0.0835794	-3.83814	0.00180012	0.0268962	0	190390000	142000000	164870000	90900000	349170000	164360000	176350000	152350000	184490000	187070000	139150000	154780000	131430000	88256000	0.208023	0.641497	0.714155	0.267586	0.477065	0.0410433	0.453727	-0.354084	-0.0502358	-0.0114807	-0.204778	0.06837	-0.0772851	-1.00349	0.400442	-0.233283	-0.633726	0.00180012	0.0268962
4364	sp|Q9ULX9|MAFF_HUMAN	sp|Q9ULX9|MAFF_HUMAN	4	sp|Q9ULX9|MAFF_HUMAN Transcription factor MafF OS=Homo sapiens OX=9606 GN=MAFF PE=1 SV=2	-1.10382	-1.73839	sp|Q9ULX9|MAFF_HUMAN	-0.634563	-0.936765	-0.332362	-1.42111	-4.50234	0.000493337	0.0124591	0	62399000	50861000	61250000	30760000	92519000	73732000	65889000	48881000	61685000	64070000	49857000	51179000	44407000	42077000	-1.40168	-0.823534	-0.682043	-1.30186	-1.45212	-1.11291	-0.952599	-2.0033	-1.64209	-1.59389	-1.68338	-1.54064	-1.6349	-2.0705	-1.10382	-1.73839	-0.634563	0.000493337	0.0124591
578	sp|O95639|CPSF4_HUMAN	sp|O95639|CPSF4_HUMAN	9	sp|O95639|CPSF4_HUMAN Cleavage and polyadenylation specificity factor subunit 4 OS=Homo sapiens OX=9606 GN=CPSF4 PE=1 SV=1	-0.486841	-1.12265	sp|O95639|CPSF4_HUMAN	-0.63581	-1.04348	-0.228142	-0.804746	-3.34412	0.00480236	0.0482133	0	76962000	61786000	112710000	51082000	236350000	116070000	72087000	97659000	106360000	81188000	93106000	73551000	50429000	61865000	-1.099	-0.545889	0.177867	-0.567191	-0.0897833	-0.459719	-0.824176	-0.999235	-0.850507	-1.2442	-0.783624	-1.01338	-1.45235	-1.51527	-0.486841	-1.12265	-0.63581	0.00480236	0.0482133
2101	sp|Q14677|EPN4_HUMAN	sp|Q14677|EPN4_HUMAN	16	sp|Q14677|EPN4_HUMAN Clathrin interactor 1 OS=Homo sapiens OX=9606 GN=CLINT1 PE=1 SV=1	1.53681	0.898114	sp|Q14677|EPN4_HUMAN	-0.638701	-1.03213	-0.245271	1.21746	-3.48089	0.00365716	0.0403318	0	476520000	232510000	480610000	151810000	998110000	439740000	294680000	361210000	370400000	325340000	311050000	236730000	355890000	273800000	1.53189	1.3451	2.22274	1.01045	2.00268	1.45772	1.18713	0.898327	0.9625	0.805769	0.954029	0.68616	1.35267	0.627344	1.53681	0.898114	-0.638701	0.00365716	0.0403318
1487	sp|P53814|SMTN_HUMAN	sp|P53814|SMTN_HUMAN	30	sp|P53814|SMTN_HUMAN Smoothelin OS=Homo sapiens OX=9606 GN=SMTN PE=1 SV=7	2.60381	1.96116	sp|P53814|SMTN_HUMAN	-0.642656	-1.01775	-0.267565	2.28249	-3.67369	0.00249292	0.0322637	0	640260000	806080000	766060000	398180000	1110700000	1045000000	1048800000	662620000	786010000	784850000	662370000	545900000	607870000	585640000	1.9581	3.11908	2.8801	2.40714	2.15793	2.70376	3.00059	1.77856	2.05573	2.10628	2.04292	1.90093	2.12114	1.72254	2.60381	1.96116	-0.642656	0.00249292	0.0322637
1463	sp|P52789|HXK2_HUMAN	sp|P52789|HXK2_HUMAN	39	sp|P52789|HXK2_HUMAN Hexokinase-2 OS=Homo sapiens OX=9606 GN=HK2 PE=1 SV=2	3.41911	2.77459	sp|P52789|HXK2_HUMAN	-0.644519	-0.871682	-0.417355	3.09685	-6.08355	2.78385e-05	0.00192331	0	1712700000	1015300000	1306400000	695010000	2146600000	2179100000	1371800000	1293700000	1210400000	1150100000	1184100000	979950000	1087400000	1180200000	3.37795	3.44835	3.63273	3.21395	3.115	3.76166	3.3841	2.74921	2.68305	2.67059	2.87978	2.75156	2.956	2.73193	3.41911	2.77459	-0.644519	2.78385e-05	0.00192331
2696	sp|Q86SF2|GALT7_HUMAN	sp|Q86SF2|GALT7_HUMAN	9	sp|Q86SF2|GALT7_HUMAN N-acetylgalactosaminyltransferase 7 OS=Homo sapiens OX=9606 GN=GALNT7 PE=1 SV=1	-0.976986	-1.62493	sp|Q86SF2|GALT7_HUMAN	-0.647942	-1.01726	-0.278622	-1.30096	-3.76179	0.00209352	0.0297031	0	77573000	45126000	60649000	35428000	76709000	95411000	90596000	66257000	52457000	57441000	52246000	58932000	37096000	70109000	-1.08759	-0.994244	-0.695947	-1.09722	-1.72432	-0.741866	-0.497719	-1.56204	-1.87755	-1.75519	-1.61596	-1.33556	-1.89313	-1.33507	-0.976986	-1.62493	-0.647942	0.00209352	0.0297031
613	sp|O96019|ACL6A_HUMAN	sp|O96019|ACL6A_HUMAN	11	sp|O96019|ACL6A_HUMAN Actin-like protein 6A OS=Homo sapiens OX=9606 GN=ACTL6A PE=1 SV=1	2.2303	1.56945	sp|O96019|ACL6A_HUMAN	-0.660851	-0.92294	-0.398763	1.89987	-5.4065	9.15489e-05	0.00421692	0	636880000	382930000	503390000	414550000	1329200000	912450000	493540000	504670000	647130000	483380000	452990000	408750000	452740000	603110000	1.95046	2.05701	2.28804	2.4655	2.41879	2.5085	1.92381	1.38353	1.77323	1.39049	1.49557	1.48026	1.69819	1.76488	2.2303	1.56945	-0.660851	9.15489e-05	0.00421692
4182	sp|Q9P2B4|CT2NL_HUMAN	sp|Q9P2B4|CT2NL_HUMAN	9	sp|Q9P2B4|CT2NL_HUMAN CTTNBP2 N-terminal-like protein OS=Homo sapiens OX=9606 GN=CTTNBP2NL PE=1 SV=2	-0.280564	-0.943556	sp|Q9P2B4|CT2NL_HUMAN	-0.662992	-0.999398	-0.326586	-0.61206	-4.22576	0.000841686	0.0173264	0	119660000	79310000	69556000	84407000	156890000	124210000	135510000	115210000	100970000	66924000	81313000	87143000	80306000	97513000	-0.462137	-0.189613	-0.502733	0.160242	-0.68499	-0.362148	0.0774324	-0.759461	-0.926073	-1.52953	-0.978726	-0.766836	-0.784449	-0.859813	-0.280564	-0.943556	-0.662992	0.000841686	0.0173264
1759	sp|Q00535|CDK5_HUMAN	sp|Q00535|CDK5_HUMAN	11	sp|Q00535|CDK5_HUMAN Cyclin-dependent-like kinase 5 OS=Homo sapiens OX=9606 GN=CDK5 PE=1 SV=3	0.856774	0.19151	sp|Q00535|CDK5_HUMAN	-0.665264	-0.968734	-0.361794	0.524142	-4.70045	0.000338183	0.00957097	0	257700000	114530000	191260000	152200000	524650000	248910000	335670000	246180000	231890000	206310000	168420000	175390000	138640000	212700000	0.644852	0.334729	0.923511	1.01416	1.0685	0.638494	1.37317	0.342111	0.282022	0.133095	0.0702416	0.25012	-0.000621109	0.263604	0.856774	0.19151	-0.665264	0.000338183	0.00957097
1081	sp|P30048|PRDX3_HUMAN	sp|P30048|PRDX3_HUMAN	9	sp|P30048|PRDX3_HUMAN Thioredoxin-dependent peroxide reductase, mitochondrial OS=Homo sapiens OX=9606 GN=PRDX3 PE=1 SV=3	2.79129	2.11941	sp|P30048|PRDX3_HUMAN	-0.671883	-1.06589	-0.277871	2.45535	-3.65633	0.00258034	0.0329275	0	1645200000	541290000	649490000	437080000	3007200000	872070000	703780000	862440000	832870000	965160000	614400000	584650000	574910000	786320000	3.31992	2.55086	2.64734	2.54215	3.60469	2.44334	2.43072	2.16093	2.13987	2.41169	1.93462	2.00063	2.04112	2.14699	2.79129	2.11941	-0.671883	0.00258034	0.0329275
1010	sp|P25398|RS12_HUMAN	sp|P25398|RS12_HUMAN	6	sp|P25398|RS12_HUMAN 40S ribosomal protein S12 OS=Homo sapiens OX=9606 GN=RPS12 PE=1 SV=3	2.34365	1.66141	sp|P25398|RS12_HUMAN	-0.682244	-1.03461	-0.32988	2.00253	-4.15153	0.000972666	0.0185003	0	1154300000	371350000	536160000	332840000	1619300000	834850000	510910000	586320000	525450000	506760000	740900000	379900000	515660000	551030000	2.80857	2.01319	2.37696	2.14752	2.70554	2.38055	1.97322	1.60108	1.47058	1.46024	2.20433	1.37384	1.88499	1.63479	2.34365	1.66141	-0.682244	0.000972666	0.0185003
3212	sp|Q96AE4|FUBP1_HUMAN	sp|Q96AE4|FUBP1_HUMAN	10	sp|Q96AE4|FUBP1_HUMAN Far upstream element-binding protein 1 OS=Homo sapiens OX=9606 GN=FUBP1 PE=1 SV=3	0.260739	-0.427043	sp|Q96AE4|FUBP1_HUMAN	-0.687782	-0.960553	-0.415011	-0.0831518	-5.40646	9.1555e-05	0.00421692	0	237300000	109170000	134710000	85866000	301400000	198130000	115180000	151970000	152890000	106990000	152020000	99524000	101020000	137420000	0.525846	0.266338	0.429283	0.185065	0.263366	0.31004	-0.154764	-0.357707	-0.323224	-0.836645	-0.0773443	-0.573686	-0.455042	-0.365651	0.260739	-0.427043	-0.687782	9.1555e-05	0.00421692
2054	sp|Q14151|SAFB2_HUMAN	sp|Q14151|SAFB2_HUMAN	19	sp|Q14151|SAFB2_HUMAN Scaffold attachment factor B2 OS=Homo sapiens OX=9606 GN=SAFB2 PE=1 SV=1	-1.09019	-1.77848	sp|Q14151|SAFB2_HUMAN	-0.688291	-1.01723	-0.359348	-1.43433	-4.48654	0.000508521	0.0125739	0	74293000	51985000	52899000	35416000	81517000	84919000	57103000	49177000	53981000	54439000	50461000	38787000	61137000	44227000	-1.14993	-0.792344	-0.888724	-1.09771	-1.63602	-0.909566	-1.15703	-1.99454	-1.83594	-1.83446	-1.66604	-1.94373	-1.17594	-1.99872	-1.09019	-1.77848	-0.688291	0.000508521	0.0125739
989	sp|P23497|SP100_HUMAN	sp|P23497|SP100_HUMAN	10	sp|P23497|SP100_HUMAN Nuclear autoantigen Sp-100 OS=Homo sapiens OX=9606 GN=SP100 PE=1 SV=3	-0.698628	-1.39332	sp|P23497|SP100_HUMAN	-0.694687	-1.11561	-0.273766	-1.04597	-3.53875	0.00325948	0.0374402	0	93092000	65991000	87255000	76190000	115410000	70589000	57941000	65701000	78124000	87060000	50472000	50226000	60402000	71238000	-0.824427	-0.451941	-0.183076	0.0118927	-1.131	-1.17562	-1.13622	-1.57427	-1.29881	-1.14107	-1.66572	-1.56797	-1.19331	-1.31206	-0.698628	-1.39332	-0.694687	0.00325948	0.0374402
1240	sp|P42574|CASP3_HUMAN	sp|P42574|CASP3_HUMAN	4	sp|P42574|CASP3_HUMAN Caspase-3 OS=Homo sapiens OX=9606 GN=CASP3 PE=1 SV=2	-0.0983928	-0.796809	sp|P42574|CASP3_HUMAN	-0.698416	-1.05713	-0.339705	-0.447601	-4.17475	0.000929595	0.0180798	0	173500000	97835000	103140000	67600000	147430000	211670000	97426000	98897000	94693000	130430000	102710000	72265000	79164000	121160000	0.0739727	0.109917	0.0527541	-0.161373	-0.775326	0.4052	-0.393894	-0.98096	-1.01933	-0.544087	-0.642201	-1.03902	-0.805009	-0.547049	-0.0983928	-0.796809	-0.698416	0.000929595	0.0180798
911	sp|P18564|ITB6_HUMAN	sp|P18564|ITB6_HUMAN	2	sp|P18564|ITB6_HUMAN Integrin beta-6 OS=Homo sapiens OX=9606 GN=ITGB6 PE=1 SV=2	1.13616	0.437004	sp|P18564|ITB6_HUMAN	-0.699155	-1.02108	-0.377231	0.786582	-4.65673	0.000367432	0.010036	0	384770000	167620000	206200000	229790000	458130000	407960000	256680000	289490000	262910000	322670000	190370000	140790000	186000000	273390000	1.22328	0.878178	1.02956	1.61088	0.871567	1.34973	0.989916	0.577218	0.464447	0.793599	0.246726	-0.0693668	0.42122	0.625185	1.13616	0.437004	-0.699155	0.000367432	0.010036
904	sp|P18031|PTN1_HUMAN	sp|P18031|PTN1_HUMAN	21	sp|P18031|PTN1_HUMAN Tyrosine-protein phosphatase non-receptor type 1 OS=Homo sapiens OX=9606 GN=PTPN1 PE=1 SV=1	3.07591	2.37422	sp|P18031|PTN1_HUMAN	-0.70169	-0.920712	-0.482667	2.72507	-6.86937	7.56878e-06	0.000670908	0	1160000000	842910000	959960000	546460000	1995500000	1611700000	1150300000	1084300000	964800000	1069400000	748940000	702270000	786430000	834120000	2.81568	3.18283	3.19825	2.86566	3.00898	3.32747	3.13254	2.49305	2.35353	2.56315	2.21988	2.26714	2.49084	2.232	3.07591	2.37422	-0.70169	7.56878e-06	0.000670908
4474	sp|Q9Y2Z0|SGT1_HUMAN	sp|Q9Y2Z0|SGT1_HUMAN	23	sp|Q9Y2Z0|SGT1_HUMAN Protein SGT1 homolog OS=Homo sapiens OX=9606 GN=SUGT1 PE=1 SV=3	2.37102	1.66785	sp|Q9Y2Z0|SGT1_HUMAN	-0.703176	-0.97202	-0.434332	2.01944	-5.60822	6.37907e-05	0.00332987	0	649960000	570410000	552120000	359980000	1496400000	812310000	679380000	470210000	622180000	600560000	597700000	489940000	514910000	483130000	1.9798	2.62563	2.41832	2.26106	2.59089	2.34115	2.38032	1.28092	1.7161	1.71104	1.89492	1.74368	1.8829	1.44537	2.37102	1.66785	-0.703176	6.37907e-05	0.00332987
1065	sp|P29353|SHC1_HUMAN	sp|P29353|SHC1_HUMAN	9	sp|P29353|SHC1_HUMAN SHC-transforming protein 1 OS=Homo sapiens OX=9606 GN=SHC1 PE=1 SV=4	-0.202217	-0.91085	sp|P29353|SHC1_HUMAN	-0.708633	-1.00196	-0.415303	-0.556534	-5.17995	0.000138261	0.00548477	0	127720000	67032000	113740000	73786000	223390000	110410000	122170000	92441000	128370000	77266000	86778000	80454000	72792000	108270000	-0.368073	-0.429608	0.190694	-0.0345461	-0.171699	-0.531685	-0.0706025	-1.0789	-0.577214	-1.31732	-0.88502	-0.882952	-0.925469	-0.709079	-0.202217	-0.91085	-0.708633	0.000138261	0.00548477
4396	sp|Q9UPN3|MACF1_HUMAN	sp|Q9UPN3|MACF1_HUMAN	108	sp|Q9UPN3|MACF1_HUMAN Microtubule-actin cross-linking factor 1, isoforms 1/2/3/5 OS=Homo sapiens OX=9606 GN=MACF1 PE=1 SV=4	3.55158	2.83891	sp|Q9UPN3|MACF1_HUMAN	-0.712673	-1.00099	-0.424356	3.19525	-5.30007	0.00011102	0.00489725	0	2297200000	1265500000	1311500000	862940000	1939600000	2167900000	1396100000	1318300000	1446000000	1175600000	1167800000	907920000	1263800000	1219600000	3.80164	3.76267	3.63822	3.52742	2.96771	3.75424	3.40918	2.77654	2.94147	2.70297	2.85981	2.64056	3.1718	2.77923	3.55158	2.83891	-0.712673	0.00011102	0.00489725
4196	sp|Q9UBB4|ATX10_HUMAN	sp|Q9UBB4|ATX10_HUMAN	11	sp|Q9UBB4|ATX10_HUMAN Ataxin-10 OS=Homo sapiens OX=9606 GN=ATXN10 PE=1 SV=1	0.357476	-0.355868	sp|Q9UBB4|ATX10_HUMAN	-0.713344	-1.0436	-0.383093	0.000804139	-4.63144	0.000385532	0.0104695	0	187660000	132810000	154730000	127170000	279130000	186060000	130090000	198300000	163770000	136800000	92652000	139660000	90175000	140610000	0.187182	0.546027	0.624653	0.753921	0.151867	0.219559	0.0191239	0.0283374	-0.223337	-0.473668	-0.790666	-0.0810832	-0.618065	-0.332595	0.357476	-0.355868	-0.713344	0.000385532	0.0104695
500	sp|O94760|DDAH1_HUMAN	sp|O94760|DDAH1_HUMAN	14	sp|O94760|DDAH1_HUMAN N(G),N(G)-dimethylarginine dimethylaminohydrolase 1 OS=Homo sapiens OX=9606 GN=DDAH1 PE=1 SV=3	1.94195	1.22018	sp|O94760|DDAH1_HUMAN	-0.721777	-1.13723	-0.306322	1.58106	-3.72511	0.00225127	0.0303922	0	657510000	288240000	323200000	237680000	1874100000	570320000	476180000	615270000	408840000	495860000	281220000	352900000	307220000	385210000	1.99646	1.65169	1.66326	1.65978	2.91781	1.83202	1.87266	1.671	1.10597	1.42813	0.808795	1.26665	1.14157	1.11911	1.94195	1.22018	-0.721777	0.00225127	0.0303922
2737	sp|Q86WA8|LONP2_HUMAN	sp|Q86WA8|LONP2_HUMAN	14	sp|Q86WA8|LONP2_HUMAN Lon protease homolog 2, peroxisomal OS=Homo sapiens OX=9606 GN=LONP2 PE=1 SV=1	0.838973	0.102229	sp|Q86WA8|LONP2_HUMAN	-0.736744	-1.08311	-0.390374	0.470601	-4.56076	0.000441153	0.0116435	0	236870000	174880000	207770000	143990000	364450000	315740000	243850000	222520000	245690000	213210000	217670000	117910000	179020000	124620000	0.523229	0.938679	1.04026	0.933845	0.539278	0.980854	0.916669	0.195517	0.366018	0.181678	0.439779	-0.327215	0.366313	-0.50649	0.838973	0.102229	-0.736744	0.000441153	0.0116435
3150	sp|Q92805|GOGA1_HUMAN	sp|Q92805|GOGA1_HUMAN	3	sp|Q92805|GOGA1_HUMAN Golgin subfamily A member 1 OS=Homo sapiens OX=9606 GN=GOLGA1 PE=1 SV=3	1.59744	0.825607	sp|Q92805|GOGA1_HUMAN	-0.771831	-1.05559	-0.488075	1.21152	-5.83228	4.29853e-05	0.00257547	0	400970000	356750000	394640000	211370000	795890000	344020000	431060000	331410000	318330000	372660000	275930000	251650000	256480000	312600000	1.28279	1.95596	1.94485	1.48985	1.67382	1.10434	1.73046	0.773412	0.742375	1.00631	0.781438	0.775021	0.882447	0.818244	1.59744	0.825607	-0.771831	4.29853e-05	0.00257547
1391	sp|P50452|SPB8_HUMAN	sp|P50452|SPB8_HUMAN	13	sp|P50452|SPB8_HUMAN Serpin B8 OS=Homo sapiens OX=9606 GN=SERPINB8 PE=1 SV=2	0.533972	-0.244003	sp|P50452|SPB8_HUMAN	-0.777975	-1.07249	-0.483457	0.144984	-5.6639	5.77927e-05	0.00312081	0	238360000	150560000	148710000	139070000	222180000	237860000	200180000	158730000	161030000	163820000	129620000	121630000	109740000	173130000	0.532277	0.725019	0.568698	0.883488	-0.179588	0.573126	0.63478	-0.294568	-0.247853	-0.207475	-0.30698	-0.282053	-0.33619	-0.032902	0.533972	-0.244003	-0.777975	5.77927e-05	0.00312081
192	sp|O14975|S27A2_HUMAN	sp|O14975|S27A2_HUMAN	4	sp|O14975|S27A2_HUMAN Very long-chain acyl-CoA synthetase OS=Homo sapiens OX=9606 GN=SLC27A2 PE=1 SV=2	-0.678796	-1.46202	sp|O14975|S27A2_HUMAN	-0.783225	-1.23383	-0.332623	-1.07041	-3.72696	0.00224305	0.0303684	0	109510000	53049000	56865000	53255000	146330000	63236000	129780000	77504000	92638000	82031000	47658000	48298000	30501000	84154000	-0.590043	-0.763434	-0.786786	-0.50685	-0.786204	-1.33397	0.0157159	-1.33458	-1.05121	-1.22894	-1.74837	-1.62488	-2.17412	-1.07205	-0.678796	-1.46202	-0.783225	0.00224305	0.0303684
2237	sp|Q15785|TOM34_HUMAN	sp|Q15785|TOM34_HUMAN	18	sp|Q15785|TOM34_HUMAN Mitochondrial import receptor subunit TOM34 OS=Homo sapiens OX=9606 GN=TOMM34 PE=1 SV=2	4.0037	3.21947	sp|Q15785|TOM34_HUMAN	-0.784234	-1.01034	-0.558127	3.61158	-7.43692	3.11164e-06	0.000339965	0	2333000000	1625100000	1431500000	1423800000	4745400000	2344500000	2015600000	1764900000	1697300000	1931700000	1440700000	1335500000	1415100000	1449200000	3.82396	4.11954	3.76167	4.25272	4.26729	3.86698	3.93376	3.1998	3.1743	3.43639	3.16234	3.20163	3.33412	3.02769	4.0037	3.21947	-0.784234	3.11164e-06	0.000339965
3776	sp|Q9H2W6|RM46_HUMAN	sp|Q9H2W6|RM46_HUMAN	2	sp|Q9H2W6|RM46_HUMAN 39S ribosomal protein L46, mitochondrial OS=Homo sapiens OX=9606 GN=MRPL46 PE=1 SV=1	-2.43688	-3.23756	sp|Q9H2W6|RM46_HUMAN	-0.800676	-1.18019	-0.421165	-2.83722	-4.5237	0.000473563	0.0120913	0	33623000	15673000	18023000	12291000	73521000	27223000	16971000	26081000	13994000	20129000	20938000	13409000	14333000	22573000	-2.29395	-2.50321	-2.40695	-2.63059	-1.78598	-2.54722	-2.89027	-2.91464	-3.79752	-3.30377	-2.93322	-3.48801	-3.25819	-2.96755	-2.43688	-3.23756	-0.800676	0.000473563	0.0120913
199	sp|O15020|SPTN2_HUMAN	sp|O15020|SPTN2_HUMAN	26	sp|O15020|SPTN2_HUMAN Spectrin beta chain, non-erythrocytic 2 OS=Homo sapiens OX=9606 GN=SPTBN2 PE=1 SV=3	0.870282	0.0651242	sp|O15020|SPTN2_HUMAN	-0.805157	-1.24351	-0.366806	0.467703	-3.93839	0.00147721	0.0237062	0	298780000	219230000	168680000	148140000	333380000	299150000	247540000	170570000	371700000	123530000	177180000	128200000	165890000	190940000	0.858289	1.26119	0.746369	0.975001	0.409847	0.903157	0.938123	-0.190198	0.96759	-0.624356	0.143287	-0.205566	0.256969	0.108144	0.870282	0.0651242	-0.805157	0.00147721	0.0237062
2673	sp|Q7Z4S6|KI21A_HUMAN	sp|Q7Z4S6|KI21A_HUMAN	7	sp|Q7Z4S6|KI21A_HUMAN Kinesin-like protein KIF21A OS=Homo sapiens OX=9606 GN=KIF21A PE=1 SV=2	-1.19459	-2.00871	sp|Q7Z4S6|KI21A_HUMAN	-0.814125	-1.15046	-0.477794	-1.60165	-5.1902	0.000135687	0.00548477	0	76105000	39841000	45498000	22575000	95349000	85688000	67465000	41807000	52224000	56226000	53425000	31620000	26389000	45635000	-1.11515	-1.17198	-1.10124	-1.74997	-1.40836	-0.896588	-0.918833	-2.23009	-1.88402	-1.78676	-1.58381	-2.24075	-2.382	-1.95358	-1.19459	-2.00871	-0.814125	0.000135687	0.00548477
3331	sp|Q96II8|LRCH3_HUMAN	sp|Q96II8|LRCH3_HUMAN	4	sp|Q96II8|LRCH3_HUMAN Leucine-rich repeat and calponin homology domain-containing protein 3 OS=Homo sapiens OX=9606 GN=LRCH3 PE=1 SV=2	-2.76869	-3.58685	sp|Q96II8|LRCH3_HUMAN	-0.818159	-1.31934	-0.316981	-3.20924	-3.52557	0.00370959	0.0407188	1	13199000	15877000	19044000	NA	54391000	24122000	13569000	17589000	17217000	15631000	13276000	8162600	13528000	17824000	-3.64326	-2.48475	-2.32925	NA	-2.22374	-2.72132	-3.20984	-3.48614	-3.49635	-3.67726	-3.58956	-4.20968	-3.34117	-3.3078	-2.76869	-3.58685	-0.818159	0.00370959	0.0407188
820	sp|P13196|HEM1_HUMAN	sp|P13196|HEM1_HUMAN	13	sp|P13196|HEM1_HUMAN 5-aminolevulinate synthase, nonspecific, mitochondrial OS=Homo sapiens OX=9606 GN=ALAS1 PE=1 SV=2	0.498133	-0.32554	sp|P13196|HEM1_HUMAN	-0.823673	-1.17294	-0.474408	0.0862962	-5.05663	0.000173542	0.00632015	0	204600000	203750000	121030000	88027000	278340000	272890000	195410000	120570000	125930000	158930000	149700000	130560000	123590000	145450000	0.311894	1.1567	0.278289	0.221067	0.147751	0.770898	0.60033	-0.693489	-0.605098	-0.252229	-0.0994988	-0.179045	-0.165574	-0.283846	0.498133	-0.32554	-0.823673	0.000173542	0.00632015
4400	sp|Q9UPN9|TRI33_HUMAN	sp|Q9UPN9|TRI33_HUMAN	14	sp|Q9UPN9|TRI33_HUMAN E3 ubiquitin-protein ligase TRIM33 OS=Homo sapiens OX=9606 GN=TRIM33 PE=1 SV=3	0.411061	-0.415974	sp|Q9UPN9|TRI33_HUMAN	-0.827035	-1.1906	-0.463465	-0.00245657	-4.87749	0.000242257	0.00795891	0	166170000	154340000	149240000	106210000	238420000	242210000	184270000	131390000	114940000	116320000	127000000	116040000	161580000	131930000	0.0116836	0.760401	0.573714	0.493047	-0.077117	0.599215	0.516482	-0.568812	-0.737781	-0.713169	-0.336397	-0.350458	0.21918	-0.42438	0.411061	-0.415974	-0.827035	0.000242257	0.00795891
680	sp|P06132|DCUP_HUMAN	sp|P06132|DCUP_HUMAN	9	sp|P06132|DCUP_HUMAN Uroporphyrinogen decarboxylase OS=Homo sapiens OX=9606 GN=UROD PE=1 SV=2	0.644101	-0.193589	sp|P06132|DCUP_HUMAN	-0.83769	-1.22282	-0.452557	0.225256	-4.66373	0.000362579	0.00997035	0	280210000	163540000	146780000	109280000	529980000	225780000	151220000	252430000	145860000	209200000	128320000	150850000	102400000	103820000	0.765694	0.843017	0.550278	0.534321	1.08318	0.498096	0.234122	0.378483	-0.391619	0.153638	-0.321501	0.0309771	-0.435565	-0.769534	0.644101	-0.193589	-0.83769	0.000362579	0.00997035
2299	sp|Q16881|TRXR1_HUMAN	sp|Q16881|TRXR1_HUMAN	26	sp|Q16881|TRXR1_HUMAN Thioredoxin reductase 1, cytoplasmic OS=Homo sapiens OX=9606 GN=TXNRD1 PE=1 SV=3	4.52196	3.67724	sp|Q16881|TRXR1_HUMAN	-0.844723	-1.24251	-0.446937	4.0996	-4.55329	0.000447493	0.0117448	0	3043100000	2164500000	1755300000	2856400000	6845300000	3829400000	2488300000	2482800000	1728600000	2989400000	1831400000	2158100000	1721600000	2377300000	4.20739	4.52851	4.0492	5.26117	4.79948	4.57326	4.23472	3.69493	3.20085	4.08127	3.50801	3.8994	3.61555	3.74066	4.52196	3.67724	-0.844723	0.000447493	0.0117448
3908	sp|Q9HD20|AT131_HUMAN	sp|Q9HD20|AT131_HUMAN	14	sp|Q9HD20|AT131_HUMAN Manganese-transporting ATPase 13A1 OS=Homo sapiens OX=9606 GN=ATP13A1 PE=1 SV=2	0.311275	-0.534718	sp|Q9HD20|AT131_HUMAN	-0.845993	-1.35212	-0.339867	-0.111721	-3.584	0.00297897	0.0353414	0	249710000	123810000	208890000	106720000	175920000	114180000	193710000	137860000	103550000	111200000	131590000	90344000	129860000	126870000	0.599403	0.4459	1.04784	0.499986	-0.518697	-0.483352	0.587848	-0.499075	-0.889412	-0.779648	-0.285251	-0.714387	-0.0945359	-0.480714	0.311275	-0.534718	-0.845993	0.00297897	0.0353414
2182	sp|Q15283|RASA2_HUMAN	sp|Q15283|RASA2_HUMAN	3	sp|Q15283|RASA2_HUMAN Ras GTPase-activating protein 2 OS=Homo sapiens OX=9606 GN=RASA2 PE=1 SV=3	-2.18295	-3.02899	sp|Q15283|RASA2_HUMAN	-0.846041	-1.18645	-0.505631	-2.63851	-5.36752	0.000126646	0.00518876	1	31899000	26070000	23185000	14435000	NA	37089000	23935000	22883000	26528000	31509000	16003000	13298000	19807000	22473000	-2.3699	-1.77714	-2.05182	-2.3977	NA	-2.10204	-2.39911	-3.10441	-2.86821	-2.64199	-3.32044	-3.5001	-2.79386	-2.97395	-2.18295	-3.02899	-0.846041	0.000126646	0.00518876
3811	sp|Q9H5Q4|TFB2M_HUMAN	sp|Q9H5Q4|TFB2M_HUMAN	6	sp|Q9H5Q4|TFB2M_HUMAN Dimethyladenosine transferase 2, mitochondrial OS=Homo sapiens OX=9606 GN=TFB2M PE=1 SV=1	0.585405	-0.262622	sp|Q9H5Q4|TFB2M_HUMAN	-0.848028	-1.28002	-0.416033	0.161392	-4.20913	0.000869372	0.0174987	0	193490000	151710000	161160000	114520000	549900000	192770000	174550000	190570000	171500000	178530000	172510000	153700000	62238000	118020000	0.23133	0.735876	0.682063	0.60216	1.13678	0.27056	0.439072	-0.029347	-0.156323	-0.0804865	0.104807	0.0581895	-1.15032	-0.584873	0.585405	-0.262622	-0.848028	0.000869372	0.0174987
720	sp|P08133|ANXA6_HUMAN	sp|P08133|ANXA6_HUMAN	40	sp|P08133|ANXA6_HUMAN Annexin A6 OS=Homo sapiens OX=9606 GN=ANXA6 PE=1 SV=3	4.31492	3.46465	sp|P08133|ANXA6_HUMAN	-0.850266	-1.04569	-0.654842	3.88979	-9.32902	2.13858e-07	5.64188e-05	0	3531300000	1817700000	1963500000	1277100000	5467800000	3199900000	2818400000	2148700000	2133600000	1966700000	1540200000	1436200000	1757600000	2136100000	4.4221	4.27935	4.20725	4.09522	4.47312	4.31474	4.41266	3.48526	3.50671	3.46291	3.25855	3.30732	3.64526	3.58655	4.31492	3.46465	-0.850266	2.13858e-07	5.64188e-05
1548	sp|P57729|RAB38_HUMAN	sp|P57729|RAB38_HUMAN	5	sp|P57729|RAB38_HUMAN Ras-related protein Rab-38 OS=Homo sapiens OX=9606 GN=RAB38 PE=1 SV=1	-2.09819	-2.94987	sp|P57729|RAB38_HUMAN	-0.851678	-1.38736	-0.315994	-2.52403	-3.409	0.00422004	0.0442539	0	39274000	27229000	20386000	10642000	68508000	23769000	55454000	18022000	18272000	22811000	22516000	25428000	19713000	31613000	-2.06978	-1.71507	-2.23323	-2.83925	-1.88856	-2.74254	-1.19889	-3.45086	-3.40994	-3.11905	-2.82855	-2.55762	-2.80068	-2.48238	-2.09819	-2.94987	-0.851678	0.00422004	0.0442539
3616	sp|Q9BVG9|PTSS2_HUMAN	sp|Q9BVG9|PTSS2_HUMAN	2	sp|Q9BVG9|PTSS2_HUMAN Phosphatidylserine synthase 2 OS=Homo sapiens OX=9606 GN=PTDSS2 PE=1 SV=1	-2.09582	-2.95428	sp|Q9BVG9|PTSS2_HUMAN	-0.858456	-1.32284	-0.394071	-2.52505	-3.96369	0.00140546	0.0233318	0	29626000	25012000	24464000	15802000	49882000	35244000	42165000	20490000	20419000	21646000	39586000	13406000	22615000	24277000	-2.47657	-1.83626	-1.97611	-2.26664	-2.34944	-2.17549	-1.59024	-3.26466	-3.24851	-3.19646	-2.0157	-3.48834	-2.60354	-2.86272	-2.09582	-2.95428	-0.858456	0.00140546	0.0233318
275	sp|O43318|M3K7_HUMAN	sp|O43318|M3K7_HUMAN	6	sp|O43318|M3K7_HUMAN Mitogen-activated protein kinase kinase kinase 7 OS=Homo sapiens OX=9606 GN=MAP3K7 PE=1 SV=1	-1.40974	-2.27333	sp|O43318|M3K7_HUMAN	-0.863587	-1.39549	-0.331683	-1.84153	-3.48123	0.0036547	0.0403318	0	34953000	84653000	31734000	25487000	98354000	61290000	41647000	36002000	34034000	46659000	35212000	28277000	25718000	47648000	-2.23797	-0.0965853	-1.60924	-1.57424	-1.36329	-1.37897	-1.6079	-2.44696	-2.50618	-2.06221	-2.18438	-2.40322	-2.41897	-1.8914	-1.40974	-2.27333	-0.863587	0.0036547	0.0403318
2232	sp|Q15738|NSDHL_HUMAN	sp|Q15738|NSDHL_HUMAN	13	sp|Q15738|NSDHL_HUMAN Sterol-4-alpha-carboxylate 3-dehydrogenase, decarboxylating OS=Homo sapiens OX=9606 GN=NSDHL PE=1 SV=2	0.561603	-0.307129	sp|Q15738|NSDHL_HUMAN	-0.868732	-1.10441	-0.633056	0.127237	-7.9037	1.54524e-06	0.000245713	0	242910000	151160000	131100000	110420000	405300000	180150000	230130000	143200000	149240000	155870000	148330000	107500000	124850000	139760000	0.559563	0.730694	0.390981	0.549353	0.693593	0.173092	0.833948	-0.443941	-0.358333	-0.28094	-0.112743	-0.461601	-0.151014	-0.341329	0.561603	-0.307129	-0.868732	1.54524e-06	0.000245713
3769	sp|Q9H2K0|IF3M_HUMAN	sp|Q9H2K0|IF3M_HUMAN	3	sp|Q9H2K0|IF3M_HUMAN Translation initiation factor IF-3, mitochondrial OS=Homo sapiens OX=9606 GN=MTIF3 PE=1 SV=4	-3.45277	-4.32438	sp|Q9H2K0|IF3M_HUMAN	-0.871614	-1.38508	-0.358144	-3.88858	-3.63973	0.00266675	0.033409	0	11680000	13383000	12425000	4942400	33987000	10060000	8652500	11241000	8232800	7659600	5958200	9624900	8778100	9863200	-3.81969	-2.72859	-2.93139	-3.95014	-2.90675	-3.98027	-3.85257	-4.13565	-4.56835	-4.73066	-4.74374	-3.97009	-3.96202	-4.16018	-3.45277	-4.32438	-0.871614	0.00266675	0.033409
3696	sp|Q9C004|SPY4_HUMAN	sp|Q9C004|SPY4_HUMAN	6	sp|Q9C004|SPY4_HUMAN Protein sprouty homolog 4 OS=Homo sapiens OX=9606 GN=SPRY4 PE=1 SV=2	1.14821	0.272456	sp|Q9C004|SPY4_HUMAN	-0.875755	-1.30549	-0.446016	0.710333	-4.36957	0.000636938	0.014526	0	393980000	272420000	248300000	211590000	269590000	344530000	301160000	195710000	282530000	260800000	165580000	161670000	201350000	194830000	1.25741	1.57114	1.29153	1.49136	0.101355	1.10647	1.2182	0.00926412	0.569025	0.479221	0.0457425	0.131691	0.535051	0.137195	1.14821	0.272456	-0.875755	0.000636938	0.014526
2348	sp|Q53EL6|PDCD4_HUMAN	sp|Q53EL6|PDCD4_HUMAN	14	sp|Q53EL6|PDCD4_HUMAN Programmed cell death protein 4 OS=Homo sapiens OX=9606 GN=PDCD4 PE=1 SV=2	0.553203	-0.328507	sp|Q53EL6|PDCD4_HUMAN	-0.88171	-1.25368	-0.50974	0.112348	-5.08251	0.000165432	0.00616825	0	372890000	110640000	133100000	110740000	411430000	202350000	168340000	153170000	131370000	105680000	117240000	121070000	138360000	201980000	1.17802	0.285423	0.41233	0.553544	0.715398	0.340379	0.387325	-0.346296	-0.543647	-0.854839	-0.451592	-0.288763	-0.00352318	0.189111	0.553203	-0.328507	-0.88171	0.000165432	0.00616825
1583	sp|P61088|UBE2N_HUMAN;sp|Q5JXB2|UE2NL_HUMAN	sp|P61088|UBE2N_HUMAN	7	sp|P61088|UBE2N_HUMAN Ubiquitin-conjugating enzyme E2 N OS=Homo sapiens OX=9606 GN=UBE2N PE=1 SV=1;sp|Q5JXB2|UE2NL_HUMAN Putative ubiquitin-conjugating enzyme E2 N-like OS=Homo sapiens OX=9606 GN=UBE2NL PE=1 SV=1	0.218895	-0.663195	sp|P61088|UBE2N_HUMAN	-0.88209	-1.33949	-0.424685	-0.22215	-4.13498	0.00100462	0.0188036	0	247690000	144040000	103730000	105270000	383310000	135630000	82279000	185420000	130170000	118470000	91191000	84691000	68187000	109790000	0.587683	0.66185	0.060797	0.480171	0.612565	-0.235531	-0.635273	-0.0690921	-0.556981	-0.686122	-0.813563	-0.808332	-1.01928	-0.688997	0.218895	-0.663195	-0.88209	0.00100462	0.0188036
423	sp|O75369|FLNB_HUMAN	sp|O75369|FLNB_HUMAN	123	sp|O75369|FLNB_HUMAN Filamin-B OS=Homo sapiens OX=9606 GN=FLNB PE=1 SV=2	5.91596	5.03339	sp|O75369|FLNB_HUMAN	-0.882566	-1.17756	-0.587577	5.47467	-6.41507	1.59051e-05	0.00126648	0	12597000000	5678400000	7895400000	3676800000	10099000000	11365000000	8267200000	5887900000	6761700000	5309500000	4782600000	4498400000	4626900000	6925700000	6.2573	5.90472	6.16937	5.62687	5.36434	6.13922	5.94987	4.94768	5.18271	4.92959	4.89083	4.96728	5.03472	5.28091	5.91596	5.03339	-0.882566	1.59051e-05	0.00126648
3194	sp|Q969T9|WBP2_HUMAN	sp|Q969T9|WBP2_HUMAN	4	sp|Q969T9|WBP2_HUMAN WW domain-binding protein 2 OS=Homo sapiens OX=9606 GN=WBP2 PE=1 SV=1	0.200393	-0.694711	sp|Q969T9|WBP2_HUMAN	-0.895104	-1.38377	-0.406435	-0.247159	-3.92753	0.00150915	0.0238973	0	180990000	124420000	105240000	97553000	164980000	261330000	154760000	88063000	95875000	130390000	77975000	117310000	153380000	92328000	0.13496	0.452913	0.0811748	0.369897	-0.611957	0.708588	0.267176	-1.14929	-1.00131	-0.54454	-1.03911	-0.334632	0.144417	-0.938517	0.200393	-0.694711	-0.895104	0.00150915	0.0238973
3034	sp|Q8TEM1|PO210_HUMAN	sp|Q8TEM1|PO210_HUMAN	26	sp|Q8TEM1|PO210_HUMAN Nuclear pore membrane glycoprotein 210 OS=Homo sapiens OX=9606 GN=NUP210 PE=1 SV=3	2.30396	1.40666	sp|Q8TEM1|PO210_HUMAN	-0.897293	-1.14393	-0.650659	1.85531	-7.80085	1.79872e-06	0.000256073	0	863570000	489150000	616780000	375750000	845700000	825730000	645450000	509730000	532100000	429000000	412380000	419560000	352850000	511200000	2.38985	2.40633	2.57448	2.32316	1.76199	2.36474	2.30713	1.398	1.48885	1.21423	1.36026	1.51821	1.34036	1.52672	2.30396	1.40666	-0.897293	1.79872e-06	0.000256073
3561	sp|Q9BSR8|YIPF4_HUMAN	sp|Q9BSR8|YIPF4_HUMAN	2	sp|Q9BSR8|YIPF4_HUMAN Protein YIPF4 OS=Homo sapiens OX=9606 GN=YIPF4 PE=1 SV=1	-2.93289	-3.84323	sp|Q9BSR8|YIPF4_HUMAN	-0.910342	-1.35294	-0.467748	-3.35305	-4.44204	0.000659126	0.0148161	1	24812000	12506000	15494000	9701500	24506000	18547000	16884000	18852000	8896800	NA	9869900	11917000	14425000	8994100	-2.73246	-2.8253	-2.62014	-2.97327	-3.38182	-3.09965	-2.89761	-3.38554	-4.45564	NA	-4.01665	-3.65952	-3.24901	-4.29305	-2.93289	-3.84323	-0.910342	0.000659126	0.0148161
2567	sp|Q6RW13|ATRAP_HUMAN	sp|Q6RW13|ATRAP_HUMAN	2	sp|Q6RW13|ATRAP_HUMAN Type-1 angiotensin II receptor-associated protein OS=Homo sapiens OX=9606 GN=AGTRAP PE=1 SV=1	-1.90313	-2.83492	sp|Q6RW13|ATRAP_HUMAN	-0.931782	-1.48745	-0.37612	-2.36903	-3.59554	0.00291146	0.0348929	0	50519000	22360000	27347000	19342000	78950000	40703000	27986000	15568000	36598000	34775000	31798000	10870000	34081000	19958000	-1.70645	-1.99618	-1.81903	-1.97385	-1.6825	-1.96819	-2.17575	-3.66321	-2.40064	-2.49634	-2.33129	-3.79322	-2.01481	-3.14491	-1.90313	-2.83492	-0.931782	0.00291146	0.0348929
3309	sp|Q96GN5|CDA7L_HUMAN	sp|Q96GN5|CDA7L_HUMAN	3	sp|Q96GN5|CDA7L_HUMAN Cell division cycle-associated 7-like protein OS=Homo sapiens OX=9606 GN=CDCA7L PE=1 SV=2	-2.10368	-3.03977	sp|Q96GN5|CDA7L_HUMAN	-0.936083	-1.51235	-0.359819	-2.57172	-3.483	0.00364186	0.0403318	0	26896000	22528000	39862000	13408000	43874000	54837000	26440000	23949000	43406000	22192000	24426000	17417000	15209000	11528000	-2.61608	-1.9855	-1.28771	-2.5046	-2.53585	-1.53912	-2.25692	-3.03836	-2.15275	-3.15967	-2.71125	-3.10778	-3.17304	-3.93551	-2.10368	-3.03977	-0.936083	0.00364186	0.0403318
3774	sp|Q9H2U2|IPYR2_HUMAN	sp|Q9H2U2|IPYR2_HUMAN	8	sp|Q9H2U2|IPYR2_HUMAN Inorganic pyrophosphatase 2, mitochondrial OS=Homo sapiens OX=9606 GN=PPA2 PE=1 SV=2	-0.144852	-1.08777	sp|Q9H2U2|IPYR2_HUMAN	-0.942921	-1.48511	-0.400731	-0.616312	-3.72893	0.00223429	0.0303372	0	266380000	83369000	110530000	48459000	200360000	132900000	90422000	124090000	112150000	62190000	46817000	81844000	48573000	132970000	0.692656	-0.118394	0.150327	-0.643544	-0.329741	-0.264802	-0.500466	-0.651741	-0.773486	-1.63788	-1.77401	-0.858048	-1.50618	-0.413069	-0.144852	-1.08777	-0.942921	0.00223429	0.0303372
1100	sp|P30740|ILEU_HUMAN	sp|P30740|ILEU_HUMAN	17	sp|P30740|ILEU_HUMAN Leukocyte elastase inhibitor OS=Homo sapiens OX=9606 GN=SERPINB1 PE=1 SV=1	2.76547	1.79451	sp|P30740|ILEU_HUMAN	-0.970957	-1.43428	-0.507634	2.27999	-4.49342	0.000501856	0.0125411	0	1471500000	612960000	979030000	393270000	1247200000	1383700000	699380000	622250000	603440000	906540000	608820000	628600000	529270000	338650000	3.15891	2.72828	3.22598	2.38917	2.32629	3.1079	2.42176	1.68737	1.67166	2.31915	1.92148	2.10601	1.92238	0.933543	2.76547	1.79451	-0.970957	0.000501856	0.0125411
1383	sp|P49959|MRE11_HUMAN	sp|P49959|MRE11_HUMAN	5	sp|P49959|MRE11_HUMAN Double-strand break repair protein MRE11 OS=Homo sapiens OX=9606 GN=MRE11 PE=1 SV=3	-1.39283	-2.37479	sp|P49959|MRE11_HUMAN	-0.981966	-1.56162	-0.402308	-1.88381	-3.63233	0.00270625	0.0338137	0	36837000	36375000	57256000	15908000	103810000	74879000	69515000	28917000	31051000	31378000	25269000	36558000	49689000	33350000	-2.16222	-1.30185	-0.777123	-2.25696	-1.28487	-1.09069	-0.876074	-2.76489	-2.63946	-2.64814	-2.66238	-2.02978	-1.47357	-2.40533	-1.39283	-2.37479	-0.981966	0.00270625	0.0338137
4414	sp|Q9UQ90|SPG7_HUMAN	sp|Q9UQ90|SPG7_HUMAN	4	sp|Q9UQ90|SPG7_HUMAN Paraplegin OS=Homo sapiens OX=9606 GN=SPG7 PE=1 SV=2	-2.94574	-3.93448	sp|Q9UQ90|SPG7_HUMAN	-0.988739	-1.44941	-0.52807	-3.40208	-4.63529	0.000462874	0.011883	1	23852000	12963000	19286000	8027500	25143000	15722000	17882000	NA	13751000	7819500	13694000	10171000	8407200	14301000	-2.7894	-2.77409	-2.31145	-3.24762	-3.34455	-3.33753	-2.81557	NA	-3.82297	-4.70015	-3.54491	-3.88985	-4.02399	-3.62502	-2.94574	-3.93448	-0.988739	0.000462874	0.011883
2347	sp|Q52LW3|RHG29_HUMAN	sp|Q52LW3|RHG29_HUMAN	49	sp|Q52LW3|RHG29_HUMAN Rho GTPase-activating protein 29 OS=Homo sapiens OX=9606 GN=ARHGAP29 PE=1 SV=2	3.83968	2.83379	sp|Q52LW3|RHG29_HUMAN	-1.00589	-1.23091	-0.780864	3.33674	-9.58473	1.53541e-07	4.50835e-05	0	2149300000	1457000000	1707700000	968570000	2965800000	2579100000	1988600000	1264600000	1138200000	1483700000	1176300000	1120700000	1106800000	1139700000	3.70561	3.96373	4.01044	3.69468	3.58455	4.00426	3.9145	2.7162	2.59368	3.04672	2.87026	2.94668	2.98138	2.68163	3.83968	2.83379	-1.00589	1.53541e-07	4.50835e-05
2659	sp|Q7Z333|SETX_HUMAN	sp|Q7Z333|SETX_HUMAN	11	sp|Q7Z333|SETX_HUMAN Probable helicase senataxin OS=Homo sapiens OX=9606 GN=SETX PE=1 SV=4	-0.663211	-1.67543	sp|Q7Z333|SETX_HUMAN	-1.01222	-1.58259	-0.441844	-1.16932	-3.80518	0.00192129	0.0280317	0	48441000	57382000	97534000	89955000	189270000	82141000	60245000	60754000	54687000	61094000	77783000	43023000	36886000	50000000	-1.76706	-0.651402	-0.026047	0.252449	-0.41245	-0.957445	-1.08052	-1.68784	-1.81706	-1.66413	-1.04266	-1.79303	-1.90127	-1.82199	-0.663211	-1.67543	-1.01222	0.00192129	0.0280317
3166	sp|Q92945|FUBP2_HUMAN	sp|Q92945|FUBP2_HUMAN	19	sp|Q92945|FUBP2_HUMAN Far upstream element-binding protein 2 OS=Homo sapiens OX=9606 GN=KHSRP PE=1 SV=4	1.93122	0.912022	sp|Q92945|FUBP2_HUMAN	-1.0192	-1.45498	-0.583419	1.42162	-5.0148	0.000187532	0.00667443	0	688630000	685820000	475050000	244830000	657260000	488290000	408440000	335480000	408610000	284870000	306410000	256250000	248840000	438430000	2.06319	2.88854	2.20633	1.70271	1.39583	1.60847	1.65346	0.79112	1.10515	0.609592	0.932378	0.801358	0.839037	1.30552	1.93122	0.912022	-1.0192	0.000187532	0.00667443
1989	sp|Q13505|MTX1_HUMAN	sp|Q13505|MTX1_HUMAN	3	sp|Q13505|MTX1_HUMAN Metaxin-1 OS=Homo sapiens OX=9606 GN=MTX1 PE=1 SV=3	-2.88952	-3.92222	sp|Q13505|MTX1_HUMAN	-1.0327	-1.65096	-0.414447	-3.36615	-3.60737	0.00317111	0.0366943	1	18658000	17892000	16201000	17219000	44874000	13922000	7517600	16902000	14270000	10595000	9469100	10337000	NA	10826000	-3.14379	-2.31427	-2.55722	-2.14225	-2.50312	-3.51256	-4.05341	-3.54394	-3.76914	-4.25155	-4.07637	-3.86631	NA	-4.02601	-2.88952	-3.92222	-1.0327	0.00317111	0.0366943
2359	sp|Q53H96|P5CR3_HUMAN	sp|Q53H96|P5CR3_HUMAN	9	sp|Q53H96|P5CR3_HUMAN Pyrroline-5-carboxylate reductase 3 OS=Homo sapiens OX=9606 GN=PYCR3 PE=1 SV=3	0.0347706	-1.00127	sp|Q53H96|P5CR3_HUMAN	-1.03604	-1.59086	-0.481215	-0.483248	-4.00389	0.00129869	0.0221864	0	188270000	78202000	82505000	90874000	397160000	188560000	81615000	155930000	184590000	71216000	74168000	54773000	53665000	72587000	0.191865	-0.209688	-0.262004	0.267171	0.664124	0.238773	-0.646847	-0.320387	-0.0494484	-1.43773	-1.11122	-1.44196	-1.36307	-1.28504	0.0347706	-1.00127	-1.03604	0.00129869	0.0221864
4349	sp|Q9ULJ3|ZBT21_HUMAN	sp|Q9ULJ3|ZBT21_HUMAN	12	sp|Q9ULJ3|ZBT21_HUMAN Zinc finger and BTB domain-containing protein 21 OS=Homo sapiens OX=9606 GN=ZBTB21 PE=1 SV=2	0.58754	-0.450205	sp|Q9ULJ3|ZBT21_HUMAN	-1.03775	-1.49661	-0.578878	0.0686679	-4.84914	0.000255488	0.0081652	0	264240000	179090000	221810000	69419000	313410000	300810000	149560000	157400000	192920000	97095000	124700000	80403000	123760000	127890000	0.681016	0.972623	1.13246	-0.122913	0.320122	0.911123	0.218354	-0.306775	0.0146855	-0.979963	-0.362726	-0.883874	-0.163601	-0.46918	0.58754	-0.450205	-1.03775	0.000255488	0.0081652
4455	sp|Q9Y2Q3|GSTK1_HUMAN	sp|Q9Y2Q3|GSTK1_HUMAN	5	sp|Q9Y2Q3|GSTK1_HUMAN Glutathione S-transferase kappa 1 OS=Homo sapiens OX=9606 GN=GSTK1 PE=1 SV=3	-0.90924	-1.98048	sp|Q9Y2Q3|GSTK1_HUMAN	-1.07124	-1.7472	-0.395277	-1.44486	-3.39801	0.00431344	0.0447341	0	96410000	72696000	63434000	39869000	82013000	69015000	69187000	71137000	63264000	47542000	36482000	64039000	11362000	49902000	-0.77389	-0.313864	-0.632642	-0.926163	-1.62721	-1.20809	-0.88283	-1.45894	-1.60537	-2.03452	-2.13333	-1.21473	-3.59164	-1.82482	-0.90924	-1.98048	-1.07124	0.00431344	0.0447341
4444	sp|Q9Y2H0|DLGP4_HUMAN	sp|Q9Y2H0|DLGP4_HUMAN	3	sp|Q9Y2H0|DLGP4_HUMAN Disks large-associated protein 4 OS=Homo sapiens OX=9606 GN=DLGAP4 PE=1 SV=3	-3.8211	-4.89241	sp|Q9Y2H0|DLGP4_HUMAN	-1.07131	-1.67383	-0.468799	-4.35676	-3.8125	0.00189369	0.0278017	0	5554300	8909000	7540700	6817900	14701000	11633000	10835000	10386000	6439500	6374500	3522400	4130600	8652600	4212600	-4.89228	-3.30922	-3.63555	-3.48418	-4.12407	-3.77114	-3.53126	-4.25042	-4.92532	-5.00189	-5.50095	-5.2	-3.98269	-5.38563	-3.8211	-4.89241	-1.07131	0.00189369	0.0278017
3159	sp|Q92896|GSLG1_HUMAN	sp|Q92896|GSLG1_HUMAN	28	sp|Q92896|GSLG1_HUMAN Golgi apparatus protein 1 OS=Homo sapiens OX=9606 GN=GLG1 PE=1 SV=2	1.77236	0.69685	sp|Q92896|GSLG1_HUMAN	-1.07551	-1.38277	-0.768252	1.23461	-7.50535	2.80334e-06	0.000313574	0	417260000	352810000	420990000	225920000	740330000	628290000	507560000	311200000	319170000	260810000	276080000	186350000	308340000	288580000	1.34026	1.94011	2.03599	1.58628	1.5687	1.97137	1.96382	0.682129	0.746204	0.479277	0.782221	0.338248	1.1468	0.703076	1.77236	0.69685	-1.07551	2.80334e-06	0.000313574
3122	sp|Q92597|NDRG1_HUMAN	sp|Q92597|NDRG1_HUMAN	6	sp|Q92597|NDRG1_HUMAN Protein NDRG1 OS=Homo sapiens OX=9606 GN=NDRG1 PE=1 SV=1	-0.459078	-1.56439	sp|Q92597|NDRG1_HUMAN	-1.10532	-1.65318	-0.557449	-1.01174	-4.32586	0.000693111	0.0155059	0	158700000	45708000	63192000	61561000	190720000	95155000	119610000	29259000	73167000	51784000	63956000	65381000	78990000	59015000	-0.0546884	-0.975959	-0.638031	-0.296917	-0.401364	-0.745734	-0.100853	-2.74783	-1.39406	-1.9083	-1.32463	-1.18457	-0.808168	-1.58321	-0.459078	-1.56439	-1.10532	0.000693111	0.0155059
4127	sp|Q9NZ08|ERAP1_HUMAN	sp|Q9NZ08|ERAP1_HUMAN	4	sp|Q9NZ08|ERAP1_HUMAN Endoplasmic reticulum aminopeptidase 1 OS=Homo sapiens OX=9606 GN=ERAP1 PE=1 SV=3	-1.86852	-2.9844	sp|Q9NZ08|ERAP1_HUMAN	-1.11587	-1.69025	-0.541504	-2.42646	-4.16566	0.000946227	0.0182421	0	40929000	36935000	34887000	18567000	59023000	39637000	28114000	30754000	9019600	26827000	20089000	27384000	20628000	26774000	-2.01021	-1.28005	-1.47568	-2.03308	-2.10502	-2.00639	-2.16923	-2.67553	-4.43572	-2.87956	-2.99285	-2.44987	-2.73555	-2.7217	-1.86852	-2.9844	-1.11587	0.000946227	0.0182421
3036	sp|Q8TEW0|PARD3_HUMAN	sp|Q8TEW0|PARD3_HUMAN	7	sp|Q8TEW0|PARD3_HUMAN Partitioning defective 3 homolog OS=Homo sapiens OX=9606 GN=PARD3 PE=1 SV=2	-0.435269	-1.55223	sp|Q8TEW0|PARD3_HUMAN	-1.11696	-1.42279	-0.811131	-0.993749	-7.83106	1.72e-06	0.000252518	0	96998000	80428000	66750000	50734000	244900000	140990000	75593000	62146000	53386000	59430000	54433000	51381000	55281000	74820000	-0.765116	-0.169639	-0.560795	-0.577092	-0.0381654	-0.179737	-0.756338	-1.65497	-1.85204	-1.70492	-1.55688	-1.53491	-1.32048	-1.24139	-0.435269	-1.55223	-1.11696	1.72e-06	0.000252518
3198	sp|Q969X5|ERGI1_HUMAN	sp|Q969X5|ERGI1_HUMAN	9	sp|Q969X5|ERGI1_HUMAN Endoplasmic reticulum-Golgi intermediate compartment protein 1 OS=Homo sapiens OX=9606 GN=ERGIC1 PE=1 SV=1	1.80008	0.680626	sp|Q969X5|ERGI1_HUMAN	-1.11945	-1.4454	-0.793507	1.24035	-7.36415	3.47908e-06	0.00034776	0	795320000	232820000	324930000	250540000	1051100000	555230000	423260000	265920000	225410000	321170000	254940000	299910000	255340000	289810000	2.27104	1.34701	1.67079	1.7361	2.07782	1.79341	1.70437	0.454011	0.240841	0.786717	0.66746	1.0301	0.876053	0.709202	1.80008	0.680626	-1.11945	3.47908e-06	0.00034776
1277	sp|P46100|ATRX_HUMAN	sp|P46100|ATRX_HUMAN	4	sp|P46100|ATRX_HUMAN Transcriptional regulator ATRX OS=Homo sapiens OX=9606 GN=ATRX PE=1 SV=5	-3.18644	-4.31897	sp|P46100|ATRX_HUMAN	-1.13253	-1.72879	-0.536272	-3.75271	-4.07264	0.00113488	0.020414	0	15493000	9080700	11357000	13658000	48768000	9580900	10024000	6128300	8629500	8458900	7489400	7839700	12376000	11166000	-3.41202	-3.28199	-3.05812	-2.47784	-2.38224	-4.05051	-3.64239	-5.01576	-4.49997	-4.58408	-4.41425	-4.26836	-3.46893	-3.98147	-3.18644	-4.31897	-1.13253	0.00113488	0.020414
2249	sp|Q15942|ZYX_HUMAN	sp|Q15942|ZYX_HUMAN	11	sp|Q15942|ZYX_HUMAN Zyxin OS=Homo sapiens OX=9606 GN=ZYX PE=1 SV=1	0.259967	-0.875972	sp|Q15942|ZYX_HUMAN	-1.13594	-1.70514	-0.566733	-0.308003	-4.27904	0.000758935	0.0162578	0	278870000	89959000	159090000	81235000	330760000	146220000	131190000	115860000	159650000	64009000	103660000	51473000	51822000	183340000	0.758777	-0.00983972	0.663835	0.104761	0.398386	-0.127305	0.0311518	-0.751299	-0.260358	-1.5953	-0.628937	-1.53231	-1.41323	0.0496362	0.259967	-0.875972	-1.13594	0.000758935	0.0162578
171	sp|O14745|NHRF1_HUMAN	sp|O14745|NHRF1_HUMAN	5	sp|O14745|NHRF1_HUMAN Na(+)/H(+) exchange regulatory cofactor NHE-RF1 OS=Homo sapiens OX=9606 GN=SLC9A3R1 PE=1 SV=4	-1.18185	-2.36146	sp|O14745|NHRF1_HUMAN	-1.1796	-1.84346	-0.515751	-1.77166	-3.81	0.00190307	0.0278523	0	110440000	37945000	41499000	26658000	164260000	51931000	45623000	34395000	45354000	39413000	65684000	19023000	11493000	51635000	-0.57784	-1.24155	-1.23096	-1.50917	-0.61831	-1.6175	-1.47765	-2.51321	-2.08896	-2.31145	-1.28622	-2.97955	-3.57519	-1.77564	-1.18185	-2.36146	-1.1796	0.00190307	0.0278523
2277	sp|Q16666|IF16_HUMAN	sp|Q16666|IF16_HUMAN	39	sp|Q16666|IF16_HUMAN Gamma-interferon-inducible protein 16 OS=Homo sapiens OX=9606 GN=IFI16 PE=1 SV=3	4.52048	3.32783	sp|Q16666|IF16_HUMAN	-1.19265	-1.48433	-0.900967	3.92415	-8.76728	4.53678e-07	9.33226e-05	0	4218300000	2524800000	2819700000	1688800000	3971000000	4129300000	2620600000	1672900000	1856300000	1696700000	1942000000	1516400000	1701700000	1467500000	4.67861	4.74821	4.71754	4.49995	4.00851	4.6818	4.30872	3.12213	3.30441	3.24482	3.59249	3.38633	3.59886	3.04577	4.52048	3.32783	-1.19265	4.53678e-07	9.33226e-05
746	sp|P09382|LEG1_HUMAN	sp|P09382|LEG1_HUMAN	7	sp|P09382|LEG1_HUMAN Galectin-1 OS=Homo sapiens OX=9606 GN=LGALS1 PE=1 SV=2	1.79771	0.57325	sp|P09382|LEG1_HUMAN	-1.22446	-1.66216	-0.786768	1.18548	-5.99839	3.22229e-05	0.00214803	0	796430000	211340000	361960000	226690000	1480600000	480230000	374070000	265560000	311150000	359420000	196710000	161240000	247120000	277710000	2.27306	1.20889	1.82297	1.5912	2.57547	1.58451	1.5279	0.452046	0.709227	0.95289	0.293921	0.127819	0.829081	0.647769	1.79771	0.57325	-1.22446	3.22229e-05	0.00214803
2984	sp|Q8NI60|COQ8A_HUMAN	sp|Q8NI60|COQ8A_HUMAN	5	sp|Q8NI60|COQ8A_HUMAN Atypical kinase COQ8A, mitochondrial OS=Homo sapiens OX=9606 GN=COQ8A PE=1 SV=1	-1.7001	-2.93948	sp|Q8NI60|COQ8A_HUMAN	-1.23937	-2.00186	-0.47689	-2.36746	-3.51039	0.00381932	0.0413069	1	42465000	NA	34557000	25780000	104310000	41772000	31916000	36955000	9169800	25809000	43954000	13382000	13997000	39248000	-1.95705	NA	-1.48908	-1.55768	-1.27789	-1.93087	-1.98804	-2.40906	-4.41173	-2.93669	-1.86492	-3.49094	-3.29225	-2.17076	-1.7001	-2.93948	-1.23937	0.00381932	0.0413069
1760	sp|Q00537|CDK17_HUMAN;sp|Q00536|CDK16_HUMAN	sp|Q00537|CDK17_HUMAN	8	sp|Q00537|CDK17_HUMAN Cyclin-dependent kinase 17 OS=Homo sapiens OX=9606 GN=CDK17 PE=1 SV=2;sp|Q00536|CDK16_HUMAN Cyclin-dependent kinase 16 OS=Homo sapiens OX=9606 GN=CDK16 PE=1 SV=1	-1.97499	-3.21583	sp|Q00537|CDK17_HUMAN	-1.24084	-1.77624	-0.705437	-2.59541	-4.96932	0.000204077	0.00704966	0	52893000	35231000	29504000	14877000	76964000	33496000	18039000	14578000	15218000	31233000	25781000	16472000	11427000	21830000	-1.64018	-1.34744	-1.71198	-2.35401	-1.7195	-2.24872	-2.80309	-3.75853	-3.67568	-2.65498	-2.63348	-3.18889	-3.58345	-3.01576	-1.97499	-3.21583	-1.24084	0.000204077	0.00704966
224	sp|O15226|NKRF_HUMAN	sp|O15226|NKRF_HUMAN	16	sp|O15226|NKRF_HUMAN NF-kappa-B-repressing factor OS=Homo sapiens OX=9606 GN=NKRF PE=1 SV=2	0.465759	-0.781309	sp|O15226|NKRF_HUMAN	-1.24707	-1.63802	-0.856111	-0.157775	-6.83946	7.94122e-06	0.000690886	0	302240000	99474000	127910000	88396000	266680000	264560000	233800000	102000000	113410000	86012000	107190000	87761000	125390000	80570000	0.874903	0.133623	0.356248	0.227126	0.0855905	0.726272	0.856549	-0.93614	-0.757253	-1.15896	-0.580697	-0.756561	-0.144818	-1.13474	0.465759	-0.781309	-1.24707	7.94122e-06	0.000690886
1267	sp|P45973|CBX5_HUMAN	sp|P45973|CBX5_HUMAN	7	sp|P45973|CBX5_HUMAN Chromobox protein homolog 5 OS=Homo sapiens OX=9606 GN=CBX5 PE=1 SV=1	0.692755	-0.582642	sp|P45973|CBX5_HUMAN	-1.2754	-1.58471	-0.96608	0.0550566	-8.84102	4.10228e-07	9.33226e-05	0	218600000	206990000	191160000	139860000	387900000	205810000	176330000	115300000	126610000	130790000	129190000	98233000	73583000	137150000	0.407402	1.17921	0.922773	0.891692	0.629856	0.364785	0.453565	-0.758328	-0.597273	-0.540016	-0.311767	-0.592669	-0.909954	-0.368484	0.692755	-0.582642	-1.2754	4.10228e-07	9.33226e-05
4422	sp|Q9Y232|CDYL_HUMAN	sp|Q9Y232|CDYL_HUMAN	5	sp|Q9Y232|CDYL_HUMAN Chromodomain Y-like protein OS=Homo sapiens OX=9606 GN=CDYL PE=1 SV=2	-1.8546	-3.16984	sp|Q9Y232|CDYL_HUMAN	-1.31524	-2.15238	-0.478099	-2.51222	-3.36874	0.00457247	0.0463963	0	65450000	34405000	32189000	17066000	31587000	49191000	36024000	40341000	21093000	26609000	21105000	7390100	33059000	7901900	-1.3328	-1.3813	-1.58917	-2.15518	-3.01313	-1.69553	-1.81509	-2.28187	-3.20133	-2.89161	-2.92178	-4.35423	-2.05852	-4.47954	-1.8546	-3.16984	-1.31524	0.00457247	0.0463963
222	sp|O15173|PGRC2_HUMAN	sp|O15173|PGRC2_HUMAN	5	sp|O15173|PGRC2_HUMAN Membrane-associated progesterone receptor component 2 OS=Homo sapiens OX=9606 GN=PGRMC2 PE=1 SV=1	-1.32491	-2.67071	sp|O15173|PGRC2_HUMAN	-1.3458	-2.16423	-0.527364	-1.99781	-3.52579	0.00334458	0.0381379	0	101780000	38204000	20258000	46839000	97773000	47624000	51739000	43290000	25455000	38119000	53909000	8696400	11186000	46579000	-0.695674	-1.23185	-2.24212	-0.692794	-1.37189	-1.74213	-1.29794	-2.17952	-2.9282	-2.36075	-1.57082	-4.11758	-3.61405	-1.92408	-1.32491	-2.67071	-1.3458	0.00334458	0.0381379
1392	sp|P50453|SPB9_HUMAN	sp|P50453|SPB9_HUMAN	19	sp|P50453|SPB9_HUMAN Serpin B9 OS=Homo sapiens OX=9606 GN=SERPINB9 PE=1 SV=1	2.48907	1.12213	sp|P50453|SPB9_HUMAN	-1.36695	-1.67168	-1.06222	1.8056	-9.61828	1.4708e-07	4.50835e-05	0	862060000	564790000	718700000	348690000	1376300000	967250000	668780000	473930000	304120000	539050000	364030000	298650000	354150000	305430000	2.38732	2.6115	2.79012	2.2149	2.46937	2.59246	2.35785	1.29235	0.676021	1.55147	1.18061	1.02398	1.34564	0.78482	2.48907	1.12213	-1.36695	1.4708e-07	4.50835e-05
2780	sp|Q8IVL0|NAV3_HUMAN	sp|Q8IVL0|NAV3_HUMAN	30	sp|Q8IVL0|NAV3_HUMAN Neuron navigator 3 OS=Homo sapiens OX=9606 GN=NAV3 PE=1 SV=3	1.13362	-0.27099	sp|Q8IVL0|NAV3_HUMAN	-1.40461	-1.83551	-0.973708	0.431314	-6.98939	6.24958e-06	0.000564625	0	481870000	241460000	244390000	159380000	327700000	303430000	325620000	174750000	165920000	219480000	134480000	71195000	115800000	155430000	1.548	1.399	1.26915	1.08093	0.384886	0.923606	1.32975	-0.155074	-0.204386	0.224482	-0.253955	-1.06071	-0.259032	-0.188252	1.13362	-0.27099	-1.40461	6.24958e-06	0.000564625
3403	sp|Q96QF0|RAB3I_HUMAN	sp|Q96QF0|RAB3I_HUMAN	4	sp|Q96QF0|RAB3I_HUMAN Rab-3A-interacting protein OS=Homo sapiens OX=9606 GN=RAB3IP PE=1 SV=1	-1.10347	-2.56915	sp|Q96QF0|RAB3I_HUMAN	-1.46568	-1.86979	-1.06157	-1.83631	-7.7768	1.8641e-06	0.000257575	0	85067000	55692000	59923000	17438000	119790000	86965000	52149000	32678000	33472000	35310000	30210000	22522000	20759000	30653000	-0.954512	-0.694058	-0.712928	-2.12395	-1.07689	-0.875293	-1.28667	-2.5875	-2.53037	-2.47379	-2.40509	-2.73406	-2.72647	-2.5268	-1.10347	-2.56915	-1.46568	1.8641e-06	0.000257575
677	sp|P05412|JUN_HUMAN	sp|P05412|JUN_HUMAN	9	sp|P05412|JUN_HUMAN Transcription factor AP-1 OS=Homo sapiens OX=9606 GN=JUN PE=1 SV=2	0.553478	-0.925108	sp|P05412|JUN_HUMAN	-1.47859	-2.16688	-0.790289	-0.185815	-4.60608	0.000404606	0.0108619	0	219890000	217540000	133850000	91548000	417620000	203040000	173180000	135740000	242260000	91492000	37661000	43426000	69442000	136820000	0.415892	1.25014	0.420253	0.277874	0.737089	0.345279	0.427816	-0.521558	0.34559	-1.06774	-2.08752	-1.77947	-0.9931	-0.371954	0.553478	-0.925108	-1.47859	0.000404606	0.0108619
1806	sp|Q03154|ACY1_HUMAN	sp|Q03154|ACY1_HUMAN	2	sp|Q03154|ACY1_HUMAN Aminoacylase-1 OS=Homo sapiens OX=9606 GN=ACY1 PE=1 SV=1	-2.48902	-4.01763	sp|Q03154|ACY1_HUMAN	-1.52862	-2.15576	-0.901473	-3.25333	-5.22628	0.000127013	0.00518876	0	39521000	8996200	17141000	11612000	112420000	17725000	21650000	10253000	8008900	10754000	9336900	13376000	9921900	14134000	-2.06073	-3.29533	-2.4777	-2.7129	-1.16913	-3.16491	-2.54244	-4.26912	-4.60841	-4.22956	-4.09663	-3.49159	-3.78619	-3.64194	-2.48902	-4.01763	-1.52862	0.000127013	0.00518876
3799	sp|Q9H4F1|SIA7D_HUMAN	sp|Q9H4F1|SIA7D_HUMAN	3	sp|Q9H4F1|SIA7D_HUMAN Alpha-N-acetyl-neuraminyl-2,3-beta-galactosyl-1,3-N-acetyl-galactosaminide alpha-2,6-sialyltransferase OS=Homo sapiens OX=9606 GN=ST6GALNAC4 PE=2 SV=2	-1.55616	-3.08485	sp|Q9H4F1|SIA7D_HUMAN	-1.52869	-2.21808	-0.839306	-2.32051	-4.75464	0.000305233	0.00879639	0	67681000	32118000	37230000	25556000	40816000	63132000	55498000	7790000	41396000	26453000	24316000	17676000	17099000	22141000	-1.28443	-1.47945	-1.38402	-1.57032	-2.6408	-1.33634	-1.19776	-4.66769	-2.22164	-2.90029	-2.71776	-3.08632	-3.00489	-2.99538	-1.55616	-3.08485	-1.52869	0.000305233	0.00879639
2068	sp|Q14202|ZMYM3_HUMAN	sp|Q14202|ZMYM3_HUMAN	4	sp|Q14202|ZMYM3_HUMAN Zinc finger MYM-type protein 3 OS=Homo sapiens OX=9606 GN=ZMYM3 PE=1 SV=2	-2.84206	-4.39156	sp|Q14202|ZMYM3_HUMAN	-1.5495	-2.32189	-0.777101	-3.61681	-4.30141	0.00072671	0.0158059	0	25374000	12676000	16256000	4876100	48690000	27621000	16217000	11809000	7092800	5192200	11533000	3826400	5774700	23326000	-2.70014	-2.80603	-2.55245	-3.9697	-2.38457	-2.52633	-2.95518	-4.06414	-4.78491	-5.30485	-3.79232	-5.31122	-4.56316	-2.92028	-2.84206	-4.39156	-1.5495	0.00072671	0.0158059
3018	sp|Q8TD30|ALAT2_HUMAN	sp|Q8TD30|ALAT2_HUMAN	7	sp|Q8TD30|ALAT2_HUMAN Alanine aminotransferase 2 OS=Homo sapiens OX=9606 GN=GPT2 PE=1 SV=1	-0.327448	-1.89122	sp|Q8TD30|ALAT2_HUMAN	-1.56378	-1.90442	-1.22313	-1.10934	-9.84304	1.10602e-07	3.99698e-05	0	140170000	72494000	96230000	60427000	169250000	149590000	78511000	60884000	39501000	36613000	45971000	52641000	44566000	46903000	-0.233851	-0.317834	-0.0450257	-0.323847	-0.574841	-0.094504	-0.702235	-1.68474	-2.28973	-2.42028	-1.80028	-1.49969	-1.62977	-1.9141	-0.327448	-1.89122	-1.56378	1.10602e-07	3.99698e-05
2490	sp|Q6DT37|MRCKG_HUMAN	sp|Q6DT37|MRCKG_HUMAN	3	sp|Q6DT37|MRCKG_HUMAN Serine/threonine-protein kinase MRCK gamma OS=Homo sapiens OX=9606 GN=CDC42BPG PE=1 SV=2	0.42669	-1.14531	sp|Q6DT37|MRCKG_HUMAN	-1.572	-2.23174	-0.912263	-0.419772	-5.14594	0.000186056	0.00667245	1	122480000	135030000	100840000	263730000	NA	170150000	181740000	77206000	65202000	93588000	54715000	74398000	95315000	88683000	-0.428525	0.569681	0.0209549	1.81042	NA	0.0908816	0.496733	-1.34017	-1.56153	-1.03429	-1.54944	-0.99673	-0.538489	-0.996538	0.42669	-1.14531	-1.572	0.000186056	0.00667245
4488	sp|Q9Y371|SHLB1_HUMAN	sp|Q9Y371|SHLB1_HUMAN	4	sp|Q9Y371|SHLB1_HUMAN Endophilin-B1 OS=Homo sapiens OX=9606 GN=SH3GLB1 PE=1 SV=1	-1.28263	-2.91673	sp|Q9Y371|SHLB1_HUMAN	-1.6341	-2.29823	-0.969969	-2.03683	-5.31384	0.000138929	0.00548477	1	36963000	50037000	61466000	45257000	70874000	37289000	83101000	36949000	NA	22800000	29556000	16696000	13583000	21614000	-2.15729	-0.84684	-0.67708	-0.742561	-1.83924	-2.0943	-0.621072	-2.40929	NA	-3.11976	-2.43662	-3.16925	-3.33534	-3.03009	-1.28263	-2.91673	-1.6341	0.000138929	0.00548477
1229	sp|P42025|ACTY_HUMAN	sp|P42025|ACTY_HUMAN	9	sp|P42025|ACTY_HUMAN Beta-centractin OS=Homo sapiens OX=9606 GN=ACTR1B PE=1 SV=1	-0.900662	-2.61318	sp|P42025|ACTY_HUMAN	-1.71251	-2.71729	-0.707734	-1.75692	-3.65446	0.00258989	0.0329275	0	117600000	51447000	45975000	52807000	151820000	35674000	89576000	119620000	22757000	25678000	13842000	61788000	19845000	11296000	-0.487195	-0.807188	-1.08653	-0.519086	-0.732705	-2.15803	-0.513893	-0.704965	-3.091	-2.9442	-3.52942	-1.26675	-2.7911	-3.96479	-0.900662	-2.61318	-1.71251	0.00258989	0.0329275
2643	sp|Q7L8J4|3BP5L_HUMAN	sp|Q7L8J4|3BP5L_HUMAN	3	sp|Q7L8J4|3BP5L_HUMAN SH3 domain-binding protein 5-like OS=Homo sapiens OX=9606 GN=SH3BP5L PE=1 SV=1	-1.48586	-3.21114	sp|Q7L8J4|3BP5L_HUMAN	-1.72527	-2.68003	-0.77052	-2.3485	-3.8746	0.0016751	0.0259724	0	92596000	26907000	40294000	10006000	105630000	65779000	59470000	33210000	12971000	45834000	11489000	26994000	22328000	5403100	-0.832136	-1.73205	-1.27251	-2.92851	-1.25962	-1.27722	-1.09902	-2.56407	-3.90782	-2.08855	-3.79783	-2.47073	-2.62188	-5.0271	-1.48586	-3.21114	-1.72527	0.0016751	0.0259724
2902	sp|Q8N8S7|ENAH_HUMAN	sp|Q8N8S7|ENAH_HUMAN	10	sp|Q8N8S7|ENAH_HUMAN Protein enabled homolog OS=Homo sapiens OX=9606 GN=ENAH PE=1 SV=2	-0.342728	-2.10958	sp|Q8N8S7|ENAH_HUMAN	-1.76685	-2.28088	-1.25282	-1.22615	-7.3701	3.44742e-06	0.00034776	0	112280000	60913000	59245000	76795000	310720000	99726000	111380000	51599000	38038000	87575000	35461000	39759000	19679000	31661000	-0.553997	-0.566194	-0.728973	0.0233488	0.307601	-0.678192	-0.202687	-1.92479	-2.34456	-1.13236	-2.17423	-1.90774	-2.80316	-2.48019	-0.342728	-2.10958	-1.76685	3.44742e-06	0.00034776
1188	sp|P37275|ZEB1_HUMAN	sp|P37275|ZEB1_HUMAN	6	sp|P37275|ZEB1_HUMAN Zinc finger E-box-binding homeobox 1 OS=Homo sapiens OX=9606 GN=ZEB1 PE=1 SV=2	-2.08158	-3.89702	sp|P37275|ZEB1_HUMAN	-1.81544	-2.52997	-1.10092	-2.9893	-5.44787	8.49732e-05	0.00407351	0	27195000	17231000	20625000	15851000	126470000	40689000	28351000	6312400	17137000	19619000	14481000	6333100	5923500	23791000	-2.60012	-2.36798	-2.2168	-2.26216	-0.998071	-1.96868	-2.15724	-4.97282	-3.50312	-3.34167	-3.46441	-4.57864	-4.52664	-2.89185	-2.08158	-3.89702	-1.81544	8.49732e-05	0.00407351
754	sp|P09601|HMOX1_HUMAN	sp|P09601|HMOX1_HUMAN	14	sp|P09601|HMOX1_HUMAN Heme oxygenase 1 OS=Homo sapiens OX=9606 GN=HMOX1 PE=1 SV=1	1.43673	-0.433311	sp|P09601|HMOX1_HUMAN	-1.87004	-2.65261	-1.08747	0.501709	-5.12374	0.000153315	0.00580864	0	407320000	811920000	214660000	226550000	228560000	626610000	280490000	104610000	148180000	143390000	98454000	131280000	127950000	136930000	1.30546	3.12938	1.08626	1.59031	-0.138465	1.96751	1.11663	-0.899485	-0.36869	-0.404186	-0.703166	-0.171049	-0.115806	-0.370797	1.43673	-0.433311	-1.87004	0.000153315	0.00580864
1072	sp|P29966|MARCS_HUMAN	sp|P29966|MARCS_HUMAN	5	sp|P29966|MARCS_HUMAN Myristoylated alanine-rich C-kinase substrate OS=Homo sapiens OX=9606 GN=MARCKS PE=1 SV=4	-1.15387	-3.10585	sp|P29966|MARCS_HUMAN	-1.95197	-2.69508	-1.20887	-2.12986	-5.63228	6.11227e-05	0.00322646	0	57892000	45478000	33552000	40905000	126770000	72567000	62243000	23730000	6381700	21135000	39995000	18492000	14684000	36533000	-1.50987	-0.983157	-1.53069	-0.889005	-0.99463	-1.13584	-1.03391	-3.05169	-4.93842	-3.23174	-2.00089	-3.02071	-3.22346	-2.27402	-1.15387	-3.10585	-1.95197	6.11227e-05	0.00322646
3464	sp|Q99541|PLIN2_HUMAN	sp|Q99541|PLIN2_HUMAN	17	sp|Q99541|PLIN2_HUMAN Perilipin-2 OS=Homo sapiens OX=9606 GN=PLIN2 PE=1 SV=2	1.64666	-0.451514	sp|Q99541|PLIN2_HUMAN	-2.09818	-2.84915	-1.34721	0.597575	-5.99072	3.2652e-05	0.00214803	0	582940000	311860000	198860000	412520000	625100000	557650000	337360000	234230000	50073000	235530000	101280000	202760000	82294000	97277000	1.82276	1.76407	0.978456	2.45839	1.32296	1.79968	1.38035	0.269922	-1.94513	0.328711	-0.662398	0.460953	-0.749346	-0.863303	1.64666	-0.451514	-2.09818	3.2652e-05	0.00214803
1869	sp|Q08AF3|SLFN5_HUMAN	sp|Q08AF3|SLFN5_HUMAN	7	sp|Q08AF3|SLFN5_HUMAN Schlafen family member 5 OS=Homo sapiens OX=9606 GN=SLFN5 PE=1 SV=1	-1.30994	-3.76216	sp|Q08AF3|SLFN5_HUMAN	-2.45222	-3.29047	-1.61397	-2.44174	-6.31788	2.62817e-05	0.00187078	1	120780000	25462000	29163000	30863000	70072000	65064000	76679000	NA	14878000	30306000	10681000	17357000	10419000	4075500	-0.448694	-1.81081	-1.72837	-1.29702	-1.85577	-1.29295	-0.735963	NA	-3.70851	-2.69948	-3.90288	-3.1128	-3.71602	-5.43329	-1.30994	-3.76216	-2.45222	2.62817e-05	0.00187078
523	sp|O94979|SC31A_HUMAN	sp|O94979|SC31A_HUMAN	9	sp|O94979|SC31A_HUMAN Protein transport protein Sec31A OS=Homo sapiens OX=9606 GN=SEC31A PE=1 SV=3	-0.80588	-3.45833	sp|O94979|SC31A_HUMAN	-2.65245	-2.96995	-2.33495	-2.1321	-17.9129	4.53807e-11	2.13199e-07	0	81668000	43151000	46860000	41602000	162850000	127950000	78896000	19350000	16527000	18452000	16223000	9257000	14130000	18344000	-1.01335	-1.0581	-1.05965	-0.864533	-0.630833	-0.319443	-0.695247	-3.34771	-3.55578	-3.43223	-3.30077	-4.02675	-3.27867	-3.26638	-0.80588	-3.45833	-2.65245	4.53807e-11	2.13199e-07
4190	sp|Q9P2Q2|FRM4A_HUMAN	sp|Q9P2Q2|FRM4A_HUMAN	5	sp|Q9P2Q2|FRM4A_HUMAN FERM domain-containing protein 4A OS=Homo sapiens OX=9606 GN=FRMD4A PE=1 SV=3	-1.80887	-4.46636	sp|Q9P2Q2|FRM4A_HUMAN	-2.6575	-3.02898	-2.28602	-2.91616	-15.5806	2.4015e-09	5.64113e-06	2	51795000	19501000	28077000	18103000	80683000	63771000	32191000	NA	6412300	NA	8058400	8213700	6183800	8200700	-1.67045	-2.19139	-1.78188	-2.06974	-1.65096	-1.32185	-1.97579	NA	-4.93147	NA	-4.30876	-4.20061	-4.46491	-4.42607	-1.80887	-4.46636	-2.6575	2.4015e-09	5.64113e-06
2334	sp|Q499Z4|ZN672_HUMAN	sp|Q499Z4|ZN672_HUMAN	7	sp|Q499Z4|ZN672_HUMAN Zinc finger protein 672 OS=Homo sapiens OX=9606 GN=ZNF672 PE=2 SV=2	-0.489244	-3.32664	sp|Q499Z4|ZN672_HUMAN	-2.8374	-3.63686	-2.03794	-1.90794	-7.60997	2.39278e-06	0.000295552	0	97559000	71569000	73181000	52260000	150670000	128930000	103010000	31456000	41762000	48563000	7642600	12371000	6039900	11470000	-0.756794	-0.336158	-0.431098	-0.534168	-0.74375	-0.308459	-0.314281	-2.64279	-2.20885	-2.00314	-4.38508	-3.60516	-4.49871	-3.94277	-0.489244	-3.32664	-2.8374	2.39278e-06	0.000295552
4526	sp|Q9Y426|C2CD2_HUMAN	sp|Q9Y426|C2CD2_HUMAN	12	sp|Q9Y426|C2CD2_HUMAN C2 domain-containing protein 2 OS=Homo sapiens OX=9606 GN=C2CD2 PE=1 SV=2	2.12596	-0.960528	sp|Q9Y426|C2CD2_HUMAN	-3.08649	-3.61045	-2.56253	0.582716	-12.6307	4.66557e-09	7.30629e-06	0	660210000	409120000	475670000	279500000	1127100000	718770000	633740000	64739000	86790000	190760000	85853000	39534000	81166000	132900000	2.00238	2.1514	2.20817	1.89454	2.17922	2.16504	2.28098	-1.59567	-1.14596	0.0173661	-0.900458	-1.91599	-0.769158	-0.413828	2.12596	-0.960528	-3.08649	4.66557e-09	7.30629e-06
963	sp|P21980|TGM2_HUMAN	sp|P21980|TGM2_HUMAN	31	sp|P21980|TGM2_HUMAN Protein-glutamine gamma-glutamyltransferase 2 OS=Homo sapiens OX=9606 GN=TGM2 PE=1 SV=2	5.1869	2.06094	sp|P21980|TGM2_HUMAN	-3.12596	-3.68658	-2.56534	3.62392	-11.9558	9.48551e-09	8.61836e-06	0	6749900000	3938100000	4164200000	1865700000	8450100000	6353600000	5064200000	957170000	605210000	585100000	558330000	334670000	1307100000	1047100000	5.35696	5.38252	5.2673	4.64424	5.10541	5.30211	5.24978	2.31212	1.67592	1.67253	1.79676	1.18954	3.22016	2.55956	5.1869	2.06094	-3.12596	9.48551e-09	8.61836e-06
